## **Modelling spinal locomotor circuits for movements in developing zebrafish**

Roussel, Yann<sup>1,2</sup>, Gaudreau, Stephanie F.<sup>1</sup>, Kacer, Emily R.<sup>1</sup>, Sengupta, Mohini<sup>3</sup>, and Bui, Tuan V.<sup>1</sup>

<sup>1</sup>Brain and Mind Research Institute, Centre for Neural Dynamics, Department of Biology, University of Ottawa, Ottawa, Canada, K1N 6N5

<sup>2</sup>Blue Brain Project, École Polytechnique Fédérale de Lausanne, Genève, Switzerland, CH-1202

<sup>3</sup>Washington University School of Medicine, Department of Neuroscience, St Louis, MO, USA

### **Corresponding author:**

Tuan Vu Bui

[Tuan.bui@uottawa.ca](mailto:Tuan.bui@uottawa.ca)

Conflict of interest: The authors declare no competing financial interests.

**Acknowledgments:** We would like to thank Martha Bagnall, Vamsi Daliparthi, Joe Fetcho, Sara Goltash, Michael Hildebrand, Alex Laliberte, Nicolas Lalonde, John Lewis, Aaron Shifman, and Emily Standen for advice related to the modelling and critical discussion of this manuscript. This research was supported by an NSERC Discovery Grant (RGPIN-2015-06403), an NSERC Canadian Graduate Scholarship M award (NSERC 712210101627) and a McDonnell Center for Cellular and Molecular Neurobiology Postdoc Fellowship FY21.

1 **ABSTRACT**

2 Many spinal circuits dedicated to locomotor control have been identified in the developing  
3 zebrafish. How these circuits operate together to generate the various swimming movements  
4 during development remains to be clarified. In this study, we iteratively built models of  
5 developing zebrafish spinal circuits coupled to simplified musculoskeletal models that reproduce  
6 coiling and swimming movements. The neurons of the models were based upon morphologically  
7 or genetically identified populations in the developing zebrafish spinal cord. We simulated intact  
8 spinal circuits as well as circuits with silenced neurons or altered synaptic transmission to better  
9 understand the role of specific spinal neurons. Analysis of firing patterns and phase relationships  
10 helped identify possible mechanisms underlying the locomotor movements of developing  
11 zebrafish. Notably, our simulations demonstrated how the site and the operation of rhythm  
12 generation could transition between coiling and swimming. The simulations also underlined the  
13 importance of contralateral excitation to multiple tail beats. They allowed us to estimate the  
14 sensitivity of spinal locomotor networks to motor command amplitude, synaptic weights, length  
15 of ascending and descending axons, and firing behaviour. These models will serve as valuable  
16 tools to test and further understand the operation of spinal circuits for locomotion.

17

18

## 19 INTRODUCTION

20 Movements made in the early stages of development can be critical for the survival of many  
21 species. The escape response seen in various fish and amphibians is one such example of a vital  
22 movement present at early developmental stages (Domenici & Hale, 2019). However, the nervous  
23 system's control of movement does not come fully formed but matures as the nervous system  
24 develops (Favero et al., 2014). This maturation enables a broader repertoire of movements to arise.  
25 During this process, new neurons are born and subsequently integrated into neural circuits that are  
26 newly formed or refined, presumably leading to the emergence of progressively more coordinated  
27 and skillful maneuvers. Determining how the assembly of new circuits leads to the emergence of  
28 new movements can provide valuable insights into the role of distinct neurons or circuits in motor  
29 control.

30  
31 The maturation of swimming in developing zebrafish has been well described at both the  
32 ethological and the cellular levels (Drapeau et al., 2002; McLean & Fetcho, 2009). Single strong  
33 body bends on one side of the body, also known as coils, emerge during the first day of  
34 development at around 17 hours post-fertilization (hpf) as the earliest locomotor behaviour (Saint-  
35 Amant & Drapeau, 1998). Single coils are quickly followed by double coils (i.e. two successive  
36 coils, one for each side of the body) at around 24 hpf (Knogler et al., 2014). Touch-evoked  
37 swimming appears around 27 hpf as coiling begins to subside. Spontaneous swimming movements  
38 emerge around 2-3 days post fertilization (Saint-Amant, 2010). The first swimming movement  
39 zebrafish exhibit is burst swimming characterized by long (1 s long) but infrequent episodes of tail  
40 beats. Burst swimming is then replaced by beat-and-glide swimming characterized by shorter  
41 (several hundreds of ms long) but more frequent episodes. In both cases, swim episodes consist of

42 repetitive left-right alternating, low-amplitude tail beats that propagate from the rostral toward the  
43 caudal end of the fish body and are generated at 20 to 80 Hz (Budick & O'Malley, 2000; Buss &  
44 Drapeau, 2001).

45

46 During this rapid series of transitions between locomotor maneuvers, populations of spinal neurons  
47 are progressively generated, starting with primary motoneurons at about 9 hpf. Subsequently,  
48 spinal motoneurons and interneurons are generated in stereotyped spatiotemporal birth orders  
49 (Kimmel et al., 1994; Myers et al., 1986; Satou et al., 2012). Two successive waves of axogenesis  
50 occur in the embryonic spinal cord (Bernhardt et al., 1990). The first wave occurs around 16-17  
51 hpf. It includes axon growth in primary motoneurons (MNs) that innervate red and white muscle  
52 fibres at early developmental stages (Buss & Drapeau, 2000). Primary MNs enable coiling and  
53 escape movements (Kimmel et al., 1995; Saint-Amant & Drapeau, 2000). Several spinal  
54 interneurons that are also important for early movements extend their axons along with primary  
55 MNs. These include Ipsilateral Caudal (IC) interneurons that are thought to play an essential role  
56 in driving the rhythm of early locomotor behaviour due to their endogenous bursting activity (Tong  
57 & McDearmid, 2012). The second wave of axon growth occurs at around 23-25 hpf. It involves  
58 axon growth in secondary motoneurons involved with slower movements (D. W. Liu &  
59 Westerfield, 1988) and spinal interneuron populations that include excitatory and inhibitory,  
60 ipsilaterally and contralaterally, and ascending and descending projecting subtypes (Bernhardt et  
61 al., 1990; Higashijima et al., 2004). The progressive generation of new populations of spinal  
62 neurons and continued axonal growth coincides with the expansion of the zebrafish locomotor  
63 repertoire. This timing suggests that incorporating spinal circuits into existing locomotor circuits  
64 underlies the acquisition of novel locomotor maneuvers.

65  
66 We have recently provided evidence that the maturation from coiling to later stages of swimming  
67 is accompanied by an operational switch in how spinal locomotor circuits generate the rhythm  
68 underlying tail beats. Specifically, we demonstrated that spinal circuits transitioned from relying  
69 upon pacemakers with endogenous bursting properties during coiling towards depending upon  
70 network oscillators whose rhythm is driven by excitatory and inhibitory synapses (Roussel et al.,  
71 2020). In light of these and earlier findings describing the composition and maturation of spinal  
72 locomotor circuits, we sought to generate computational models that replicate developmental  
73 locomotor movements of the zebrafish. We iteratively constructed models for several locomotor  
74 movements by incorporating specific spinal populations, shifts in relative connection strength, and  
75 changes in the firing behaviour of neurons. While computational modelling has generated  
76 invaluable insights into the function and mechanisms of spinal locomotor circuits of several  
77 species (Ausborn et al., 2019; Bicanski et al., 2013; Danner et al., 2019; Ferrario et al., 2018; Hull  
78 et al., 2016; A. K. Kozlov et al., 2014; Sautois et al., 2007), there is to our knowledge no such  
79 model for the developing zebrafish spinal cord. Here, we build some of the first computational  
80 models of the zebrafish spinal locomotor circuit that can accurately reproduce predominant  
81 locomotor behaviours during early zebrafish development. In the process, we test theories about  
82 the possible contributions of specific neural circuits and spinal populations to locomotor  
83 movements in zebrafish and identify untested hypotheses on the operation of spinal locomotor  
84 networks in developing zebrafish.

85

86

## 87 **RESULTS**

88 We aimed to model how new locomotor movements may emerge from the integration of spinal  
89 interneurons and the modification of synaptic weights and firing behaviour over the first few days  
90 of development in the zebrafish. Our approach was to build an initial model based upon previously  
91 reported experimental observations of spinal circuits when the first locomotor movements emerge  
92 in zebrafish around 1 dpf. We then successively built upon this initial model to replicate several  
93 locomotor maneuvers of the developing zebrafish.

94

95 The models were composed of single-compartment neurons whose firing dynamics were  
96 determined by a small set of differential equations (Izhikevich, 2007). The firing of motoneurons  
97 was converted to muscle output. This output was used to estimate body angle and locomotor  
98 activity during simulations (**Figure 1**). The composition of each model depended on the  
99 developmental stage and the locomotor movement to be generated.

100

### 101 *Single coiling results from unilateral gap junction coupling*

102 Coiling, which is already observed at 1 dpf, is characterized by a single strong, slow (hundreds of  
103 ms in duration) tail beat on one side of the body followed by a return to resting position (Saint-  
104 Amant & Drapeau, 1998). Coiling events are relatively infrequent, reaching a maximum frequency  
105 of 1 Hz around 20 hpf (Saint-Amant & Drapeau, 1998). Previous studies have established that this  
106 behaviour is generated by a spinal circuit relying primarily on gap junctions (i.e. electrical  
107 synapses) (Saint-Amant & Drapeau, 2001). It has been proposed that rostrally-located IC  
108 pacemaker spinal neurons (Tong & McDermid, 2012) drive periodic depolarizations of ipsilateral  
109 MNs via electrical synapses (Drapeau et al., 2002; Saint-Amant & Drapeau, 2001). Glycinergic

110 synaptic bursts are observed in MNs during contralateral coiling events (Saint-Amant & Drapeau,  
111 2001). These synaptic bursts have been proposed to arise from contralaterally projecting  
112 glycinergic neurons (Saint-Amant & Drapeau, 2000) but are not responsible for any action  
113 potential firings or coiling movements (Saint-Amant & Drapeau, 2001). Applying a gap junction  
114 blocker, heptanol, but not glutamatergic and glycinergic antagonists, suppressed spinal activity  
115 responsible for coiling (Saint-Amant & Drapeau, 2000).

116  
117 NETWORK DESCRIPTION (**Figure 2A**) Based on the experimental observations reported above, the  
118 model for single coiling consisted of rostrocaudal chains of electrically coupled spinal neurons  
119 driven by a kernel of five recurrently connected pacemakers (IC neurons). One chain consisted of  
120 ten MNs. The other chain consisted of ten contralaterally projecting commissural inhibitory  
121 neurons. Neurons from the V0d population are active during large amplitude movements such as  
122 escapes (Satou et al., 2020), and so we assumed V0ds were the commissural inhibitory neurons  
123 active during coiling, which is another large amplitude movement. We selected an IC kernel size  
124 of five as a trade-off between computational simplicity and robustness of the kernel to the failure  
125 of firing of a small number of cells. Similarly, the size of the coiling model was set to ten somites.  
126 Thus, each model somite represents approximately three biological somites. This choice was made  
127 as a trade-off between computational simplicity and recreating the kinematics of coiling fish.

128  
129 IC neurons have been reported to project caudally through multiple somites (Bernhardt et al.,  
130 1990). Therefore, in addition to their recurrent connections, each IC formed electrical synapses  
131 with several rostral MNs and V0ds (the first four of each ipsilateral chain in our model). Electrical  
132 coupling between many populations of early-born spinal neurons has been previously

133 demonstrated, including between IC and motoneurons (Saint-Amant & Drapeau, 1998). Coupling  
134 between IC neurons and commissural inhibitory neurons has not been demonstrated yet. We based  
135 this electrical coupling between ICs and V0ds on the fact that glutamatergic blockers do not block  
136 glycinergic synaptic bursts present at this stage (Saint-Amant & Drapeau, 2001), suggesting that  
137 gap junctions mediate the activation of V0ds underlying these glycinergic bursts. Gap junction  
138 weights are found in **Table 3** in Material and Methods.

139  
140 The connectivity within the chains was identical for both MN and V0d chains. Each neuron in a  
141 chain formed electrical synapses with its three nearest rostral and caudal neighbours within the  
142 same chain. There was also electrical coupling across the two ipsilateral chains as MNs formed  
143 gap junctions with the three nearest rostral and three nearest caudal V0ds and vice-versa. Paired  
144 recordings of MNs and V0ds at this stage have yet to be published. Our assumption that MNs and  
145 V0ds are electrically coupled at this stage was based upon the widespread electrical coupling  
146 between ipsilateral spinal neurons (Saint-Amant & Drapeau, 2001). To reproduce the glycinergic  
147 bursts observed in MNs at this stage (Saint-Amant & Drapeau, 2001), V0ds projected to  
148 contralateral MNs. Thus, V0ds formed glycinergic synapses with contralateral MNs and ICs. The  
149 reversal potential of glycinergic synapses is depolarized during development (Ben-Ari, 2002) and  
150 was set to -45 mV in the single coiling model (see **Table 5** in Material and Methods). All V0ds  
151 sent ascending projections to contralateral ICs. V0ds projected to contralateral MNs within five to  
152 six segments so that the  $i^{th}$  V0d projected to all contralateral MNs between the  $i-5$  and  $i+5$   
153 segments. Chemical synaptic weights are found in **Table 4** in Material and Methods.

154



155 Each neuron was modelled as a single compartment neuron with subthreshold and suprathreshold  
156 membrane potential dynamics described by a small set of differential equations (Izhikevich, 2007).  
157 These equations have nine parameters:  $a$ ,  $b$ ,  $c$ ,  $d$ , and  $V_{max}$  (which respectively represent the time  
158 scale of the recovery variable  $u$ , the sensitivity of  $u$  to the sub-threshold variation of  $V$ , the reset  
159 value of  $V$  after a spike, the reset value of  $u$ , and the action potential peak), and  $k$ ,  $C$ ,  $V_r$ , and  $V_t$   
160 (coefficient for the approximation of the subthreshold part of the fast component of the current-  
161 voltage relationship of the neuron, cell capacitance, resting membrane potential, and threshold of  
162 action potential firing). Parameter values of ICs (see **Table 2** in Material and Methods for all  
163 neuron parameters) were chosen such that they exhibited a relatively depolarized threshold of  
164 action potentials and bursts of short action potentials lasting hundreds of ms as seen in  
165 experimental recordings in embryonic zebrafish (Tong & McDermid, 2012). They were also  
166 modelled to exhibit periodic bursts lasting hundreds of ms in response to a constant tonic drive  
167 (**Figure 2B**). This firing pattern was generated in part by having a low value of  $a$  and a relatively  
168 depolarized value of  $c$ . MNs (Drapeau et al., 1999) and V0ds were modelled to generate tonic  
169 repetitive firing in response to a step depolarization (**Figure 2B**). Finally, to activate the circuit, a  
170 constant drive was provided to the left ICs only. Restricting the drive to left ICs prevented the  
171 appearance of near-coincident bilateral coils that could be misinterpreted as spinally mediated  
172 multiple coils.

173

174 **SIMULATION RESULTS** Our simulations show that this model can generate single coils characterized  
175 by large body bends to one side of the body lasting approximately one second (**Figure 2C, Figure**  
176 **2 - video 1**). Our base single coiling model generated six evenly interspersed single coils during a  
177 10 s simulation. This 0.6 Hz coiling frequency is within the 0-1.0 Hz range of frequencies observed

178 during zebrafish development (Saint-Amant & Drapeau, 1998, 2000). Silencing ICs blocked  
179 activity in all spinal neurons (**Figure 2 – figure supplement 1A**), emphasizing the central role of  
180 the IC kernel in the generation of single coils.

181  
182 Previously reported whole-cell patch-clamp recordings of MNs at this developmental stage display  
183 two types of events (Saint-Amant & Drapeau, 2000, 2001): periodic depolarizations (PDs) via  
184 electrical synapses and synaptic bursts (SBs) from contralateral spinal glycinergic neurons that are  
185 depolarizing at rest due to the depolarized chloride reversal potential observed early in  
186 development. These events last hundreds of ms. In our model, SBs were observed in the  
187 contralateral ICs and MNs (events during coilings in left neurons seen in the grey traces in **Figure**  
188 **2C**). SBs were caused by glycinergic input from V0ds activated during the ipsilateral coilings. As  
189 observed experimentally (Saint-Amant & Drapeau, 2001), preventing SBs by silencing glycinergic  
190 synapses from V0ds did not preclude the generation of single coiling, nor did it lead to the  
191 generation of multiple coilings (**Figure 2 - figure supplement 1C**). PDs can be unmasked by  
192 hyperpolarizing motoneurons sufficiently to prevent the firing of action potentials (**Figure 2D**).  
193 An analysis of the phase delays between ipsilateral neurons during single coils shows that IC  
194 neuron firing precedes ipsilateral MN and V0d firing (**Figure 2E**) and reinforces that ICs drive  
195 single coiling events.

196  
197 To further validate the model, we tested whether the model could still generate single coils with  
198 different parameters. First, we tested whether the model could still generate single coils when the  
199 number of model somites was increased from ten to thirty to be closer to the number of biological  
200 somites in zebrafish (Stickney et al., 2000). A thirty-somite model with IC axons extending to all

201 somites and several modified gap junction weights (**Table 3**) generated single coils (**Figure 2 -**  
202 **figure supplement 2**).

203

204 Next, the base model's sensitivity to within-model parameter variability was tested. Variability in  
205 the amplitude of the tonic motor command, the rostrocaudal extent of every axonal projection,  
206 every parameter that set the dynamics of the membrane potential of each neuron ( $a$ ,  $b$ ,  $c$ ,  $d$ , and  
207  $V_{\max}$ ,  $k$ ,  $C$ ,  $V_r$  and  $V_t$ ), and all of the weights of gap junction and chemical synapses were modelled  
208 by scaling each value by a random number picked for each simulation. The random numbers were  
209 derived from a Gaussian distribution with mean,  $\mu = 1$ , and standard deviations,  $\sigma_d$  (tonic drive),  
210  $\sigma_l$  (rostrocaudal length of axonal projections),  $\sigma_p$  (dynamics of membrane potential), and  $\sigma_w$   
211 (synaptic weights), respectively. Ten 20-s long simulations were run at various values of  $\sigma_d$ ,  $\sigma_l$ ,  
212  $\sigma_p$ , and  $\sigma_w$ . In each simulation, the variability of only one of the four sets of parameters (amplitude  
213 of motor drive, length of axonal projection, membrane potential dynamics, synaptic weights) was  
214 tested, and the standard deviations of the three other sets of parameters were set to 0.

215

216 The single coiling model's suitability was assessed by the relative absence of truncated coils, which  
217 were movements with only partial contractions restricted to the body's rostral segments (**Figure 2**  
218 **- video 2**). We sought to determine the upper limit of variability within which the single coiling  
219 model remained suitable. For this reason, the ranges of  $\sigma_d$ ,  $\sigma_l$ ,  $\sigma_p$ , and  $\sigma_w$  that were tested differed  
220 amongst the four sets of parameters tested (**Figure 2F-M**). A comparison of the level of variability  
221 at which the models start generating more varying frequency of coiling and more truncated coils  
222 suggests that the single coiling model is more robust to noise in the amplitude of the tonic motor  
223 command (**Figure 2F,J**) and was most sensitive to variability in the parameters governing the

224 dynamics of the membrane potential (**Figure 2H,L**). The single coiling model was relatively  
225 mildly sensitive to variability in the synaptic weights and the rostrocaudal extent of the axon  
226 projections (**Figure 2G,I,K,M**).

227  
228 Overall, the model replicated this first locomotor behaviour of zebrafish in terms of the duration  
229 and frequency of coiling events as well as synaptic events of motoneurons. We then built upon this  
230 model to replicate the next step in the development of locomotion: the appearance of double  
231 coiling.

232  
233 *Double coiling depends on the timing and strength of contralateral excitation and inhibition*

234 After single coils appear, double coils emerge as a transitory locomotor behaviour at around 24  
235 hpf, coexisting with the single coiling behaviour (Knogler et al., 2014). Double coiling is  
236 characterized by two successive coils, one on each side of the body, and lasts about one second  
237 (Knogler et al., 2014). Eventually, double coiling becomes the predominant coiling behaviour.  
238 Double coiling can represent nearly three-quarters of all coiling events at its peak frequency, with  
239 the rest mainly being single coils (Knogler et al., 2014).

240  
241 At the stage when double coiling appears (24 dpf), the previous electrical scaffold for single coils  
242 seems to be supplemented with chemical glutamatergic synapses to form a hybrid electrical-  
243 chemical circuit (Knogler et al., 2014). Blocking glutamatergic transmission precludes double  
244 coils while sparing single coils (Knogler et al., 2014). In contrast, blocking glycinergic synapses  
245 led to triple or even quadruple coils (Knogler et al., 2014). These experimental observations  
246 suggest that synaptic excitation is required for successive coils after a first coil. Glycinergic

247 transmission seems to prevent the generation of more than two successive coils. Patch-clamp  
248 recordings of MNs at this developmental stage exhibit the same isolated PDs and SBs from earlier  
249 developmental stages and show mixed events in which a PD event immediately follows an SB or  
250 vice-versa (Knogler et al., 2014). Interestingly, the application of CNQX eliminates mixed PD-SB  
251 events but not single isolated SBs, suggesting that the coupling of PD and SB in mixed events is  
252 glutamatergic (Knogler et al., 2014). Therefore, we aimed to generate a model with the following  
253 characteristics: 1) double coils lasting about one second in duration accounting for over half of the  
254 coiling events, 2) a dependence of double coiling upon excitatory synaptic transmission, 3) an  
255 increase in multiple coiling events in the absence of inhibitory synaptic transmission, and 4) the  
256 presence of mixed PD-SB events with similar sensitivity to the blockade of excitatory synaptic  
257 transmission as double coils.

258

259 NETWORK DESCRIPTION (**Figure 3A**) To implement a model capable of generating double coils that  
260 depend upon glutamatergic transmission, we built upon the single coiling model by adding two  
261 populations of neurons. We reasoned that if double coiling depended upon excitatory  
262 neurotransmission, then a population of commissural excitatory neurons could be necessary to  
263 trigger a second contralateral coil in double coils. V0v neurons are a population of glutamatergic  
264 commissural interneurons, some of which may be involved in larger amplitude locomotor  
265 movements such as coiling (Jay & McLean, 2019). Thus, we added a chain of V0vs (ten neurons  
266 for each side) electrically coupled to the previous scaffold (i.e. the ipsilateral IC-MN-V0d  
267 scaffold). To generate the crossing excitation underlying the second coil, all V0vs projected  
268 glutamatergic synapses to contralateral ICs. Electrical synapses were formed with neighbouring

269 MNs, V0ds, and V0vs (the nearest three of each type of neuron in both the rostral and the caudal  
270 directions). Ipsilateral ICs were coupled with V0vs in the first four rostral somites.

271

272 The second population of neurons that we added were ipsilaterally projecting excitatory neurons  
273 present at this stage and shown to receive mixed PD-SB events (Knogler et al., 2014). These  
274 neurons have been suggested to be circumferential ipsilateral descending neurons that arise from  
275 the V2a population. In the model, V2as were electrically coupled to IC neurons and projected  
276 glutamatergic synapses to V0vs. This chemical synapse caused a delay after the initiation of the  
277 initial coil that facilitates the second contralateral coil (see below). V2as most likely also excite  
278 motoneurons, based on the data from Knogler et al. (2014). For computational simplicity, we  
279 omitted this connection as it was unnecessary for double coilings to be generated, though this may  
280 reduce the amplitude of the coils. As V2as display SBs at this stage, we modelled glycinergic  
281 projections from V0ds to contralateral V2as such that the  $i^{th}$  V0d projected to all contralateral V2as  
282 between the  $i-5$  and  $i+5$  segments like how V0ds project to contralateral MNs.

283

284 Left and right ICs received a tonic motor command though we delayed the activation of the tonic  
285 command to the right side by 1,500 ms to ensure that double coils were not near-coincident  
286 bilateral single coils. We modified several parameters of the ICs, most notably increases in the  $a$   
287 and the  $k$  parameters, to produce a more extended inter-coiling period (**Figure 3B**) than seen in  
288 single coiling (Knogler et al., 2014). A reminder that the  $a$  parameter represents the time scale of  
289 the recovery variable  $u$  that returns the membrane potential to rest. The  $k$  parameter shapes  
290 subthreshold dynamics.

291

292 SIMULATIONS RESULTS Simulations of the double coiling model frequently generated pairs of  
293 successive, left-right alternating coils lasting about one second in total (**Figure 3C, Figure 3 -**  
294 **video 1**). In five 100,000-ms long runs of the base model with a minimal amount of variability  
295 added to several model parameters ( $\sigma_d = 0.5$ ,  $\sigma_p = 0.01$ , and  $\sigma_w = 0.05$ ), approximately 60% of  
296 events were double coils, with the rest mainly being single coils (31%), and very few triple coils  
297 or truncated single coils (5% each) (**Figure 3I**).

298  
299 The timing of ICs, V2as, and V0vs (**Figure 3C**) suggest that double coils were generated by  
300 ipsilateral recruitment of V2as and V0vs during the first coil, which led to activation of the  
301 contralateral ICs to initiate the second coil. This sequence is supported by an analysis of the phase  
302 delays (**Figure 3D**). IC firing precedes the firing of all other ipsilateral spinal neurons suggesting  
303 they drive the activity of each coil. V2a activity precedes that of V0vs, which suggests that V2as  
304 recruit V0vs. This recruitment of V0vs by V2as is supported by simulations where the V2a to V0v  
305 synapse is removed (**Figure 3 - figure supplement 1A**). V0v activity succeeds all other ipsilateral  
306 spinal interneurons, suggesting they are the last interneurons active during the first coil in a double  
307 coiling event. A key to generating double coils in our model was thus to delay the activation of  
308 V0vs. This delay enabled the activation of contralateral ICs after the first coiling is completed and  
309 when commissural inhibition of the contralateral IC has also terminated. If the activation of  
310 ipsilateral V0vs occurred too early during the first coiling, which can be produced by increasing  
311 the weight of the V2a to V0v and the V0v to contralateral IC glutamatergic synapses, the  
312 occurrence of a second coil is less likely (**Figure 3E,I, Figure 3 - video 2**).

313

314 To further underscore the importance of glutamatergic transmission to double coiling as reported  
315 experimentally (Knogler et al., 2014), blocking glutamatergic transmission in the model greatly  
316 reduced the number of double coils (**Figure 3F,I, Figure 3 - video 3**). On the other hand, blocking  
317 glycinergic synapses increased multiple coilings of three or more coils (**Figure 3G,I, Figure 3 -**  
318 **video 4**) as Knogler et al. (2014) reported. This effect presumably occurs due to the unopposed  
319 reverberating commissural excitation of ICs by V0vs. Indeed, silencing V0v synapses in a model  
320 with no glycinergic synapses blocks double and multiple coils (**Figure 3 - figure supplement 1B**).

321  
322 The sequencing of commissural excitation and inhibition in the generation of double coils is further  
323 underscored by the presence of mixed SB-PD or PD-SB events (**Figure 3H**) observed  
324 experimentally in hyperpolarized MNs (Knogler et al. 2014). In these mixed events, the PDs were  
325 generated by gap junction coupled ICs during the ipsilateral coil, whereas contralateral V0ds  
326 activated during the contralateral coil generated the SBs in the ipsilateral MNs. Blocking  
327 glutamatergic transmission in our model uncoupled PDs and SBs (**Figure 3H**) as observed  
328 experimentally (Knogler et al. 2014).

329  
330 Just as the robustness of the single coiling model was tested through modifications to the base  
331 model and several sensitivity tests, we also tested the robustness of the double coiling model. First,  
332 we increased the size of the model from ten to thirty somites. Modifications of the tonic motor  
333 command amplitude, length of IC axons, gap junction coupling from IC to MN, and the synapses  
334 from MN to muscle cell, V0v to IC, V2a to V0v enabled the generation of double coils in this  
335 model (**Figure 3 - figure supplement 1C, Figure 3 - video 5**). In the ten-somite base model, we  
336 also tested the role of the glycinergic reversal potential. The value of this parameter was



337 hyperpolarized from -45 mV in the single coiling model to -58 mV in the base double coiling  
338 model. This shift was intended to reflect gradual hyperpolarization of the reversal potential of  
339 glycine during development (Ben-Ari, 2002, p.; Saint-Amant & Drapeau, 2000, 2001). We tested  
340 the double coiling model at values ranging between -46 to -70 mV (**Figure 3 - figure supplement**  
341 **2A**). We found that the proportion of double coils seemed to be higher, and the proportion of  
342 multiple coils was increased at more depolarized values of the glycinergic reversal potential. The  
343 proportion of double coils was relatively constant at more hyperpolarized values of the glycinergic  
344 reversal potential.

345  
346 To test whether the double coiling model was sensitive to within-model parameter variability, we  
347 ran sets of ten 100-s long simulations at various values of  $\sigma_d$ ,  $\sigma_l$ ,  $\sigma_p$ , and  $\sigma_w$  (**Figure 3J-M**). Again,  
348 we found that relatively small levels of variability in the parameters governing membrane  
349 dynamics ( $\sigma_p$ ) decreased the proportion of coiling events that were double coils and increased the  
350 number of truncated coils (**Figure 3L**). Moderate levels of variability in the parameters governing  
351 axonal length ( $\sigma_l$ ) or synaptic weight ( $\sigma_w$ ) decreased the proportion of double coils while  
352 increasing single coils and sometimes truncated coils (**Figure 3K,M**). The proportion of coiling  
353 events was largely unaffected by variability in the amplitude of the motor command ( $\sigma_d$ , **Figure**  
354 **3J**).

355  
356 Considering that the generation of double coils was sensitive to chemical synaptic activity and gap  
357 junctions (Knogler et al. 2014), we tested the sensitivity of the model to variability in the weights  
358 of only chemical synapses ( $\sigma_{w,chem}$ ) and only gap junctions ( $\sigma_{w,gap}$ ). We found that the proportion

359 of double coils was relatively more sensitive to the variability of gap junctions than chemical  
360 synapses (**Figure 3 - figure supplement 2B,C**).

361

### 362 *Generation of swimming pattern by spinal network oscillators*

363 Around 2 or 3 dpf, zebrafish transition from coiling movements to swimming (Drapeau et al.,  
364 2002; Saint-Amant & Drapeau, 1998). This transition entails two fundamental changes in  
365 locomotor movements: First, long, slow coils are replaced by quick, short tail beats; and secondly,  
366 the number of consecutive tail beats are increased from the two side-to-side coilings seen in double  
367 coils to multiple consecutive tail beats that compose each swimming episode. One of the emerging  
368 swimming movements is beat-and-glide swimming, characterized by short swimming episodes  
369 lasting several hundreds of ms separated by gliding pauses and lasting several hundreds of ms  
370 (Budick & O'Malley, 2000; Buss & Drapeau, 2001). Swim episodes consist of repetitive left-right  
371 alternating, low-amplitude tail beats that propagate from the rostral toward the caudal end of the  
372 fish body and are generated approximately at 20 to 65 Hz (Budick & O'Malley, 2000; Buss &  
373 Drapeau, 2001).

374

375 Beat-and-glide swimming can be produced in isolated larval zebrafish spinal cord preparations by  
376 NMDA application (Lambert et al., 2012; McDearmid & Drapeau, 2006; Wiggin et al., 2012) or  
377 by optogenetic stimulation of excitatory spinal neurons (Wahlstrom-Helgren et al., 2019). This  
378 capacity suggests that the transition from coiling to swimming involves a delegation of rhythm  
379 generation from ICs to spinal locomotor circuits (Roussel et al., 2020). Therefore, we sought to  
380 model a spinal network that could generate beat-and-glide swimming activity hallmarks - swim

381 episodes lasting about 200-300 ms with repeated left-right alternating low-amplitude tail beats at  
382 around 20-65 Hz – without relying on pacemaker cells.

383  
384 Recent experimental studies have also started to delineate the contributions of specific populations  
385 of spinal neurons to swimming. Ablation of ipsilaterally projecting, excitatory neurons in the V2a  
386 population eliminates swimming activity (Eklof-Ljunggren et al., 2012). Genetic ablation of  
387 ipsilaterally projecting, inhibitory neurons in the V1 population affects swim vigor but has no  
388 effects on the patterning of swimming (Kimura & Higashijima, 2019). Genetic ablation of a subset  
389 of commissural inhibitory neurons in the dI6 population reduces left-right alternation (Satou et al.,  
390 2020). We sought to replicate the role of these neurons in our model.

391  
392 NETWORK DESCRIPTION (**Figure 4A**) Whereas coiling is likely to be generated by primary  
393 motoneurons, swimming is more likely to involve secondary motoneurons (Ampatzis et al., 2013;  
394 D. W. Liu & Westerfield, 1988). There are more secondary than primary motoneurons, and new  
395 spinal neurons are born at the same time as secondary motoneurons (Bernhardt et al., 1990). To  
396 emulate the increase in the number of spinal neurons that may underlie swimming, we increased  
397 the size of the fish from ten to fifteen segments and accordingly increased the number of MNs,  
398 V0vs, and V2as from ten to fifteen. Thus, each model somite in our swimming model represented  
399 two biological somites instead of three in our coiling models. IC neurons were removed from the  
400 model to reduce computational load. We are not aware of any experimental evidence of the  
401 involvement of IC neurons in later swimming stages.

402

403 We introduced two populations of neurons for the beat-and-glide model. Commissural inhibitory  
404 CoBL neurons (including neurons from the dI6 and V0d populations) are active during swimming  
405 (Liao & Fetcho, 2008; Satou et al., 2020). V0d neurons were involved with faster swimming,  
406 whereas dI6s were more likely to be active during slower swimming (Satou et al., 2020).  
407 Therefore, we modelled CoBL neurons as dI6s. The dI6s thus replaced the V0ds in the coiling  
408 models as the source of contralateral inhibition in the swimming model. CoBL neurons have been  
409 shown to project to motoneurons, dI6s, and unidentified ipsilateral descending spinal neurons that  
410 could be V2as (Satou et al., 2020). We added fifteen dI6s per side. We modelled the projection  
411 pattern of dI6s based on the bifurcating axons with short ascending and long descending branches  
412 of a subset of neurons in the dI6 subpopulation (Satou et al., 2020). Thus, the  $i^{\text{th}}$  dI6s projected  
413 ascending branches to their rostral targets in the  $i-1$ th segment and projected descending branches  
414 to their caudal targets between the  $i+1$  and  $i+3$  segments.

415  
416 A second new population of neurons was the V1 interneurons that include circumferential  
417 ascending (CiA) interneurons that emerge during the second wave of neurogenesis in the spinal  
418 cord (Bernhardt et al., 1990). While V1 neurons were not included in the coiling models because  
419 their role in that form of movement is unclear, experiments in which the genetically identified V1  
420 neurons are ablated suggest a role in controlling swim vigor (Kimura & Higashijima, 2019). We  
421 thus modelled V1s as a population of tonic firing neurons with ipsilateral ascending glycinergic  
422 projections. We added fifteen V1s per side. We distributed V1s from segment 2 to the caudal end  
423 because our preliminary simulations suggested that starting the distribution of V1s at segment 1  
424 made the episode duration more variable. In our model, V1s project segmental and ascending  
425 ipsilateral glycinergic synapses with rostral V2as (Kimura & Higashijima, 2019), dI6s, and V0vs

426 (Sengupta et al., 2021) such that the V1s in the  $i^{\text{th}}$  segment project to their rostral targets in the  $i-1$   
427 to  $i-2$  segments. The V1 projections were short based upon recent evidence that their projections  
428 to motor circuits are constrained to segmental and immediately-neighbouring somites (Sengupta  
429 et al., 2021). Reciprocally, V2as formed glutamatergic synapses to caudally located V1.

430

431 V2as were considered the primary source of rhythmogenesis in our models of beat-and-glide  
432 swimming based on previous studies showing the necessity and sufficiency of V2a neurons to  
433 swimming activity (Eklof-Ljunggren et al., 2012; Ljunggren et al., 2014). In the swimming model,  
434 V2as projected segmental and descending projections to dI6s, MNs, V0vs, V1s, and caudal V2as  
435 (the  $i^{\text{th}}$  V2a projected to all caudal V0vs, dI6s, V2as, and MNs between the  $i+1$  and  $i+6$  segments).

436 Connections between V2as and V2as (Ampatzis et al., 2014; Menelaou & McLean, 2019; Song et  
437 al., 2020) and from V2a neurons to MNs (Ampatzis et al., 2014; Menelaou & McLean, 2019; Song  
438 et al., 2020) have been reported. Connections from V2as to dI6s have not been studied yet, and so  
439 we based them on the reported connections from V2a neurons to V0d neurons, another population  
440 of commissural inhibitory interneurons (Menelaou & McLean, 2019). A subtype of V2a neurons  
441 that project to MNs was shown to bifurcate and have short ascending branches (Menelaou &  
442 McLean, 2019), which we modelled in addition to an ascending V2a to V0v connection (the  $i^{\text{th}}$   
443 V2a projected to rostral V0vs and MNs in the  $i-1$  and  $i-2$  segments) that remains to be confirmed.

444

445 Less is known about the connection patterns of commissural excitatory neurons at larval stages.  
446 However, in adult zebrafish, V0v commissural excitatory neurons have been shown to have  
447 bifurcating axons with shorter ascending branches and longer descending branches (Björnfors &  
448 El Manira, 2016). We modelled V0vs to project only to contralateral V2as. The  $i^{\text{th}}$  V0vs projected

449 ascending branches to their rostral targets in the  $i-1^{\text{th}}$  segment and projected descending branches  
450 to their caudal targets between the  $i+1$  and  $i+3$  segments.

451  
452 Whether rhythmic motor commands from supraspinal commands generate rhythmic tail beats at  
453 the spinal cord level is unclear. There is evidence for rhythmic and tonic activity in reticulospinal  
454 neurons involved in swimming (Kimura et al., 2013). However, the isolated zebrafish spinal cord  
455 can generate rhythmic activity similar to swimming (McDearmid & Drapeau, 2006; Wahlstrom-  
456 Helgren et al., 2019; Wiggin et al., 2012, 2014). Therefore, in our model, V2as received a tonic  
457 motor command in the form of a DC current to test whether the rhythm and pattern of swimming  
458 could be generated solely from the activity of spinal circuits.

459  
460 Most spinal neurons at larval stages exhibit either tonic firing or firing with spike rate adaptation  
461 (Kimura & Higashijima, 2019; Menelaou & McLean, 2012, 2019; Satou et al., 2020), while a  
462 subset of motoneurons showing intrinsic burst firing (Menelaou & McLean, 2012). Therefore, we  
463 posited that the generation of rhythmic tail beats was not dependent upon the presence of  
464 intrinsically bursting neurons. Almost all of the neurons in the beat-and-glide swimming model  
465 were modelled to fire tonically (**Figure 4B**). Our base model was able to generate the beat-and-  
466 glide swimming pattern - alternating episodes of tail beats followed by silent inter-episode  
467 intervals each lasting hundreds of seconds - if V0vs were modelled to exhibit a more chattering or  
468 bursting firing pattern (**Figure 4B**).

469  
470 As the model is symmetrical, including the motor command, we found that the model produces  
471 synchronous left-right activity unless we introduced some variability in commissural connections.

472 With no *a priori* knowledge of where such variability could arise from, we chose to introduce a  
473 small amount of variability in the contralateral inhibition of dI6s by dI6s. The synaptic weights of  
474 this connection were scaled by a random number picked from a Gaussian distribution with mean,  
475  $\mu = 1$ , and standard deviation of 0.1, and this was sufficient to generate alternating left-right  
476 alternation. We did not seek to further characterize the variability required to generate left-right  
477 alternation.

478  
479 **SIMULATION RESULTS** The beat-and-glide swimming model exhibited short-duration (hundreds of  
480 ms) swimming episodes with left-right alternation and tail beat frequencies between 20-60 Hz  
481 (**Figure 4C-G, Figure 4 - video 1**). The characteristics of the swimming episodes in our  
482 simulations were close to those described for free swimming in larval zebrafish by Buss and  
483 Drapeau (2001), though the swimming output in our simulations had larger episode durations,  
484 shorter inter-episode intervals, and lower tail beat frequencies (**Table 1**).

485  
486 An analysis of the phase delay between neuron populations during beat-and-glide swimming in  
487 the base model shows that the activity of ipsilateral, glutamatergic V2as precedes the activity of  
488 all ipsilateral neurons (**Figure 4H**). This earlier firing of V2as suggests that these spinal neurons  
489 drive the activity of the ipsilateral spinal swimming circuit. On the other hand, the glycinergic V1  
490 neurons succeed all ipsilateral spinal neurons, suggesting they provide negative feedback to  
491 ipsilateral spinal swimming circuits. The contralateral dI6s and V0vs are out-of-phase with  
492 contralateral spinal neurons, consistent with their role in mediating left-right coordination. The  
493 longest delay between V2as and their ipsilateral counterparts was with the V0vs, which is  
494 reminiscent of V2a firing preceding V0v firing in the double coiling model to ensure a sufficient

495 delay for the initiation of the second coil. Thus, the generation of alternating left-right tail beats  
496 would seem to require a certain delay in the excitation of contralateral swimming circuits.

497  
498 To further investigate the role of specific neurons in the model's swimming activity, we performed  
499 simulations composed of three 5,000 ms long epochs: Epoch 1, where the model was intact; Epoch  
500 2, where we silenced the targeted neurons by removing their synaptic inputs; and Epoch 3, where  
501 the synaptic inputs to the targeted neurons were restored. Silencing V2as abolished the generation  
502 of tail beats (**Figure 5A-F, Figure 5 - figure supplement 1A-F**), underscoring their primacy to  
503 the generation of tail beats (Eklof-Ljunggren et al., 2012; Ljunggren et al., 2014). Commissural  
504 excitation mediated by V0vs seemed to be very important in maintaining the beat-and-glide  
505 pattern. Silencing V0vs diminished but did not eliminate the rhythmic firing of V2as or MNs.  
506 During Epoch 2, the tonic motor command continued to activate V2as. Pairs of left-right tail beats  
507 may result from the commissural inhibition by dI6s that was still present. However, removing the  
508 contralateral excitation by V0v prevented the repetitive activation of the silent side after each tail  
509 beat, which severely reduced episode duration and the number of tail beats generated in each  
510 episode (**Figure 5G-L, Figure 5 - figure supplement 1G-L, Figure 5 - video 1**). These  
511 simulations suggest that commissural excitation is necessary to repeatedly activate the silent  
512 contralateral side during ongoing swimming to ensure successive left-right alternating tail beats  
513 and longer swim episodes (Björnfors & El Manira, 2016; Saint-Amant, 2010).

514  
515 Genetic ablation of the ipsilaterally ascending inhibitory V1 interneurons increased swim vigor  
516 but produced no overt changes in swimming patterns (Kimura and Higashijima 2019). Consistent  
517 with those experimental results, simulating the removal of ipsilateral ascending inhibition by



518 silencing V1 interneurons seemed to increase the amplitude of motoneuron activity (**Figure 6A,B**,  
519 **Figure 6 - figure supplement 1A-F**, **Figure 6 - video 1**). While the overall beat-and-glide pattern  
520 persisted, the duration of episodes was increased, and inter-episode intervals were shortened  
521 between Epochs 1 and 2 (**Figure 6C,D**). Tail beat frequency was increased (**Figure 6E**). Left-right  
522 alternation was reduced in these simulations and during simulations where dI6s were silenced  
523 (**Figure 6F,G,L**, **Figure 6 - figure supplement 1G-L**). The reduction in left-right alternation  
524 during simulations where dI6s were silenced was greater in caudal somites than in rostral somites  
525 (**Figure 6L**). Note that while left-right alternation was reduced, this did not preclude left-right  
526 alternating tail beats from being generated (**Figure 6 - video 2**). The reduction of left-right  
527 coordination seen here was comparable to levels seen after genetic ablation of a commissural  
528 inhibitory subpopulation of dI6 interneurons (Satou et al., 2020) but is not sufficient to prevent  
529 left-right alternation. Since swimming is generated by rostrocaudal propagation of contractile  
530 waves, any left-right alternation in rostral segments will inevitably sway the rest of the body, as  
531 suggested by the musculoskeletal model. The precise kinematics of the tail beats will be affected  
532 by the reduction of left-right alternation observed (**Figure 6 - figure supplement 2**, **Figure 6 -**  
533 **video 2**). Finally, silencing dI6s had negligible effects on the episode duration and inter-episode  
534 interval but increased tail beat frequency when comparing Epochs 1 and 2 and may increase the  
535 amplitude of motor activity (**Figure 6H-K**).

536  
537 Previous experimental results showed that strychnine application disturbed swimming in the 20-  
538 40 Hz range at later stages of development (Roussel et al., 2020). Our model's behaviour to loss  
539 of glycinergic transmission was tested. Removal of all glycinergic transmission led to continual  
540 tail beats with minimal gliding periods (**Figure 7**). Motor output was increased during the epoch

541 of no glycinergic transmission (**Figure 7B**), episode duration was considerably lengthened, and  
542 the inter-episode interval was shortened (**Figure 7C-D**). The frequency of tail beats increased  
543 (**Figure 7E**). Left-right alternation was reduced, particularly at caudal somites (**Figure 7F**), which  
544 did not preclude left-right tail beats but altered swimming kinematics (**Figure 7 – figure**  
545 **supplement 1, Figure 7 - video 1**). These results indicate that removing glycinergic transmission  
546 in the model led to near-continuous swimming activity with altered kinematics and greater  
547 frequencies of tail beats.

548

549 We then proceeded to test the sensitivity of the base model to several model parameters. Since  
550 some V2a interneurons in adult zebrafish have pacemaker capacities (Song et al., 2020), we tested  
551 whether we could also generate beat-and-glide swimming in a model with bursting V2a (**Figure**  
552 **8A**). A model with bursting V2as where we also decreased the strength of synapses from V2as to  
553 other neurons and increased the connection strength of V0vs and dI6s to contralateral V2as (**Table**  
554 **4**) generated 100-400 ms swimming episodes of left-right alternating tail beats at frequencies  
555 around 20-80 Hz interspersed by 100-400 ms long silent inter-episode intervals (**Figure 8B-F**,  
556 **Figure 8 - video 1**). Surprisingly, a model with only tonic firing neurons (**Figure 8G**) was able to  
557 generate the hallmarks of beat-and-glide swimming as well (**Figure 8H-L, Figure 8 - video 2**).  
558 While there were eventually longer episodes with shorter inter-episode intervals after 6,000 ms,  
559 this simulation suggests that the architecture of the network is sufficient to generate beat-and-glide  
560 swimming for long periods despite the absence of any neurons with bursting properties.

561

562 We could generate beat-and-glide swimming in a thirty-somite and a ten-somite model (**Figure 8**  
563 **- figure supplement 1, Figure 8 - video 3**). We also examined the effects of changing the

564 glycinergic reversal potential that was set at -70 mV for the base beat-and-glide model (**Figure 8**  
565 **- figure supplement 2**). The glycinergic reversal potential was set at values between -72 mV and  
566 -56 mV (**Figure 8 - figure supplement 2A,B**). Episode duration was increased, and inter-episode  
567 intervals decreased at more depolarized values of the glycinergic reversal potential leading to the  
568 loss of the beat-and-glide pattern (**Figure 8 - figure supplement 2C**). Tail beat frequency also  
569 increased as glycinergic currents decreased at depolarized glycinergic reversal potentials, and left-  
570 right alternation was replaced by left-right synchrony (**Figure 8 - figure supplement 2D**).

571  
572 Finally, the sensitivity of the base model to variability was tested by running sets of ten 10,000-  
573 ms long simulations at various values of  $\sigma_d$ ,  $\sigma_l$ ,  $\sigma_p$ , and  $\sigma_w$ . We also performed ten 10,000-ms  
574 long simulations of the base model (a reminder that there is a random scaling factor to the dI6 to  
575 contralateral dI6 synapse in the base model). The episode duration, inter-episode interval, average  
576 tail beat frequency in each episode, and the minimum coefficient of the cross-correlation of the  
577 left and right muscle output were analyzed (**Figures 9 and 10**). Increases in variability in the motor  
578 command drive ( $\sigma_d$ ) seemed to affect inter-episode intervals and left-right alternation but not  
579 episode duration and tail beat frequency (**Figure 9A-D**). At similar levels of variability in  
580 rostrocaudal axonal length ( $\sigma_l$ ), all four measures of swimming activity were perturbed (**Figure**  
581 **9E-H**). On the other hand, variability in synaptic weights ( $\sigma_w$ ) affected only episode duration and  
582 inter-episode duration (**Figure 9I-L**).

583  
584 Smaller variability in the parameters shaping the membrane potential dynamics ( $\sigma_p$ ) disrupted the  
585 beat-and-glide pattern with no beat-and-glide swimming observed at some values of  $\sigma_p$  (**Figure**  
586 **10A,B**). As  $\sigma_p$  was increased, the episode duration, inter-episode interval, and tail beat frequency

587 were disrupted (**Figure 10C,D**). Even slight variability in the parameters shaping membrane  
588 potential dynamics (e.g.  $\sigma_p = 0.01$ ) resulted in changes in membrane excitability and, in some  
589 cases, firing patterns as evidenced by the conversion of some V0vs from burst to tonic firing  
590 (**Figure 10E**). Thus, the beat-and-glide model was most susceptible to variations in the parameters  
591 determining membrane potential dynamics and similarly sensitive to the other parameters tested.

592

## 593 **DISCUSSION**

594 To our knowledge, this study presents some of the first models of spinal locomotor circuits in  
595 developing zebrafish. We have built several spinal locomotor circuit models that generate  
596 locomotor movements of the developing zebrafish (**Figure 11**). These models support mechanisms  
597 of network operation of developing zebrafish spinal locomotor circuits described experimentally.  
598 Our models suggest that the circuitry driving locomotor movements could switch from a  
599 pacemaker kernel located rostrally during coiling maneuvers to network-based spinal circuits  
600 during swimming. Results from simulations where populations of spinal neurons are silenced were  
601 consistent with experimental studies. Our sensitivity analysis suggests that the correct operation  
602 of spinal circuits for locomotion is not immune to variations in firing behaviours, length of axonal  
603 projections, motor command amplitude, and synaptic weighting. The sensitivity to these  
604 parameters is variable, however.

605

### 606 *Pacemaker-based network for early behaviours*

607 The earliest locomotor behaviours in zebrafish, namely single and multiple coilings, require global  
608 recruitments of neurons to synchronously contract all ipsilateral muscles (Warp et al., 2012).  
609 Electrical coupling, which lacks the delays inherent with chemical neurotransmission, enables

610 these types of ballistic movements. Early locomotor behaviour in zebrafish seems to rely on this  
611 architecture, as demonstrated by the necessity of electrical but not chemical synapses (Saint-Amant  
612 & Drapeau, 2000, 2001). The rapid and multidirectional current transmission supported by  
613 electrical synapses is a perfect solution for en masse activation of a neural circuit (Bennett &  
614 Zukin, 2004). However, synchronous activation of an ensemble of neurons does not accommodate  
615 rhythmic activity, which requires more precise timing and connection strength. For example, the  
616 emergence of double coiling in our model was generated by chemical synaptic excitation of  
617 contralateral pacemaker neurons that had to be sufficiently delayed to enable the first coil to  
618 complete before initiating the second contralateral coil. Commissural glycinergic transmission was  
619 also required to tamper down coiling events with more than two successive coils. Suppose multiple  
620 coiling is a preparatory stage towards the emergence of repetitive, left-right alternating tail beats.  
621 In that case, the possible importance of contralateral excitation and inhibition at this stage presages  
622 the establishment of similar operational mechanisms to the generation of swimming.

623

#### 624 *Network oscillators for swimming movements*

625 To generate swimming, we delegated the generation of the rhythm driving tail beats to network  
626 oscillators distributed along the length of the spinal cord. Spinal locomotor circuits may transition  
627 away from pacemakers as the source of the rhythm to prevent being vulnerable to any flaws in the  
628 function of a small population of neurons. Also, there may be multiple local rhythms that control  
629 body oscillations along the developing zebrafish's length. Indeed, locomotor output has proven to  
630 be very robust to the sectioning of the spinal cord, leading to the suggestion that redundant rhythm-  
631 generating circuits must be present within the spinal cord (McDearmid & Drapeau, 2006; Wiggin  
632 et al., 2012, 2014). Experimental evidence from our lab further suggests that a transition from a

633 rhythm driven by a pacemaker kernel to a rhythm driven by local network oscillators occurs  
634 progressively from the caudal toward the rostral end of the body (Roussel et al., 2020).

635

636 The V2as are well recognized as the neural engine that drives swimming activity in zebrafish spinal  
637 circuits (Eklof-Ljunggren et al., 2012; Ljunggren et al., 2014). While some V2a interneurons have  
638 shown intrinsic burst firing in the adult zebrafish (Song et al., 2018, 2020), V2a interneurons in  
639 developing zebrafish show either tonic or modestly spike adapting firing (Menelaou & McLean,  
640 2019). We thus sought to generate beat-and-glide swimming with tonically firing V2as. Successive  
641 left-right alternating tail beats were generated by combining contralateral excitation from bursting  
642 commissural excitatory neurons to initiate alternating tail beats and contralateral inhibition to  
643 prevent co-contraction of both sides. In fact, a simulation with only tonic firing neurons could also  
644 generate beat-and-glide swimming over several seconds. Thus, V2as could very well drive  
645 rhythmic tail beats in larval zebrafish while firing tonically. If this is the case, then the central role  
646 of V2as depends less on their ability to produce a bursting rhythm. Instead, the pivotal role of V2as  
647 in enabling swimming activity would be to coordinate the many spinal interneuron populations  
648 that generate the patterns of repetitive, left-right alternating tail beats seen in developing zebrafish  
649 swimming (Saint-Amant, 2010). The observation that in our beat-and-glide simulation, V2a  
650 neuron firing phasically precedes firing of all the other intrasegmental spinal interneurons and  
651 motoneurons reinforces the central role of these neurons in driving rhythmic tail beats.

652

653 We did find that in simulations where there were only tonic firing neurons, the stability of  
654 swimming episode durations started degrading after about 6,000 ms. Therefore, burst firing  
655 neurons may help to promote the stability of the beat-and-glide pattern. Whether or not this is the

656 case remains to be tested experimentally. Neuromodulation may serve as a mechanism that permits  
657 V2as, or other spinal neurons, to toggle between tonic and burst firing through neuromodulation.  
658 It is well established that neuromodulators shape the activity of spinal locomotor circuits, likely  
659 by regulating intrinsic properties of spinal neurons and through modulation of synaptic weighting  
660 and other mechanisms. Blocking D4 dopamine receptors at 3 dpf prevents the transition from burst  
661 to beat-and-glide swimming (Lambert et al., 2012), suggesting that dopamine from supraspinal  
662 sources plays a role in setting the beat-and-glide phenotype by shortening swimming episode  
663 duration. Paired recordings of diencephalospinal dopaminergic neurons and spinal motoneurons  
664 during swimming show that these two populations often burst together (Jay et al., 2015). Later in  
665 development at 6-7 dpf, activation of D1 dopamine receptors increases the recruitment of slow  
666 motoneurons to increase swimming speed (Jha & Thirumalai, 2020). The neuromodulator  
667 serotonin (5-HT) has been found to either increase motor output by decreasing inter-episode  
668 intervals in intact larval zebrafish (Brustein, 2005; Brustein et al., 2003) or decrease swimming  
669 frequency or burst firing in spinalized larvae and adult zebrafish (Gabriel et al., 2009; Montgomery  
670 et al., 2018). In the adult zebrafish, serotonin strengthens inhibition to motoneurons between tail  
671 beats and slows down the onset of the depolarization that initiates each successive tail beat (Gabriel  
672 et al., 2009). Our model could identify possible targets within the spinal cord for specific  
673 neuromodulators of locomotor function in zebrafish.

674

### 675 *Modelling considerations*

676 Our sensitivity analysis suggests that the neuromodulation of intrinsic properties that affect the  
677 membrane potential dynamics of spinal neurons could easily modulate locomotor output. The  
678 behaviour of our models was also sensitive to a lesser degree to increasing variability in descending

679 drive, synaptic weighting, and rostrocaudal extent of connections. Variability in these parameters  
680 could change the proportions of coiling types or the values of the characteristics of swimming  
681 output measured (e.g. episode duration, inter-episode interval). Model parameter variability  
682 sometimes increased the variability of motor output (e.g. **Figure 10**), perhaps indicating a  
683 breakdown of the model. However, variability in both model parameters and motor output should  
684 not necessarily be considered weaknesses of the model but may instead reflect true biological  
685 variability (Marder & Taylor, 2011). For instance, recordings of swimming characteristics such as  
686 episode duration and inter-episode intervals in larval zebrafish show appreciable variation  
687 (Brustein, 2005; Buss & Drapeau, 2001). Quantifying heterogeneity within and between animals  
688 may guide the appropriate levels of parameter variability to include in future iterations of our  
689 models.

690  
691 Many computational models have already been made of spinal circuits for swimming in species  
692 that use undulatory movements spreading from head to tail. These include models for *Xenopus*  
693 (Ferrario et al., 2018; Hull et al., 2016), lamprey (A. Kozlov et al., 2009; A. K. Kozlov et al., 2014;  
694 Messina et al., 2017), and salamanders (Bicanski et al., 2013; Ijspeert et al., 2007). These models  
695 have become detailed enough to include many neurons forming circuits distributed across the  
696 hindbrain and the spinal cord. Some models incorporate specific intrinsic and ligand-gated currents  
697 with known roles in rhythmogenesis in their respective species (Ferrario et al., 2018; A. Kozlov et  
698 al., 2009; A. K. Kozlov et al., 2014). Simulations of the models have been used to test aspects of  
699 swimming control, including steering commands from descending commands to spinal networks  
700 (A. K. Kozlov et al., 2014), the integration of sensory triggers of flocmotion (Ferrario et al., 2018;  
701 Ijspeert et al., 2007), the coupling of axial and limb central pattern generators (Ijspeert et al., 2007),



702 and the role of left-right coupling in rhythm generation (Messina et al., 2017). Our model could be  
703 used to identify possible similarities or differences in how these aspects of motor control are  
704 controlled in the zebrafish.

705

### 706 *Testable Predictions*

707 To the best of our knowledge, this is the first model to generate several forms of locomotor  
708 movements in developing zebrafish based upon previously described neurons and their  
709 connectivity patterns. The analysis of the simulations generated yielded several predictions about  
710 possible connections between spinal neurons, firing properties of neurons, and roles for neurons  
711 in specific locomotor movements. For instance, the single coiling model predicts that IC and V0d  
712 are coupled together to facilitate the activation of V0ds, which are responsible for the glycinergic  
713 synaptic bursts observed in spinal neurons at this stage (Saint-Amant & Drapeau, 2001; Tong &  
714 McDearmid, 2012).

715

716 Our modelling study also predicts that the generation of double and even multiple coils depend on  
717 untested connections between V2a to V0v neurons and between V0v to IC neurons. The latter  
718 connection would be needed to initiate consecutive left-right alternating coils through the  
719 activation of contralateral IC neurons, while the former connection would be needed to activate  
720 the ipsilateral V0v responsible for the activation of contralateral ICs. The V2a to V0v connection  
721 could be deemed unnecessary in light of possible gap junction coupling between ipsilateral IC and  
722 V0vs. However, our modelling suggests that delayed activation of V0vs would allow the ipsilateral  
723 coil to complete before activating the contralateral coil. This delay would not be possible with gap  
724 junction mediated excitation of V0vs by ipsilateral ICs. Our double-coiling model also predicts

725 that contralateral inhibition of ICs by V0ds prevents the generation of multiple coilings. Several  
726 of these predictions are supported by pharmacological experiments suggesting that blocking  
727 glutamatergic transmission in embryonic zebrafish precludes double coiling while blocking  
728 glycinergic transmission at that stage promotes multiple coilings (Knogler et al., 2014).

729  
730 The beat-and-glide model also proposes a prominent role of delayed contralateral excitation in  
731 ensuring repetitive left-right alternating tail beats during swimming. Whether delayed contralateral  
732 excitation is a conserved mechanism of operation in double coiling and swimming remains to be  
733 tested experimentally. While V0v neurons are the likely candidate to mediate the activation of  
734 contralateral movements, different subgroups of V0v neurons are probably involved in coiling  
735 versus swimming (Björnfors & El Manira, 2016; Jay & McLean, 2019) considering the two  
736 different targets of contralateral excitation involved, namely ICs in coiling and V2as in swimming.  
737 The continued presence of left-right tail beats in simulations where the dI6 population of  
738 commissural inhibitory neurons were silenced or in simulations with blockade of glycinergic  
739 transmission further underscores the need to test the contributions of V0v neurons to left-right  
740 alternation.

741  
742 Finally, the ability of our model to generate beat-and-glide swimming with or without burst firing  
743 neurons suggests a possible degeneracy in the operation of spinal swimming circuits of the  
744 developing zebrafish. This possibility would be consistent with the well-characterized degeneracy  
745 of the nervous system, as reinforced by modelling studies where combinations of intrinsic  
746 properties or connectivity can generate the same motor output (Goldman et al., 2001; Taylor et al.,  
747 2009). Many rhythmogenic currents (e.g. NMDA, calcium-dependent potassium currents,

748 persistent sodium currents) have been implicated in the operation of locomotor circuits of zebrafish  
749 (Song et al., 2020) and other invertebrate and vertebrate rhythm-generating circuits (Anderson et  
750 al., 2012; Golowasch & Marder, 1992; Ryczko et al., 2010; Tazerart et al., 2007; Zhong et al.,  
751 2007). In addition, while some motor systems rely upon pacemaker neurons, other rhythmic motor  
752 systems could also rely on network-based mechanisms (Del Negro et al., 2010), further  
753 demonstrating the diversity of means by which the nervous system generates rhythmic activity.  
754 Whether the spinal circuits for swimming are degenerate or degeneracy is only exhibited in our  
755 modelling remains to be tested experimentally. The operation of the spinal swimming circuit in  
756 zebrafish may exhibit degeneracy dependent upon specific environmental or physiological  
757 conditions (Vogelstein et al., 2014) and their resulting neuromodulatory states.

758

### 759 *Future directions*

760 Our models will require integrating additional cell populations and circuitry to capture the full  
761 range of locomotor movements of developing zebrafish. The beat-and-glide model only generates  
762 swimming within a narrow frequency range. The generation of a broader range of swimming  
763 frequency (McLean & Fetcho, 2009) will require expanding each cell population into subgroups  
764 with different intrinsic properties (Menelaou & McLean, 2012; Song et al., 2018), rostrocaudal  
765 projection patterns, and specific connectivity patterns between subgroups and between cell  
766 populations (Ampatzis et al., 2014; Bagnall & McLean, 2014; Kimura & Higashijima, 2019;  
767 Menelaou & McLean, 2019; Sengupta et al., 2021; Song et al., 2020). These subgroups, which  
768 may arise from different birth dates (McLean & Fetcho, 2009; Satou et al., 2012), are active at  
769 specific swimming frequencies (McLean et al., 2007, 2008; McLean & Fetcho, 2009). There seem  
770 to be modules consisting of neurons within each cell population that are active at specific swim

771 frequencies (Ampatzis et al., 2014; Menelaou & McLean, 2019; Song et al., 2018, 2020). Indeed,  
772 previous studies in zebrafish have shown that MNs and V2a neurons are organized in three  
773 different modules (linked to slow, medium, and fast MNs) that are differentially recruited  
774 according to swim frequency (Ampatzis et al., 2014; Song et al., 2020). Swim frequency modules  
775 likely include commissural excitatory V0v interneurons (Björnfors & El Manira, 2016; McLean  
776 et al., 2008) and commissural inhibitory interneurons belonging to either the dI6 or V0d  
777 populations (Satou et al., 2020). The modelling of additional subgroups, especially in the context  
778 of swim-frequency modules, will need to take into account the high specificity of connectivity  
779 between subgroups within a cell population (Menelaou & McLean, 2019; Song et al., 2020) and  
780 subgroups belonging to different spinal populations within swim frequency-modules (Ampatzis et  
781 al., 2014; Bagnall & McLean, 2014; Menelaou & McLean, 2019; Song et al., 2020).

782  
783 Subgroups within cell populations are not necessarily restricted to those belonging to different  
784 swim frequency modules but may also exist between neurons involved in rhythm versus vigor of  
785 movement. Subgroups for vigor seem to be present within the V2a (Menelaou & McLean, 2019;  
786 Song et al., 2018) and V0v (Björnfors & El Manira, 2016; Jay & McLean, 2019; McLean et al.,  
787 2007) populations. Furthermore, the implementation of circuitry for swimming vigor is likely to  
788 necessitate adding the ipsilaterally projecting, inhibitory V2b population (Callahan et al., 2019).  
789 The circuits for frequency and vigor are likely to interact, as seen by the swimming frequency-  
790 dependent action of V1 neurons (Kimura & Higashijima, 2019). Frequency and vigor are also  
791 likely to be shaped by sensory information. Incorporating spinal neurons that integrate sensory  
792 information (Y. C. Liu & Hale, 2017) provided by peripherally-located and spinally-located

793 sensory neurons (Böhm et al., 2016; Picton et al., 2021) will provide a more accurate representation  
794 of swimming control at the level of the spinal cord.

795  
796 Finally, the undefined role of specific spinal neuron populations could be studied after being  
797 integrated into the model following further characterization. For example, ventral V3 neurons in  
798 mouse spinal locomotor networks have been studied using modelling. Those studies suggest an  
799 important role for these neurons in left-right coordination in mouse locomotion (Danner et al.,  
800 2019). Similar computational studies using our model could reveal testable predictions of the role  
801 of these neurons (England et al., 2011; Yang et al., 2010) in zebrafish swimming.

802  
803 Our models simulate several developmental milestones of the zebrafish locomotor behaviour.  
804 Iterative changes were made to each model to successively transition from single coiling to double  
805 coiling and then to beat-and-glide swimming. This iterative process could be further developed to  
806 obtain a higher resolution understanding of the maturation of locomotion in zebrafish. Further  
807 transitory models could be built to fill the gaps between our current models (e.g. a model for burst  
808 swimming that precedes beat-and-glide swimming). The generation of these additional transitory  
809 models could be coupled with experimental data studying the mechanisms that drive the transition  
810 from one milestone to the other (Brustein, 2005; Knogler et al., 2014; Lambert et al., 2012; Roussel  
811 et al., 2020) to identify specific underlying changes in intrinsic and network properties. Thus, the  
812 models presented herein offer invaluable tools to investigate further the mechanisms by which  
813 spinal circuits control facets of swimming, including speed, direction, and intensity through  
814 interactions within the spinal cord and with supraspinal command centres, as well as the  
815 developmental dynamics that ensure proper maturation of movement during development.

## 816 MATERIALS AND METHODS

817

### 818 *Modelling environment*

819 Modelling was performed using Python 3.6.3 64-bits. We did not analyze the early parts of  
820 simulations (up to 200 ms) to allow the effects of initial conditions to dissipate.

821

### 822 *Modelling of single neurons*

823 We modelled neurons using a single compartment, simple spiking neuron model developed by  
824 Izhikevich (2007). The following general differential equations govern the dynamics of the  
825 membrane potential:

826

$$827 \quad CV' = k(V - V_r)(V - V_t) - u + I_{syn},$$

$$828 \quad u' = a(b(V - V_r) - u), \tag{1}$$

$$829 \quad \text{if } V = V_{max}, \text{ then } V \leftarrow c, u \leftarrow u + d$$

830

831 Specific active conductances are not included in these models. Instead, values of the parameters  $a$ ,  
832  $b$ ,  $c$ ,  $d$ , and  $V_{max}$  (which respectively represent the time scale of the recovery variable  $u$ , the  
833 sensitivity of  $u$  to the sub-threshold variation of  $V$ , the reset value of  $V$  after a spike, the reset value  
834 of  $u$ , and the action potential peak), as well as values of the parameters  $k$ ,  $C$ ,  $V_r$ , and  $V_t$  (coefficient  
835 for the approximation of the subthreshold part of the fast component of the current-voltage  
836 relationship of the neuron, cell capacitance, resting membrane potential, and threshold of action  
837 potential firing) can be selected to model a wide range of firing behaviours including bursting (or  
838 chattering) pacemaker, tonic firing, phasic spiking neurons or firing rate adaptation neurons (**Table**

839 2).  $I_{syn}$  represents the sum of the synaptic and gap junction currents received by the neuron. For all  
840 models, the Euler method was used for solving ordinary differential equations with a time step of  
841 0.1 ms.

842

### 843 *Modelling synapses*

844 We modelled all electrical synapses (i.e. gap junctions) as ideal resistors following Ohm's Law:

845

$$846 \quad I_{gap:pre,post} = V_{pre} G_{pre,post} \quad (2)$$

847

848 With  $I_{gap:pre,post}$  representing the synaptic current flowing to the postsynaptic neuron from the  
849 presynaptic neuron through gap junctions and  $G_{pre,post}$  the total conductance of gap junctions  
850 between the presynaptic and postsynaptic neurons (**Table 3**).

851

852 Synaptic conductances of chemical synapses were modelled as a sum of two exponentials weighted  
853 by a synaptic weight based upon the general equation:

854

$$855 \quad I_{pre,post} = (V_{post} - E_{rev}) \left( e^{-\frac{t-t_0}{\tau_r}} - e^{-\frac{t-t_0}{\tau_f}} \right) W_{pre,post} \quad \text{if } V_{pre} > V_{thr} \quad (3)$$

856

857 Where  $I_{pre,post}$  is the synaptic current received by the postsynaptic neuron from neurotransmitter  
858 release by the presynaptic neuron if the presynaptic neuron membrane potential,  $V_{pre}$ , crosses a  
859 voltage threshold,  $V_{thr}$ , at the synapse.  $V_{post}$  is the membrane potential of the postsynaptic neuron,  
860  $E_{rev}$  is the reversal potential,  $\tau_r$  and  $\tau_f$  are the rise and fall time constants, respectively,  $t_0$  is the time

861 at which  $V_{pre}$  crossed  $V_{thr}$ , and  $W_{pre,post}$  is the synaptic weight between the presynaptic and  
862 postsynaptic neurons (**Table 4**).  $I_{pre,post}$  is equal to 0 if  $V_{pre}$  is below  $V_{thr}$ .

863

864 We implemented two types of chemical synapses: glutamatergic and glycinergic synapses. The  
865 former differs from the latter by the respective reversal potential values  $E_{rev}$  of glutamatergic and  
866 glycinergic synapses and the time constant values  $\tau_r$  and  $\tau_f$  (**Table 5**). Values of the glycinergic  
867  $E_{rev}$  are depolarized at early developmental stages (Saint-Amant & Drapeau, 2000, 2001), and this  
868 reversal potential becomes gradually hyperpolarized (Ben-Ari, 2002). All chemical synapses were  
869 turned off in the initial 50 ms of every simulation to allow initial conditions to dissipate.

870

### 871 *Spatial arrangement of spinal neurons*

872 A key feature of our modelling approach was to assign spatial coordinates  $(x, y)$  to point-like  
873 neurons (i.e. neurons have no spatial dimension, but they have a position in space), giving the  
874 spatial distribution of neurons a central place in our model computing process. We used the  
875 Euclidean distance to calculate the distance between each neuron and to approximate axon length.  
876 Distance unit is arbitrary and was set so that one model somite was 1.6 arbitrary distance units  
877 (a.d.u.) long. Time delays for each synaptic connection were computed as a function of the distance  
878 between neurons and were used to calculate delayed synaptic current:

879

$$880 \quad I_{delayed:pre,post}(t) = I_{pre,post}\left(t - \frac{D_{pre,post}}{cv}\right) \quad (4)$$

881

882 With  $D_{pre,post}$  as the Euclidean distance between the presynaptic and postsynaptic neurons and  $cv$   
883 as the transmission speed in arbitrary distance units per second (a.d.u./s). This distance and the



884 neuron position were also used to apply conditions on synaptic weights of neurons (e.g. limits as  
885 to how far descending neurons project). For the single coiling model,  $cv$  was set to 4.0 a.d.u/s. For  
886 the multiple coiling model,  $cv$  was set to 1.0 a.d.u/s. These values were obtained through trial-and-  
887 error and may reflect changes in myelination and body size of the developing zebrafish. For the  
888 beat-and-glide swimming model,  $cv$  was set to 0.8 a.d.u/s, which led to intersegmental  
889 transmission delays in the range of 3.0-4.0 ms, closely matching the 1.6 ms intersomitic delay  
890 previously reported (McDermid & Drapeau, 2006), assuming that each model somite represents  
891 two biological somites at this developmental stage (see *Musculoskeletal model* below).

892  
893 Spinal locomotor circuits were distributed across two columns, one for each side of the body,  
894 giving the network a nearly one-dimensional organization along the rostrocaudal axis. Therefore,  
895 we used the  $x$ -axis as the rostrocaudal axis, whereas the  $y$ -axis was only used to partition neurons  
896 from the left and right sides (assigning the coordinate  $y = 1$  a.d.u. for the right side and  $y = -1$   
897 a.d.u. for the left side).

898

### 899 *Sensitivity testing*

900 We scaled key parameters to Gaussian noise to test the robustness of our three base models (single  
901 coiling, multiple coiling, and beat-and-glide swimming) to parameter variability. Sensitivity to  
902 noise of the base models was tested by scaling the parameters that set the tonic motor command  
903 drive's amplitude, the rostrocaudal length of neuron projections, the membrane potential dynamics  
904 (Izhikevich model), and synaptic weighting. These four sets of parameters were randomized by  
905 multiplying the parameters with a random number picked from a Gaussian distribution with mean,  
906  $\mu = 1$ , and standard deviations,  $\sigma_d$ ,  $\sigma_l$ ,  $\sigma_p$ , and  $\sigma_w$ , respectively. The amplitude of the motor

907 command drive was randomized at each time point. The parameters for the membrane potential  
908 dynamics, rostrocaudal length of axons, and synaptic weights were randomized at the start of each  
909 simulation and did not change during the simulations.

910

### 911 *Musculoskeletal model*

912 We implemented a musculoskeletal model of the fish body to convert the output of the spinal  
913 circuit model into changes in body angles and frequency of locomotor movements. Each MN  
914 output along the fish body was inputted into a muscle cell (**Figure 1**). The membrane potential of  
915 the muscle ( $V$ ) was modelled as a simple passive RC circuit ( $R$  and  $C$  being the muscle cell  
916 membrane resistance and capacitance, respectively), described by the following equation:

917

$$918 \quad V'_{muscle} = \frac{V}{RC} + \frac{I_{syn}}{C} \quad (5)$$

919

920 For muscle cells, values of  $R$  were 25 (single coiling), 50 (double coiling), and 1 (beat-and-glide);  
921 values of  $C$  were 10 (single coiling), 5 (double coiling), and 3 (beat-and-glide). These values were  
922 chosen to produce kinematics representative of those seen experimentally. To reduce  
923 computational load, we modelled one muscle cell as representing three somites of the body in the  
924 base model for coiling and two somites of the body in the base model for swimming. The whole  
925 body of the fish was modelled as a chain of uncoupled damped pendulums. We computed local  
926 body angles according to the difference in activity between the local left and right muscle cells.  
927 The deflection angle  $\theta_i$  of the  $i^{\text{th}}$  muscle cell was computed according to the following differential  
928 equation.

929

930  $\theta_i'' + 2\zeta\omega_0\theta_i' + \omega_0^2\theta_i = \alpha(1 - 0.2R)(V_{Rmuscle,i} - V_{Lmuscle,i})$  (6)

931

932 With  $V_{Rmuscle,i}$  and  $V_{Lmuscle,i}$  being the solution of the equation (5) for the  $i^{\text{th}}$  muscle on the right  
933 and left side of the body, respectively (**Figure 1D**).  $\alpha$  is the conversion coefficient from an electric  
934 drive of the muscle cells to a mechanical contraction of the same cells. The midline of the body  
935 can be computed at any given time as  $(x,y)$  coordinates using trigonometric identities from  $\theta_i$   
936 (**Figure 1E**). Specifically,

937

938  $x_i = x_{i-1} + l \cdot \sin(\theta_i)$  and

939  $y_i = y_{i-1} - l \cdot \sin(\theta_i)$  (7)

940

941 where  $(x_i, y_i)$  are the spatial coordinates of the  $i^{\text{th}}$  somite, and  $l$  is its length. We set  $(x_0, y_0)$  to  
942  $(0, 0)$  and applied the previous set of equations (7) for  $i \geq 1$ . Thus, heat-maps of local body angle  
943 ( $\theta_i$ ) variation through time provide comprehensive information about the network output (**Figure**  
944 **1F**). The integrated motor output of the model (for example, **Figure 5B**) was calculated as the sum  
945 of the muscle output at all muscle cells on both sides of the body, followed by a convolution of  
946 this sum with a 50 ms square wave. Left-right alternation at the  $i^{\text{th}}$  somite was analyzed using  
947 cross-correlation of  $V_{Rmuscle,i}$  and  $V_{Lmuscle,i}$  at that somite. The minimum coefficient in the range  
948 of time delays between -20 and 20 ms was calculated to estimate left-right alternation. A value of  
949 0 indicates left-right out-of-phase alternation, while a value of 1 suggests complete in-phase  
950 synchrony.

951

952 *Analysis of locomotor activity*

953 To calculate the duration of swimming episodes, we summated the muscle activity across all  
954 somites from both sides of the body. This muscle activity was then convoluted, and a threshold of  
955 0.5 arbitrary units was set to detect the start and end of each swimming episode of most  
956 simulations. In a few simulations where motor output was very large, the threshold was adjusted  
957 to detect episodes. To estimate the tail beat frequency, we determined when the most caudal somite  
958 crossed the midline of the body of the musculoskeletal model (a threshold of 0.5 arbitrary units  
959 from the center was used to detect crossing to a side of the body). The reciprocal of the interval  
960 between consecutive left-to-right or right-to-left crossing was used to calculate the instantaneous  
961 tail beat frequency. Any interval greater than 100 ms was considered to be between episodes rather  
962 than within an episode and discarded from the calculation of instantaneous tail beat frequency.

963  
964 To calculate the phase delay between pairs of neurons in the beat-and-glide swimming model, we  
965 first calculated the autocorrelation of the reference neuron. The time delay at which the peak  
966 autocorrelation occurred was used to estimate the period of the reference neuron cycle. The cross-  
967 correlation between the reference and test neuron was then calculated, and the phase delay was  
968 calculated as the time delay at which the peak of the cross-correlation occurred divided by the  
969 cycle period of the reference neuron in radians. In the coiling models, the cycle period is 1,000-  
970 2,000 ms (single coiling) or 10,000-20,000 ms (double coiling) due to longer inter-coiling  
971 intervals. Normalizing phase shifts by this cycle period makes the phase delays very small.  
972 Therefore, for the coiling models, the period of the reference neuron cycle was estimated by the  
973 average duration of single coiling or double coiling events. Note that this procedure does not  
974 change the polarity of the phase delay but better separates the various phase delays on a polar plot.  
975

976 *Statistical Analysis*

977 Statistical analysis was performed using the SciPy Python library. Statistical tests consisted of one-  
978 factor ANOVA tests followed by two-tailed Student's t-tests. A p-value < 0.05 was used to  
979 determine statistical significance, and all tests were corrected for multiple comparisons  
980 (Bonferroni correction for multiple t-tests).

981

982 *Availability of code*

983 The code for the models can be accessed at <https://github.com/bui-lab/code> (pending acceptance  
984 of the manuscript). Updates and revisions to the models will also be made available at this site.

985

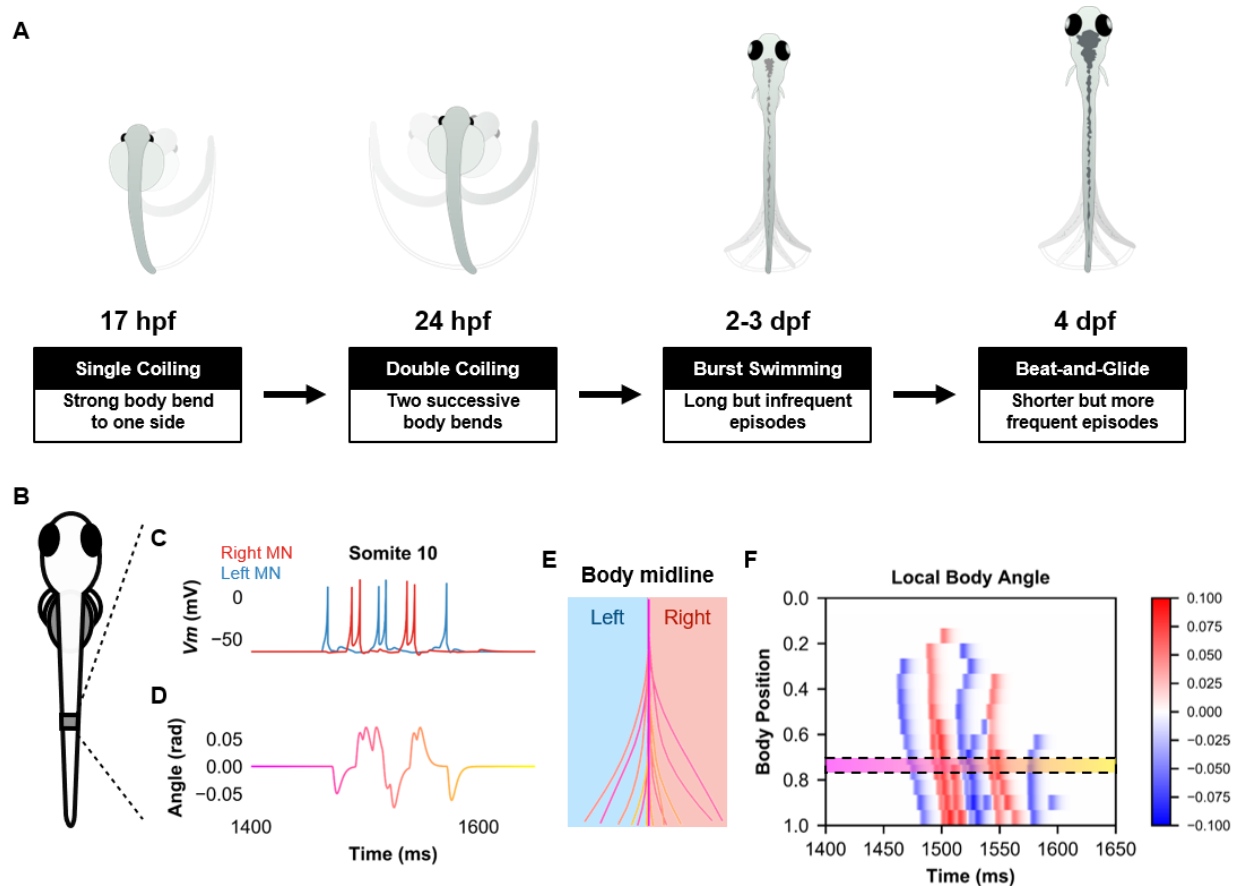

986  
987  
988  
989  
990  
991  
992  
993  
994  
995  
996  
997  
998  
999

**Figure 1. Simulation of the spinal locomotor circuit coupled to a musculoskeletal model during a beat-and-glide swimming episode.** (A) Schematic of locomotor movements during the development of zebrafish. (B) Schematic of a fish body with 10<sup>th</sup> somite outlined. (C) Motoneuron membrane potential ( $V_m$ ) in the 10<sup>th</sup> somite during a single beat-and-glide swimming episode from our model is used to calculate this body segment's body angle variation (D) in a musculoskeletal model. (E) Several representative body midlines from this episode of beat-and-glide swimming. Body midline is computed by compiling all the calculated local body angles along the simulated fish body. (F) Heat-map of local body angle (in radians) across the total body length and through time during the episode. Red is for right curvatures, while blue labels left curvatures. Body position on the ordinate, 0 is the rostral extremity, while 1 is the caudal extremity. In D-F, the magenta to yellow color coding represents the progression through the swimming episode depicted.

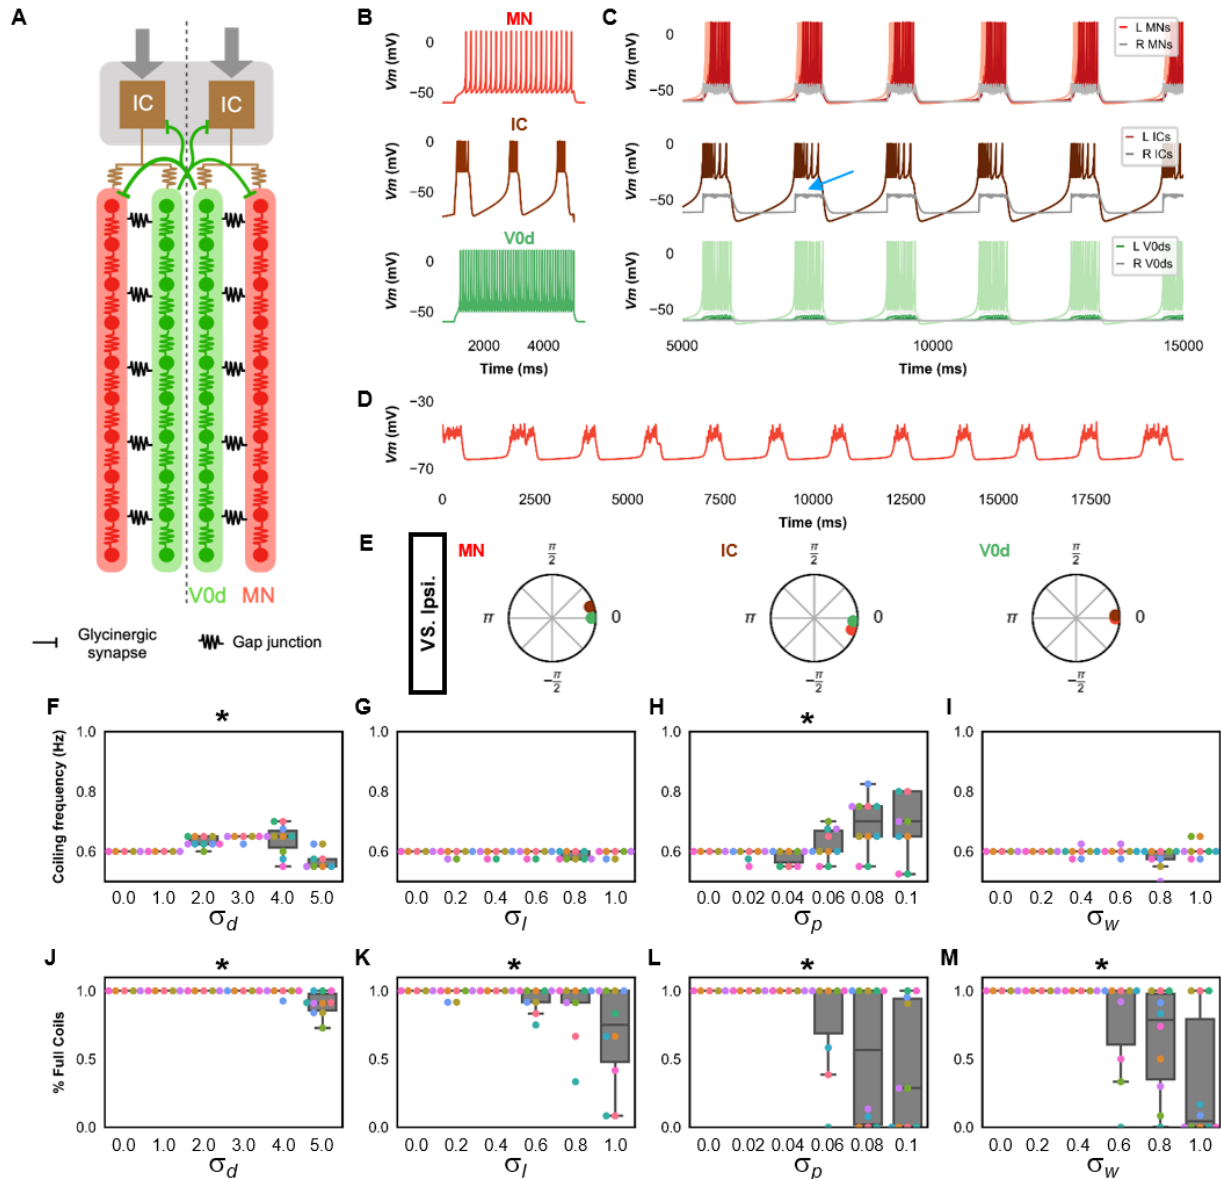

1000  
1001  
1002  
1003  
1004  
1005  
1006  
1007  
1008  
1009  
1010  
1011

**Figure 2. Single coiling model driven by pacemaker neurons.** (A) Schematic of the single coiling model. The dashed line indicates the body midline. Gray arrows indicate descending motor command. (B) Membrane potential ( $V_m$ ) response of isolated spinal neuron models to a depolarizing current step. (C)  $V_m$  of spinal neurons during a simulation with a tonic command to left pacemakers only. Note the synaptic bursts in grey in the right MNs and IC neurons (a blue arrow marks an example). The  $V_m$  of a rostral (lightest), middle, and caudal (darkest) neuron is shown, except for IC neurons that are all in a rostral kernel. (D) Periodic depolarizations in a hyperpolarized motoneuron on the same side where single coils are generated. (E) The phase delay of left neurons in relation to ipsilateral spinal neurons in the 1st somite and an IC in the rostral kernel in a 10,000 ms simulation. The reference neuron for each polar plot is labelled, and all neurons follow the same color-coding as the rest of the figure. A negative phase delay

1012 indicates that the reference neuron precedes the neuron to which it is compared. A phase of 0  
1013 indicates that a pair of neurons is in-phase; a phase of  $\pi$  indicates that a pair of neurons is out-of-  
1014 phase. Sensitivity testing showing (F-I) coiling frequency and (J-M) proportion of full coils  
1015 during ten 20,000 ms simulation runs at each value of  $\sigma_d$ ,  $\sigma_l$ ,  $\sigma_p$ , and  $\sigma_w$  tested. Each run is  
1016 color-coded. L: left, R: right. **Statistics:** Asterisks denote significant differences detected using a  
1017 one-factor ANOVA test. (F)  $F_{5,59} = 10.4$ ,  $p = 5.2 \times 10^{-7}$ . (G)  $F_{5,59} = 2.4$ ,  $p = 0.05$ . (H)  $F_{5,59} = 5.2$ ,  
1018  $p = 0.0006$ . (I)  $F_{5,59} = 2.2$ ,  $p = 0.07$ . (J)  $F_{5,59} = 10.9$ ,  $p = 2.7 \times 10^{-7}$ . (K)  $F_{5,59} = 4.9$ ,  $p = 0.0009$ .  
1019 (Note that there were no pairwise differences detected). (L)  $F_{5,59} = 6.5$ ,  $p = 8.2 \times 10^{-5}$ . (M)  $F_{5,59} =$   
1020  $8.8$ ,  $p = 3.5 \times 10^{-6}$ . P-values for t-tests are found in **Figure 2 - supplementary table 1**.  
1021 See also **Figure 2 - figure supplement 1** and **2** and **Figure 2 - video 1** and **2**.  
1022  
1023



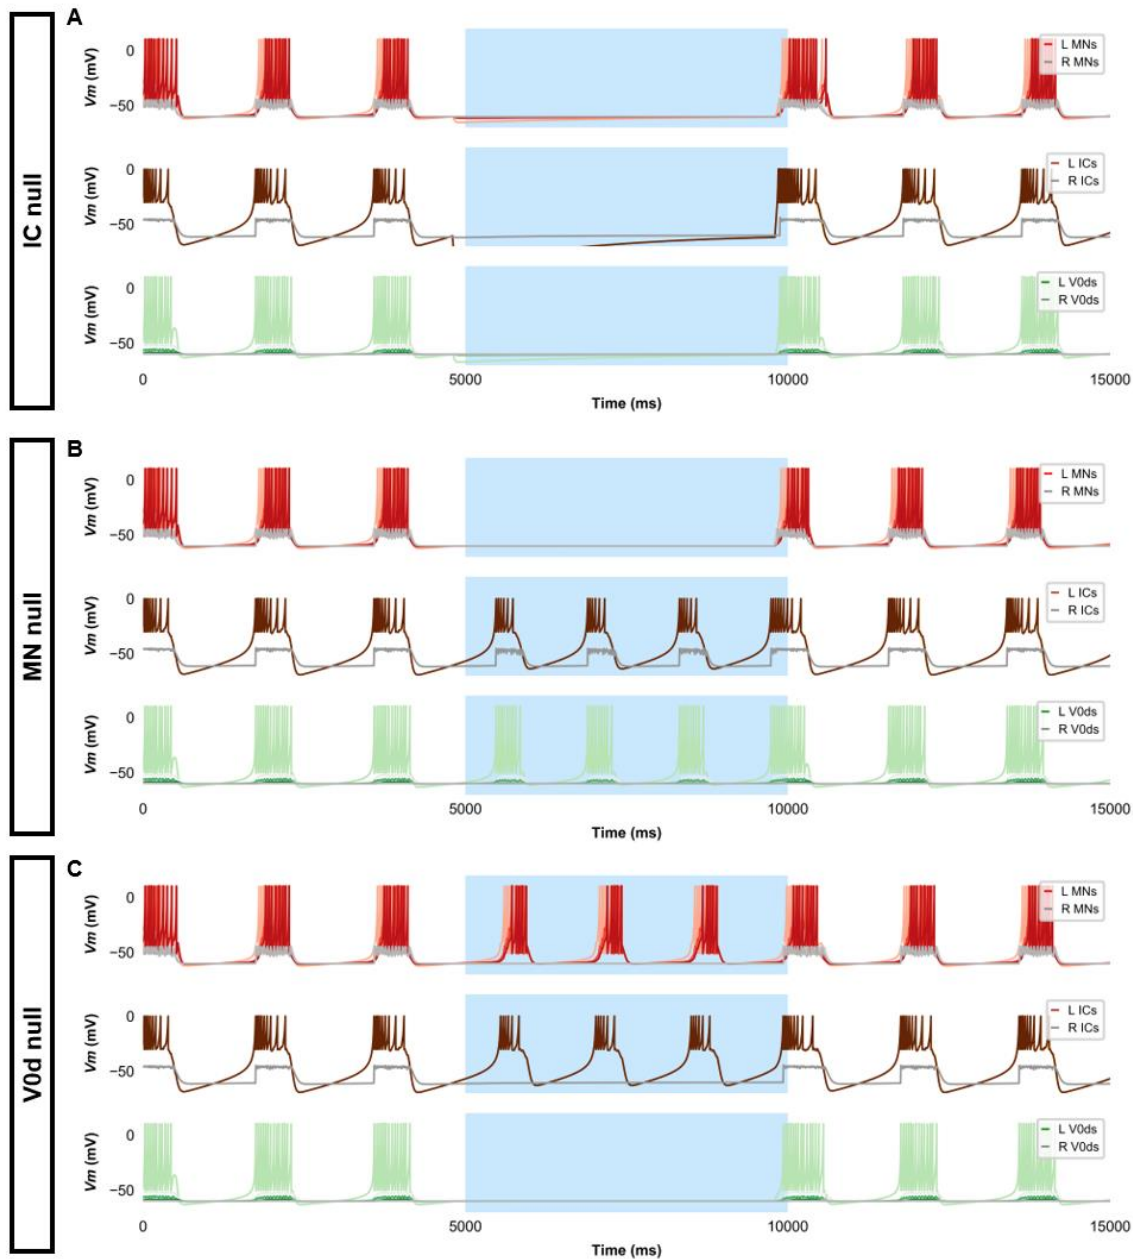

1024

1025

1026

1027

1028

1029

1030

1031

1032

1033

1034

**Figure 2 - figure supplement 1. Silencing spinal neurons during single coiling.** Simulations consisted of three 5,000 ms epochs. In the middle epoch, silencing of targeted spinal neurons was achieved by removing all synaptic and external currents from the targeted population. Synaptic and external currents were restored in the last epoch. (A) Silencing IC neurons silences the other spinal neurons. (B) Silencing MNs slightly reduces IC burst duration but does not preclude IC bursting. (C) Silencing V0ds blocks synaptic bursts in contralateral ICs and MNs but does not preclude single coils, nor does it lead to multiple coils. The  $V_m$  of a rostral (lightest), middle, and caudal (darkest) neuron is shown, except for IC neurons that are all in a rostral kernel. L: left, R: right.

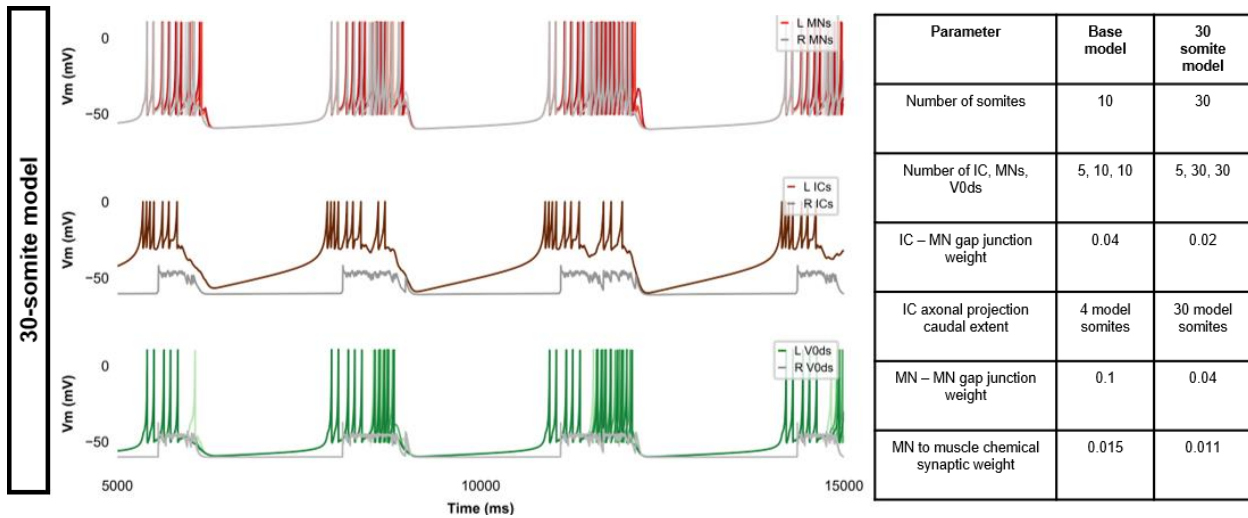

1035  
 1036 **Figure 2 - figure supplement 2. Membrane potential ( $V_m$ ) during a simulation of a 30-**  
 1037 **somite single-coiling model.** The  $V_m$  of a rostral (lightest), middle, and caudal (darkest) neuron  
 1038 is shown, except for IC neurons that are all in a rostral kernel. L: left, R: right.

1039  
 1040  
 1041  
 1042  
 1043  
 1044  
 1045  
 1046  
 1047

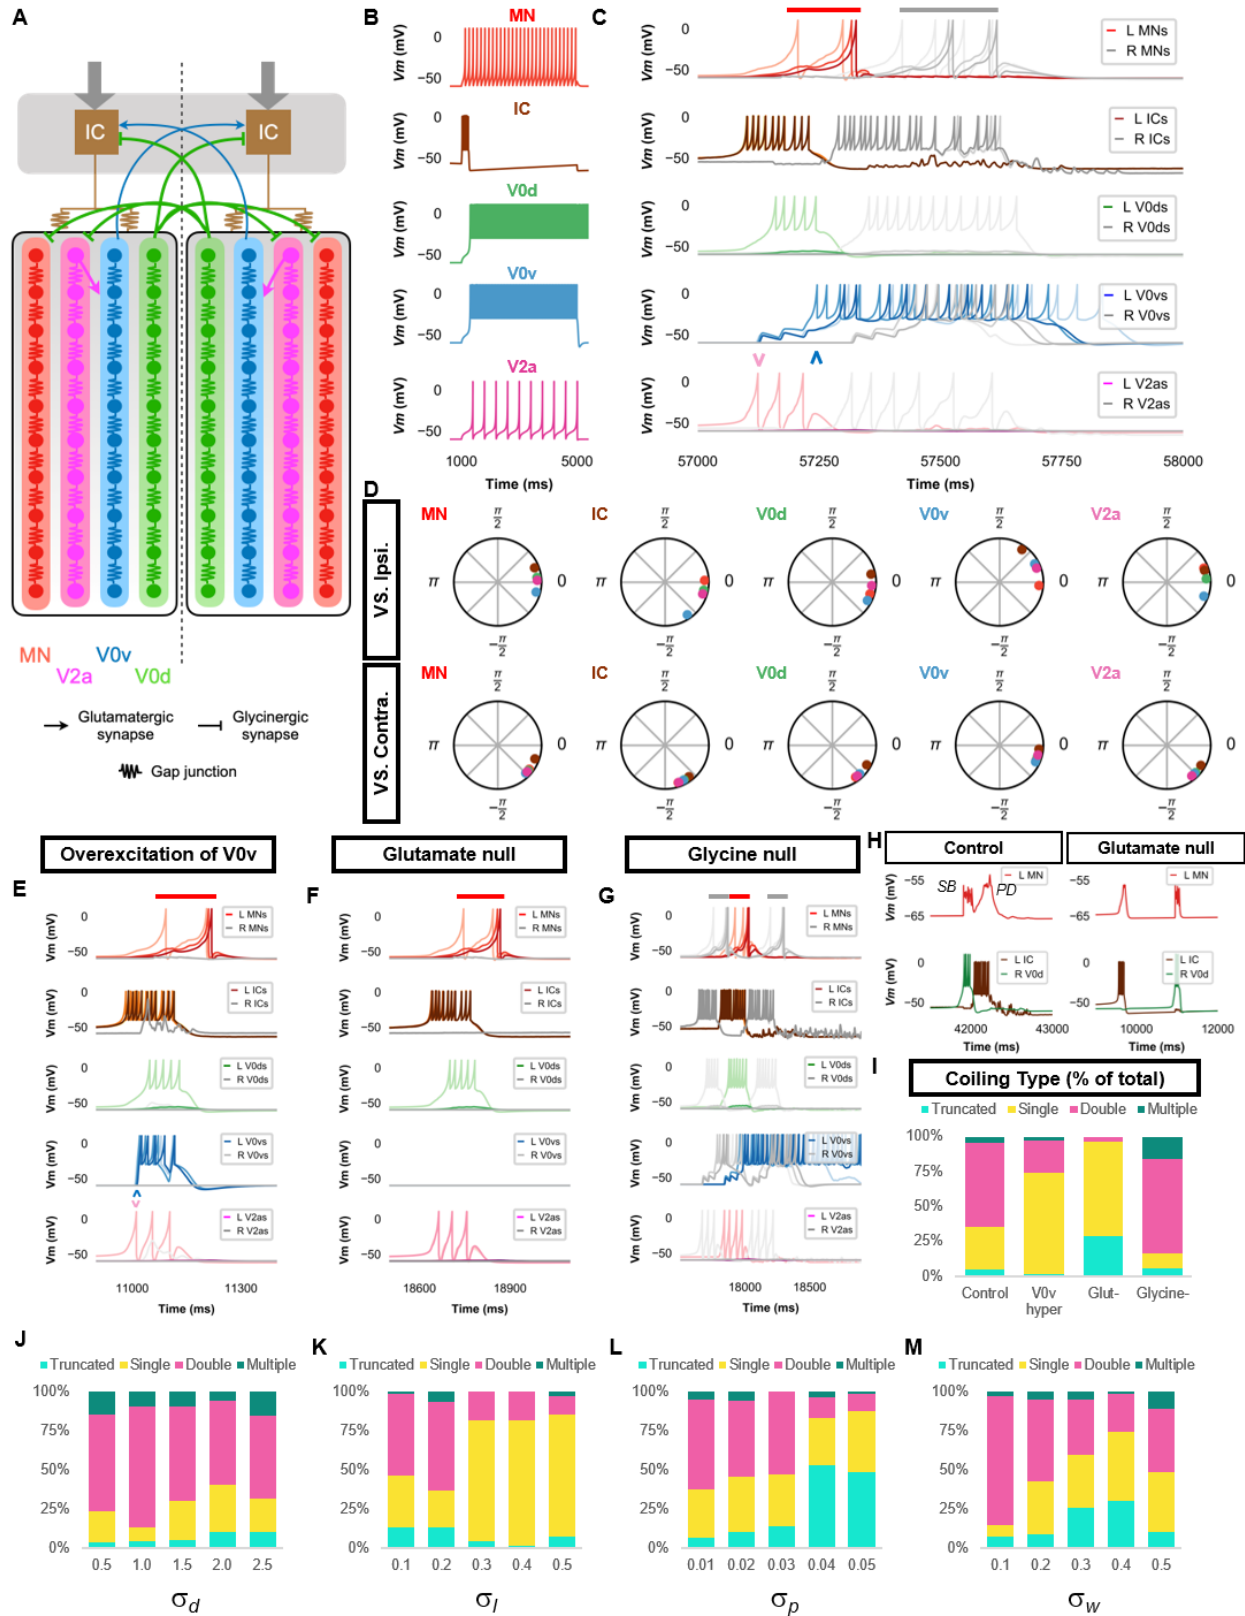

1048  
1049  
1050

**Figure 3. Double coiling model relies on a hybrid network of electrical and chemical synapses.** (A) Schematic of the double coiling model. Gap junctions between spinal neurons are

1051 not depicted. Dashed line indicates the body midline. Gray arrows indicate descending motor  
1052 command. **(B)** Membrane potential ( $V_m$ ) response of isolated spinal neuron models to a  
1053 depolarizing current step. **(C)**  $V_m$  of spinal neurons during a double coil. **(D)** The phase delay of  
1054 left neurons in relation to ipsilateral and contralateral spinal neurons in the 5<sup>th</sup> somite and an IC  
1055 in the rostral kernel during five consecutive left-right double coils. The reference neuron for each  
1056 polar plot is labelled, and all neurons follow the same color-coding as the rest of the figure. A  
1057 negative phase delay indicates that the reference neuron precedes the neuron to which it is  
1058 compared. A phase of 0 indicates that a pair of neurons is in-phase; a phase of  $\pi$  indicates that a  
1059 pair of neurons is out-of-phase.  $V_m$  in simulations where **(E)** the weights of the V2a to V0v and  
1060 the V0v to IC synapses were increased to show that early excitation of V0v prevented the  
1061 initiation of a second coil following a single coil, **(F)** all glutamatergic transmission was blocked,  
1062 and **(G)** glycinergic transmission was blocked. **(H)** *Top row*, mixed event composed of a  
1063 synaptic burst (*SB*) directly followed by a periodic depolarization (*PD*) in a motoneuron in  
1064 control but not in glutamate null conditions. *Bottom row*,  $V_m$  in left IC and right V0d during  
1065 events in top row. **(I)** Proportions of single, double, multiple, and truncated coiling events under  
1066 control, glutamate null ( $\text{Glut}^-$ ), overexcited V0vs (V0v hyper), and glycine null ( $\text{Glycine}^-$ )  
1067 conditions. Each condition was tested with five 100,000 ms runs with  $\sigma_d = 0.5$ ,  $\sigma_p = 0.01$ , and  
1068  $\sigma_w = 0.05$ . **(J-M)** Sensitivity testing showing proportions of single, double, multiple and  
1069 truncated coiling events during ten 100,000 ms runs for each value of  $\sigma_d$ ,  $\sigma_l$ ,  $\sigma_p$ , and  $\sigma_w$  tested.  
1070 Solid red and gray bars in **C,E-G** indicate the duration of coils. Chevrons in **(C)** and **(E)** denote  
1071 the initial spiking of V0vs and V2as to indicate latency of V0v firing during the first coil. For  
1072 **C,E-G**, the  $V_m$  of a rostral (lightest), middle, and caudal (darkest) neuron is shown, except for IC  
1073 neurons that are all in a rostral kernel. L: left, R: right.

1074 See also **Figure 3 - figure supplement 1** and **2** and **Figure 3 - video 1-4**.

1075

1076

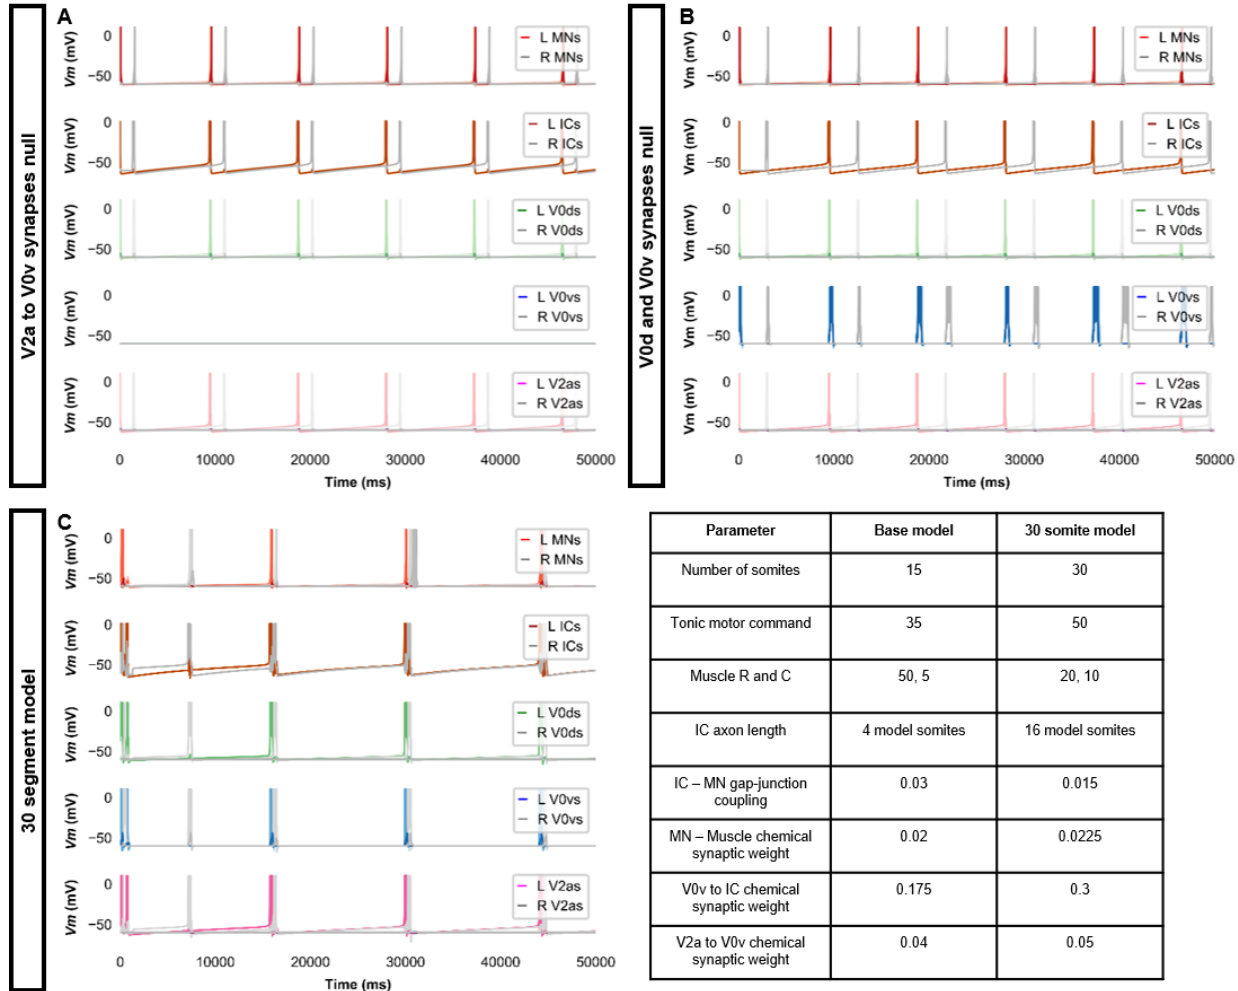

1077  
1078  
1079  
1080  
1081  
1082  
1083  
1084  
1085  
1086  
1087  
1088

**Figure 3 – figure supplement 1. Double coiling model with no V2a to V0v synapses, no contralateral synapses, or with 30 somites.**

(A) Membrane potential ( $V_m$ ) during a simulation without V2a to V0v synapses. V0v neurons remain inactive, and there are only single coils. (B) Simulation with no contralateral inhibition or excitation. The lack of double and multiple coils, even without contralateral inhibition, suggests that contralateral excitation is necessary to generate double and multiple coils. (C) Double coiling in a model composed of 30 somites. The  $V_m$  of a rostral (lightest), middle, and caudal (darkest) neuron is shown, except for IC neurons that are all in a rostral kernel. L: left, R: right. See also **Figure 3 - video 5**.

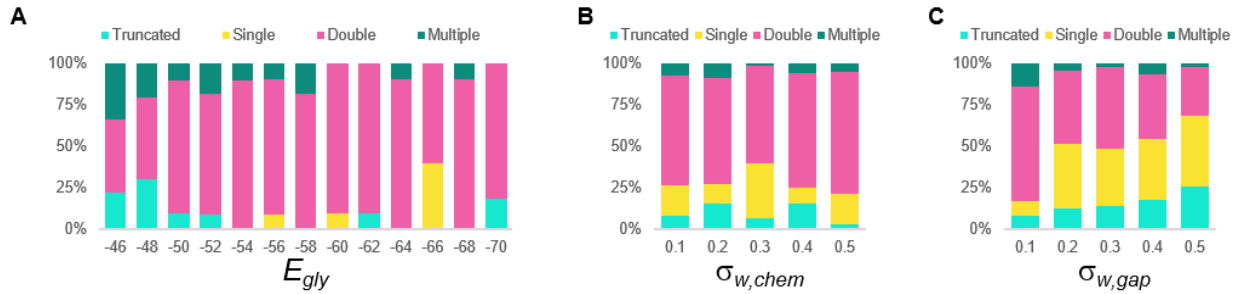

1089

1090

1091

1092

1093

**Figure 3 – figure supplement 2. Sensitivity testing of the double coiling model for the glycinergic reversal potential ( $E_{gly}$ ), weights of chemical synapses ( $\sigma_{w,chem}$ ), and weights of gap junctions ( $\sigma_{w,gap}$ ). Sensitivity testing showing proportions of single, double, multiple, and truncated coiling events during ten 100,000 ms runs for each value tested.**

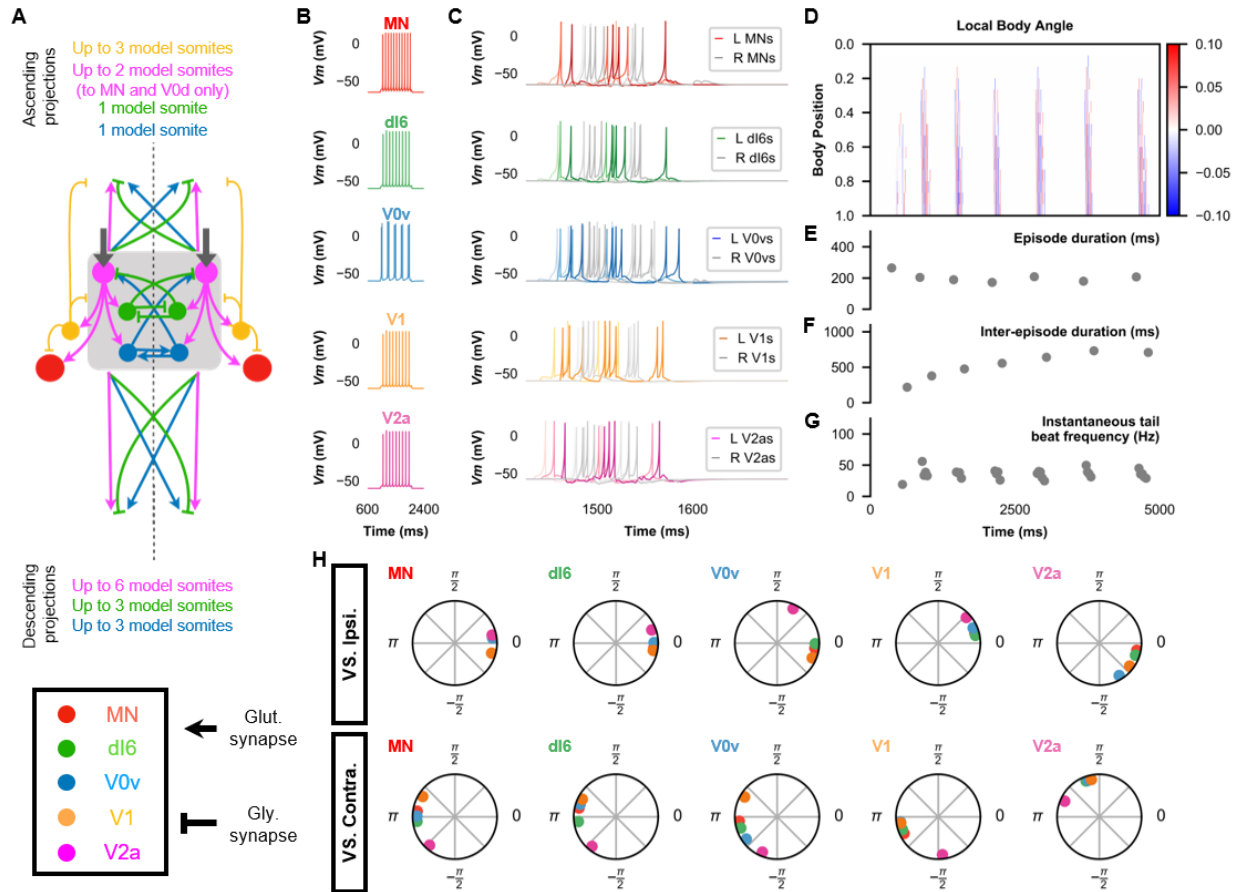

1094  
 1095 **Figure 4. The base model for beat-and-glide swimming.** (A) Schematic of the model  
 1096 architecture underlying beat-and-glide swimming. (B) Membrane potential ( $V_m$ ) response to a  
 1097 depolarizing current step of isolated spinal neurons in the model. (C)  $V_m$  of spinal neurons  
 1098 during a beat-and-glide swimming simulation. The  $V_m$  of a rostral (lightest), middle, and caudal  
 1099 (darkest) neuron is shown. L: left, R: right. (D) Heat-map of local body angle. (E) Episode  
 1100 duration, (F) inter-episode interval, (G) instantaneous tail beat frequency, and (H) the phase  
 1101 delay of left neurons in relation to ipsilateral and contralateral spinal neurons in the 10<sup>th</sup> somite  
 1102 during a 10,000 ms simulation. The reference neuron for each polar plot is labelled, and all  
 1103 neurons follow the same color-coding as the rest of the figure. A negative phase delay indicates  
 1104 that the reference neuron precedes the neuron to which it is compared. A phase of 0 indicates that  
 1105 a pair of neurons is in-phase; a phase of  $\pi$  indicates that a pair of neurons is out-of-phase.  
 1106 See also **Figure 4 - video 1**.

1107  
 1108  
 1109

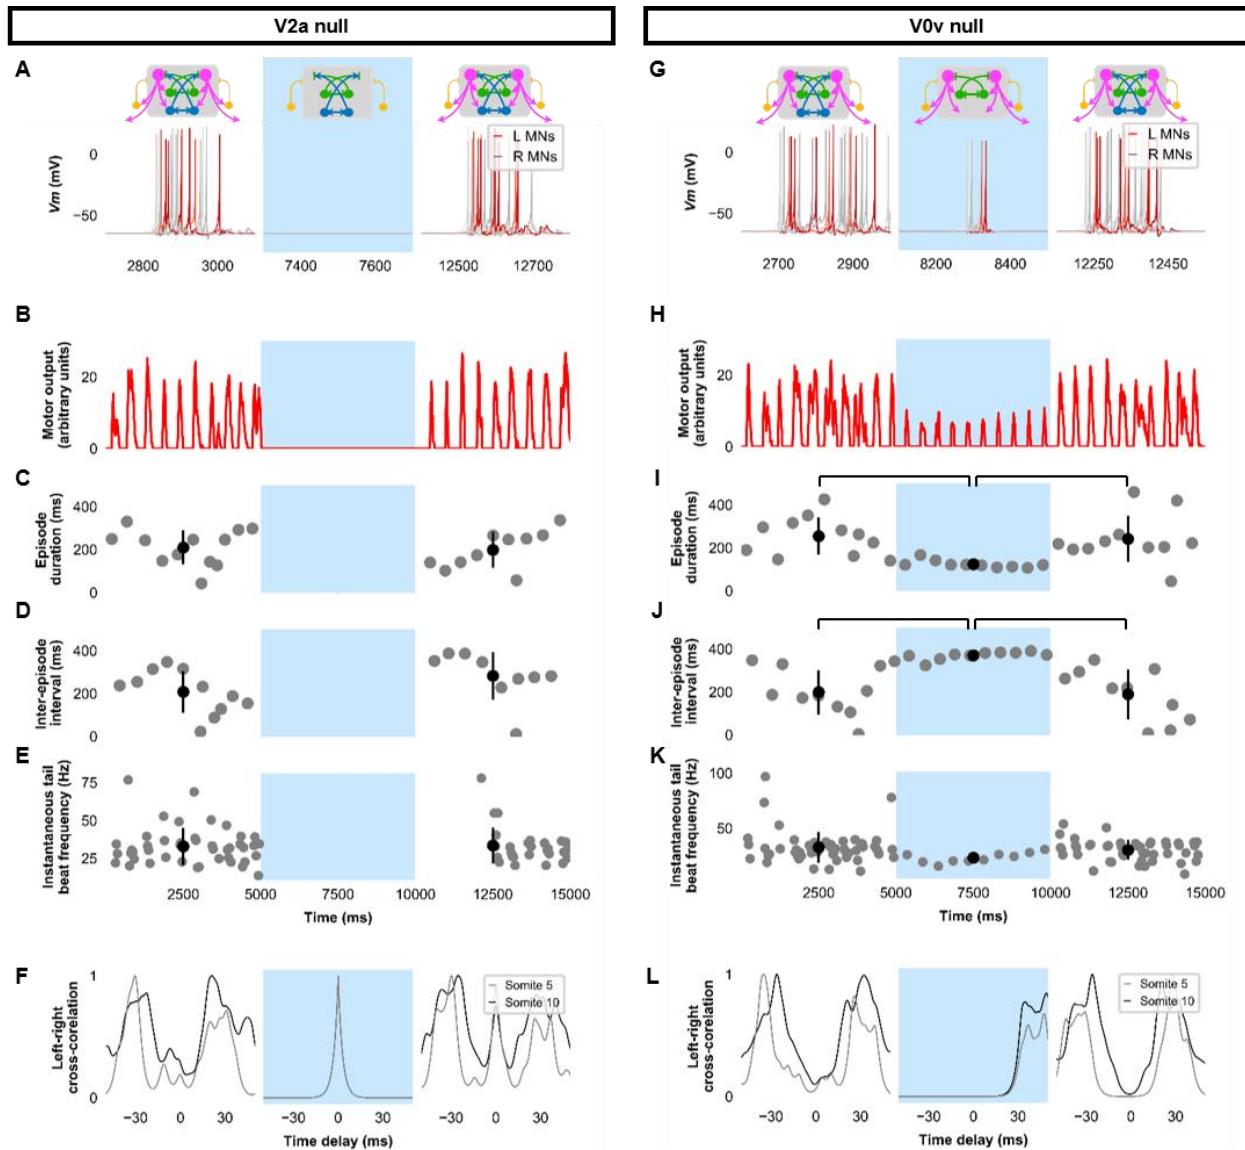

1110  
 1111 **Figure 5. Silencing spinal excitatory neurons during beat-and-glide swimming.** Simulations  
 1112 consisted of three 5,000 ms epochs. In the middle epoch, silencing of targeted spinal neurons was  
 1113 achieved by removing all synaptic and external currents from the targeted population. Synaptic  
 1114 and external currents were restored in the last epoch. (A-F) Simulations where V2as were  
 1115 silenced and (G-L), where V0vs were silenced. (A, G) *Top*, the functional state of the spinal  
 1116 network during the three epochs. *Bottom*, Motoneuron (MN) membrane potential ( $V_m$ ) during  
 1117 simulations where targeted neurons were silenced in the middle epoch. The  $V_m$  of a rostral  
 1118 (lightest), middle, and caudal (darkest) neuron is shown. (B, H) The integrated muscle output,  
 1119 (C, I) episode duration, (D, J) inter-episode intervals, and (E, K) instantaneous tail beat  
 1120 frequency during each respective simulation. Averages within epoch are shown in black (mean  $\pm$   
 1121 s.d.). Brackets denote significant pairwise differences. (F, L) the left-right coordination of  
 1122 somites 5 and 10. L: left, R: right. The first part of epoch 3 of the V2a silenced simulation  
 1123 involved synchronous left-right activity, hence the lack of instantaneous tail beat frequency



1124 values. **Statistics:** For (C-E), there were no episodes during epoch 2. There were no statistically  
1125 significant differences between epoch 1 and 3 for any of the parameters. (I)  $F_{2,31} = 7.2$ ,  $p =$   
1126  $0.0029$ . (J)  $F_{2,28} = 10.2$ ,  $p = 0.001$ . (K)  $F_{2,115} = 3.0$ ,  $p = 0.055$ . P-values for t-tests are found in  
1127 **Figure 5 - supplementary table 1.**

1128 See also **Figure 5 - figure supplement 1** and **Figure 5 - video 1** and **2.**

1129

1130

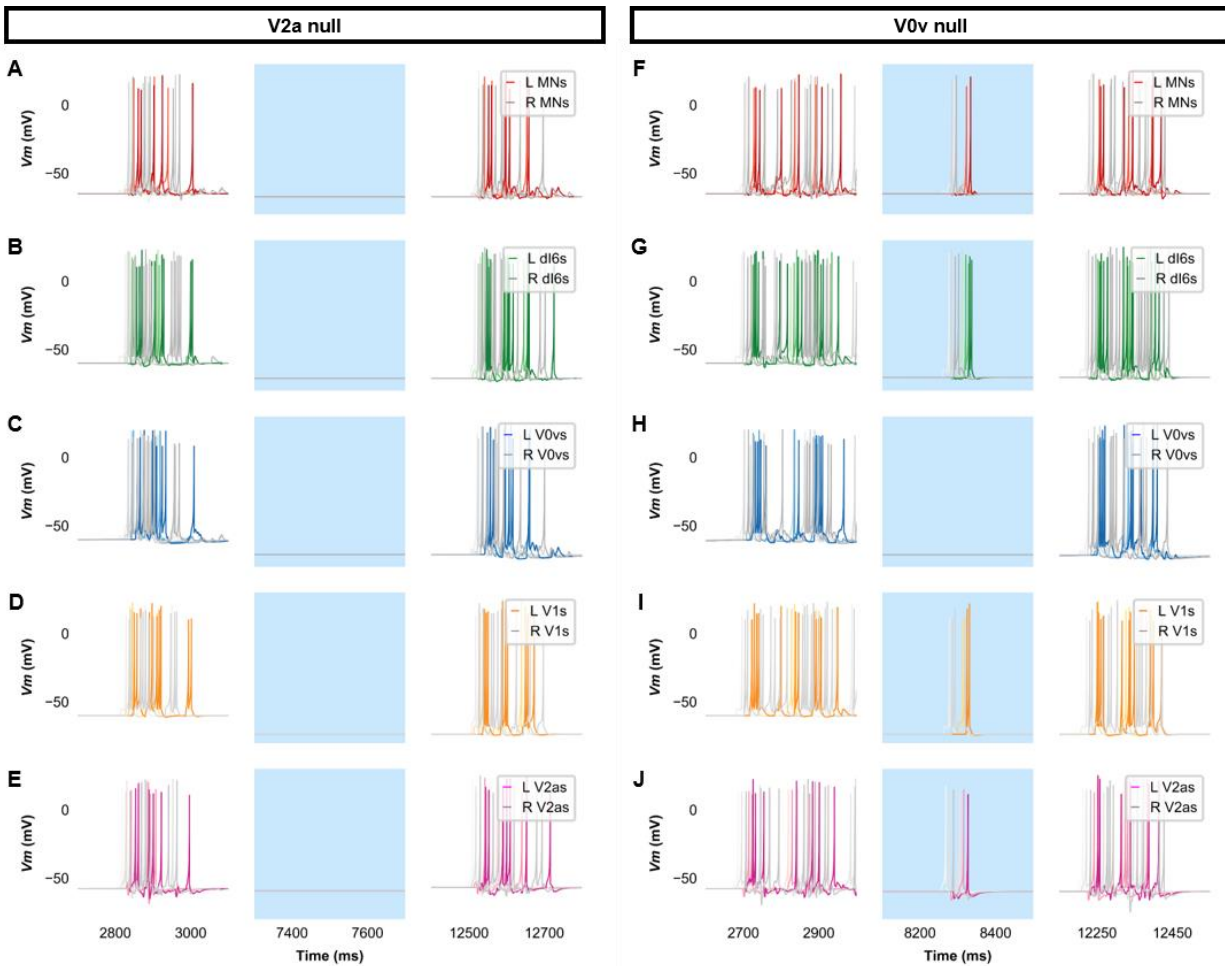

1131  
1132 **Figure 5 - figure supplement 1. Membrane potential ( $V_m$ ) of spinal neurons during**  
1133 **simulations of beat-and-glide swimming where excitatory neurons were silenced.**  
1134 Simulations consisted of three 5,000 ms epochs. In the middle epoch, silencing of targeted spinal  
1135 neurons was achieved by removing all synaptic and external currents from the targeted  
1136 population. Synaptic and external currents were restored in the last epoch. (A-E) Simulations  
1137 where V2as were silenced and (F-J), where V0vs were silenced in the middle epoch. The  $V_m$  of  
1138 a rostral (lightest), middle, and caudal (darkest) neuron is shown. L: left, R: right.  
1139

1140

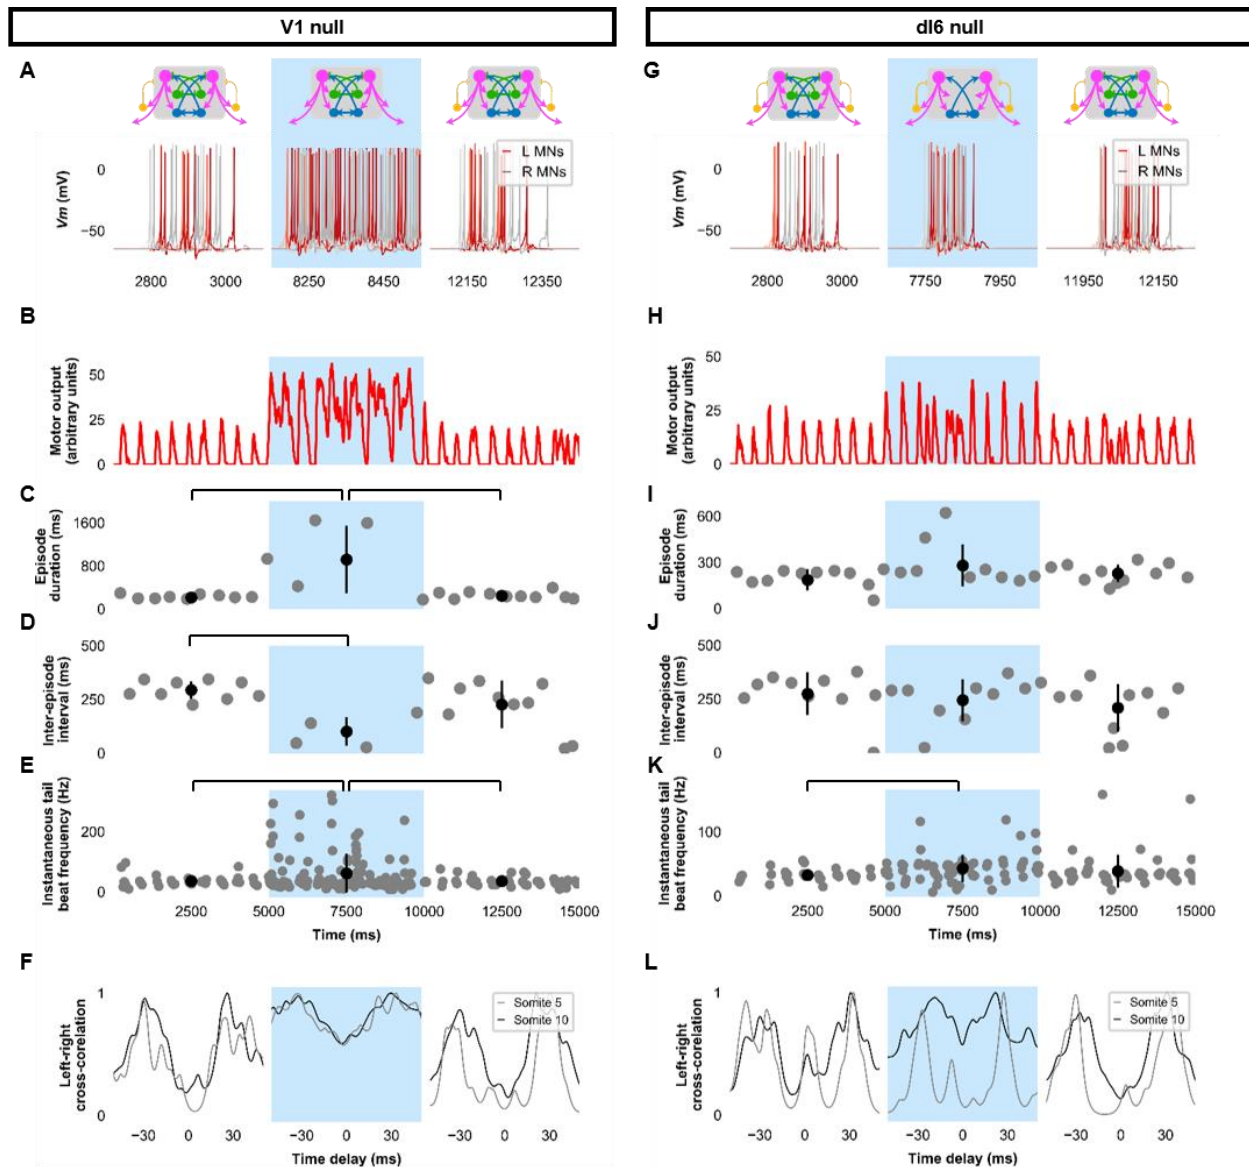

1141  
 1142 **Figure 6. Silencing spinal inhibitory neurons during beat-and-glide swimming.** Simulations  
 1143 consisted of three 5,000 ms epochs. In the middle epoch, silencing of targeted spinal neurons was  
 1144 achieved by removing all synaptic and external currents from the targeted population. Synaptic  
 1145 and external currents were restored in the last epoch. (A-F) Simulations where V1s were silenced  
 1146 and (G-L), where dl6s were silenced. (A, G) *Top*, the functional state of the spinal network  
 1147 during the three epochs. *Bottom*, Motoneuron (MN) membrane potential ( $V_m$ ) during simulations  
 1148 where targeted neurons were silenced in the middle epoch. The  $V_m$  of a rostral (lightest), middle,  
 1149 and caudal (darkest) neuron is shown. (B, H) The integrated muscle output, (C, I) episode  
 1150 duration, (D, J) inter-episode intervals, and (E, K) instantaneous tail beat frequency during each  
 1151 respective simulation. Averages within epoch are shown in black (mean  $\pm$  s.d.). Brackets denote  
 1152 significant pairwise differences. (F, L) the left-right coordination of somites 5 and 10. L: left, R:  
 1153 right. **Statistics:** (C)  $F_{2,25} = 10.5$ ,  $p = 5.8 \times 10^{-4}$ . (D)  $F_{2,22} = 6.6$ ,  $p = 0.0063$ . (E)  $F_{2,214} = 6.9$ ,  $p =$

1154 0.0013. **(I)**  $F_{2,31} = 2.5$   $p = 0.10$ . **(J)**  $F_{2,28} = 0.9$ ,  $p = 0.42$ . **(K)**  $F_{2,145} = 3.5$ ,  $p = 0.033$ . P-values for  
1155 t-tests are found in **Figure 6 - supplementary table 1**.  
1156 See also **Figure 6 - figure supplement 1** and **2** and **Figure 6 - video 1** and **2**.  
1157

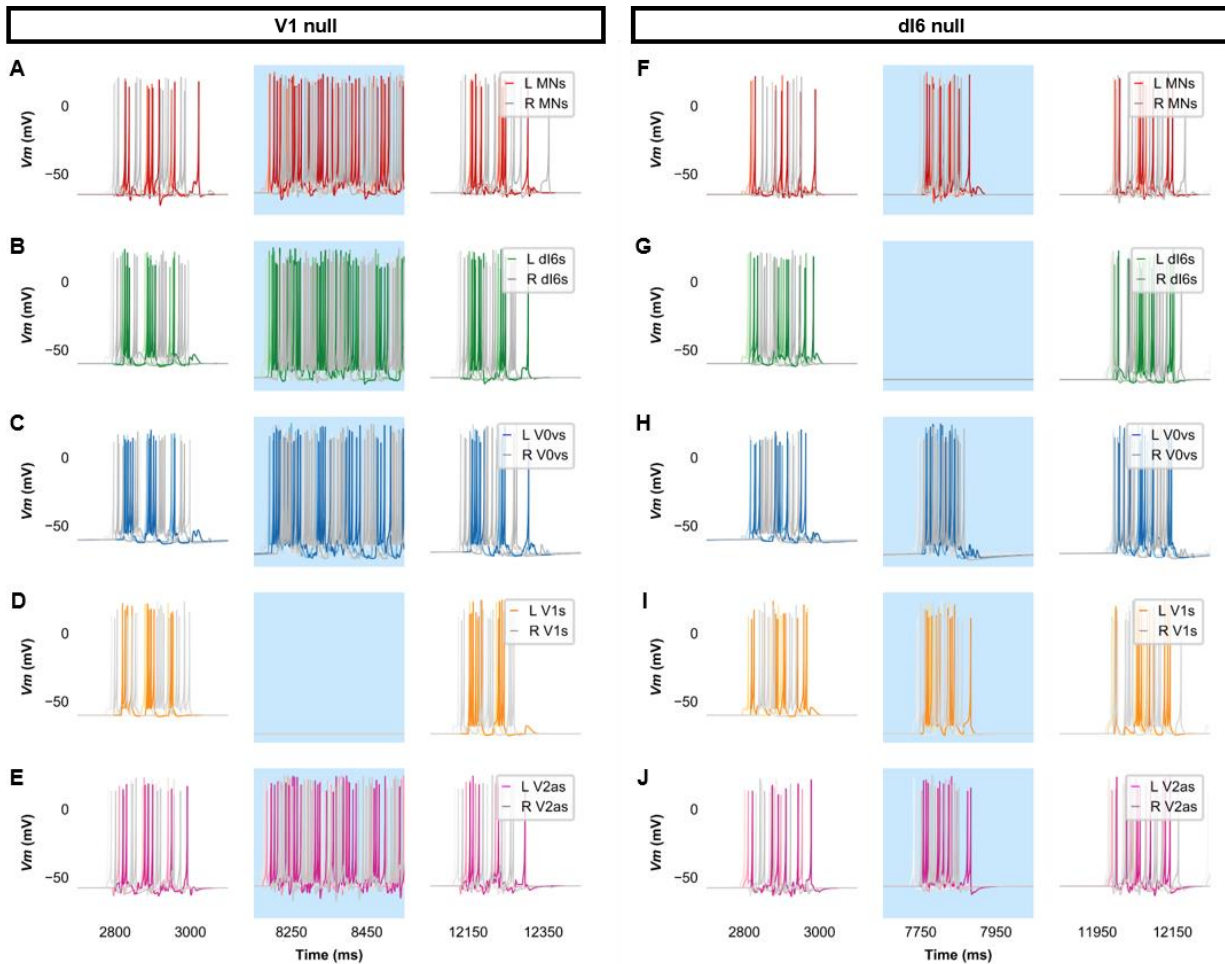

1158

1159 **Figure 6 - figure supplement 1. Membrane potential ( $V_m$ ) of spinal neurons during**  
 1160 **simulations of beat-and-glide swimming where inhibitory neurons were silenced.**

1161 Simulations consisted of three 5,000 ms epochs. In the middle epoch, silencing of targeted spinal  
 1162 neurons was achieved by removing all synaptic and external currents from the targeted  
 1163 population. Synaptic and external currents were restored in the last epoch. (A-E) Simulations  
 1164 where V1s were silenced and (F-J), where dl6s were silenced in the middle epoch. The  $V_m$  of a  
 1165 rostral (lightest), middle, and caudal (darkest) neuron is shown. L: left, R: right.

1166

1167

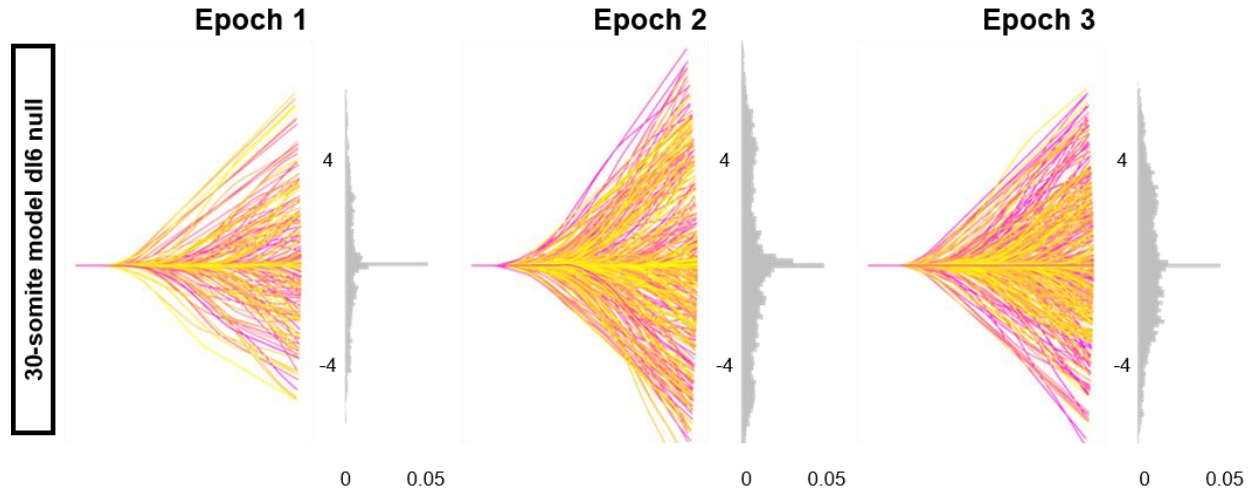

1168

1169 **Figure 6 - figure supplement 2. Altered kinematics during silencing of dI6 neurons.**

1170 Simulation of a 30-somite beat-and-glide swimming model consisted of three 5,000 ms epochs.

1171 In the middle epoch, silencing of dI6s was achieved by removing all synaptic and external

1172 currents from the targeted population. Synaptic and external currents were restored in the last

1173 epoch. Representative body midlines are shown for each epoch along with a probability density

1174 histogram of the y-coordinate of the terminal somite during each epoch. The histograms are

1175 truncated at 0.05 as there were many points at  $y = 0$  during inter-episode intervals. The magenta

1176 to yellow color coding represents the progression through each epoch. Details of the 30-somite

1177 model are described in **Figure 8 - figure supplement 1**

1178

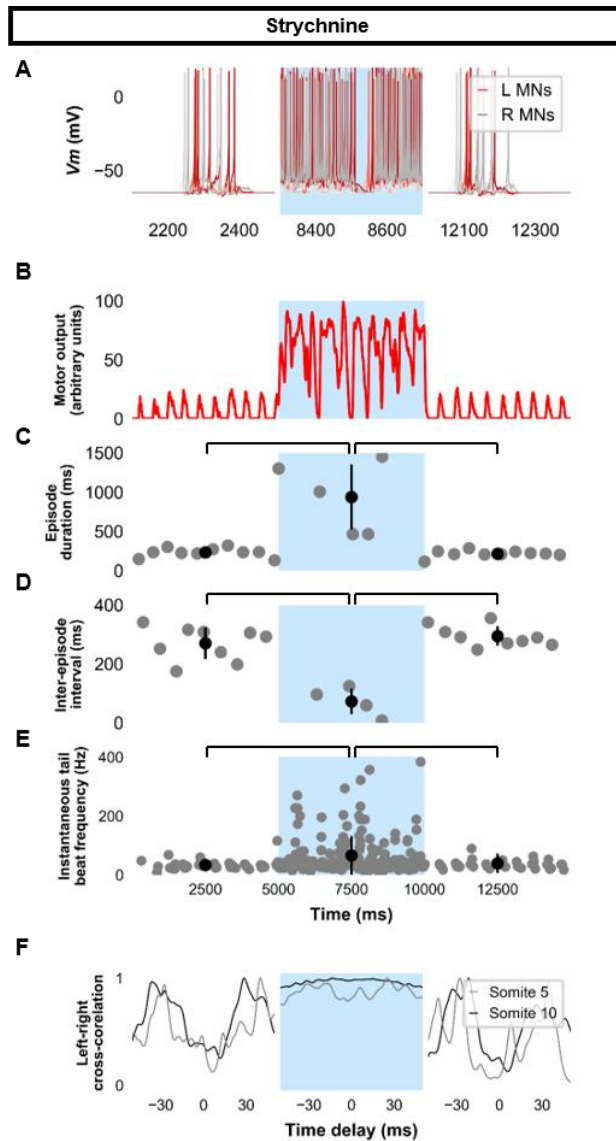

1179  
 1180 **Figure 7. Simulating the effects of strychnine on beat-and-glide swimming.** Simulations to  
 1181 assess the effects of blocking glycinergic transmission consisted of three 5,000 ms epochs. In the  
 1182 middle epoch, all glycinergic currents were blocked. Glycinergic transmission was restored in the  
 1183 last epoch. **(A)** Motoneuron (MN) membrane potential ( $V_m$ ) during simulations where glycinergic  
 1184 transmission was blocked in the middle epoch. The  $V_m$  of a rostral (lightest), middle, and caudal  
 1185 (darkest) neuron is shown. **(B)** The integrated muscle output, **(C)** episode duration, **(D)** inter-  
 1186 episode intervals, and **(E)** instantaneous tail beat frequency during this simulation. Averages  
 1187 within epoch are shown in black (mean  $\pm$  s.d.). **(F)** The left-right coordination of somites 5 and 10.  
 1188 L: left, R: right. **Statistics:** **(C)**  $F_{2,24} = 2.5$ ,  $p = 2.2 \times 10^{-6}$ . **(D)**  $F_{2,21} = 32.0$ ,  $p = 8.3 \times 10^{-7}$ . **(E)**  $F_{2,267}$   
 1189  $= 8.3$ ,  $p = 0.0003$ . P-values for t-tests are found in **Figure 7 - supplementary table 1**. See also  
 1190 also **Figure 7 - figure supplement 1** and **Figure 7 - video 1**

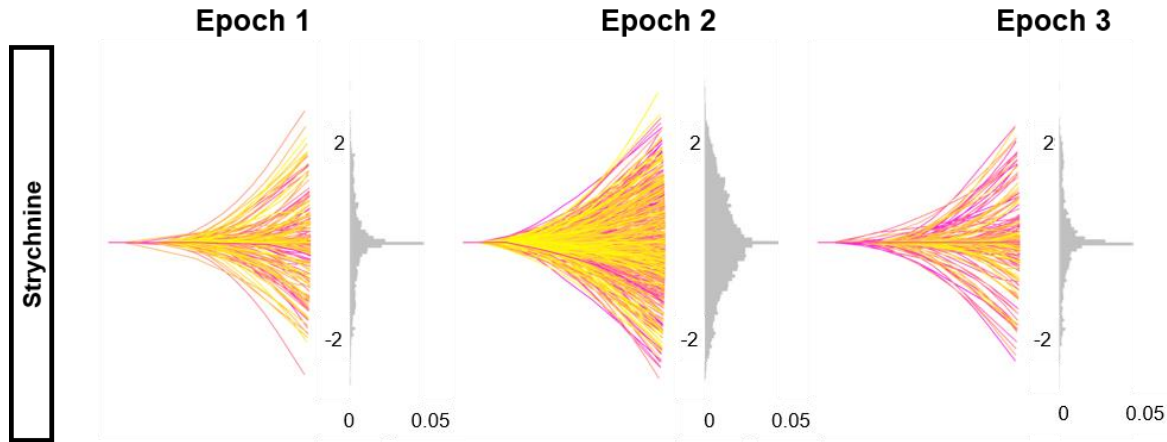

1191  
1192 **Figure 7 - figure supplement 1. Altered kinematics during strychnine.** Simulation of the base  
1193 beat-and-glide swimming model consisted of three 5,000 ms epochs. In the middle epoch, all  
1194 glycinergic currents were blocked. Glycinergic transmission was restored in the last epoch.  
1195 Representative body midlines are shown for each epoch along with a probability density  
1196 histogram of the y-coordinate of the terminal somite during each epoch. The histograms are  
1197 truncated at 0.05 as there were many points at  $y = 0$  during inter-episode intervals. The magenta  
1198 to yellow color coding represents the progression through each epoch.  
1199



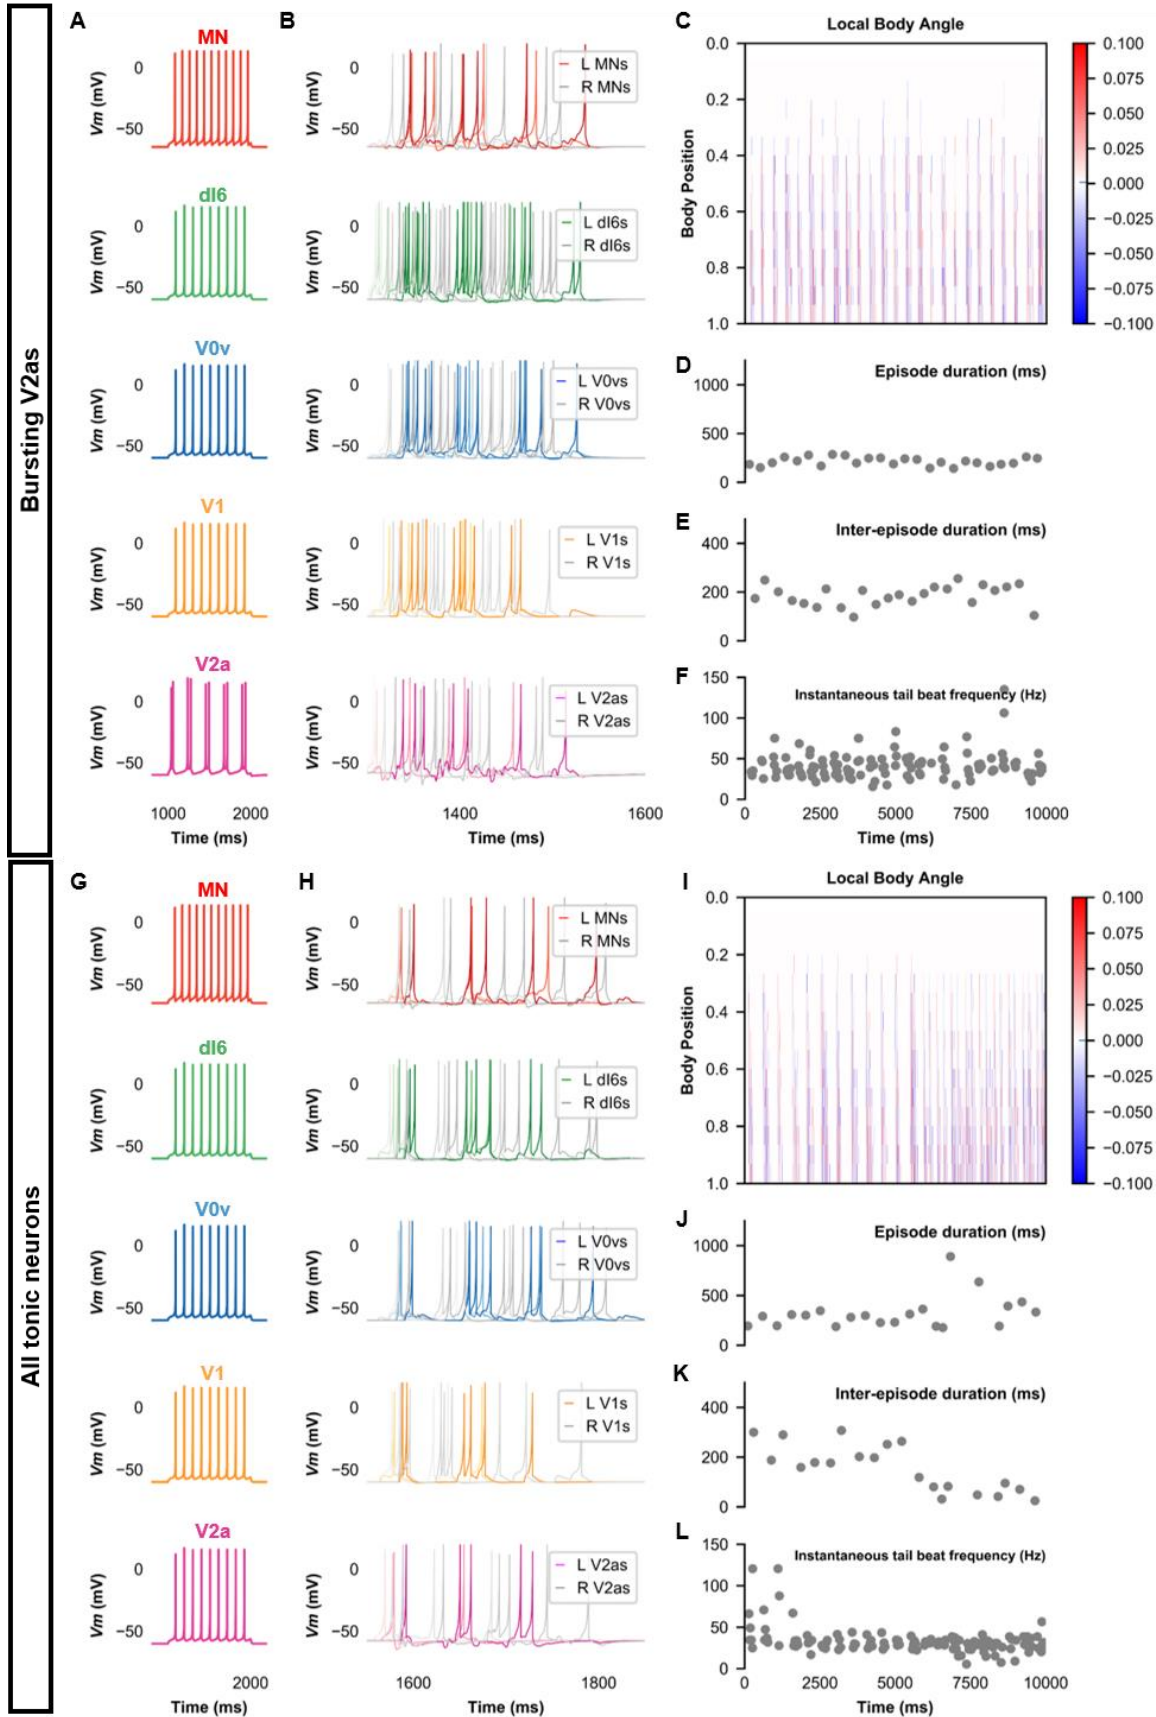

1201 **Figure 8. Beat-and-glide models with bursting V2a (A-F) or only tonic neurons (G-L). (A, G)**  
1202 Membrane potential ( $V_m$ ) response of isolated neurons in the model to a current step. **(B, H)**  $V_m$   
1203 of spinal neurons during swimming simulation. The membrane potential of a rostral (lightest),  
1204 middle, and caudal (darkest) neuron is shown. L: left, R: right. **(C, I)** Heat-map of local body angle.  
1205 **(D, J)** Episode duration, **(E, K)** inter-episode interval, and **(F, L)** instantaneous tail beat frequency  
1206 during the same simulations as **B** and **H**, respectively.  
1207 See also **Figure 8 - figure supplement 1** and **2**, and *video 1* and *2*.  
1208

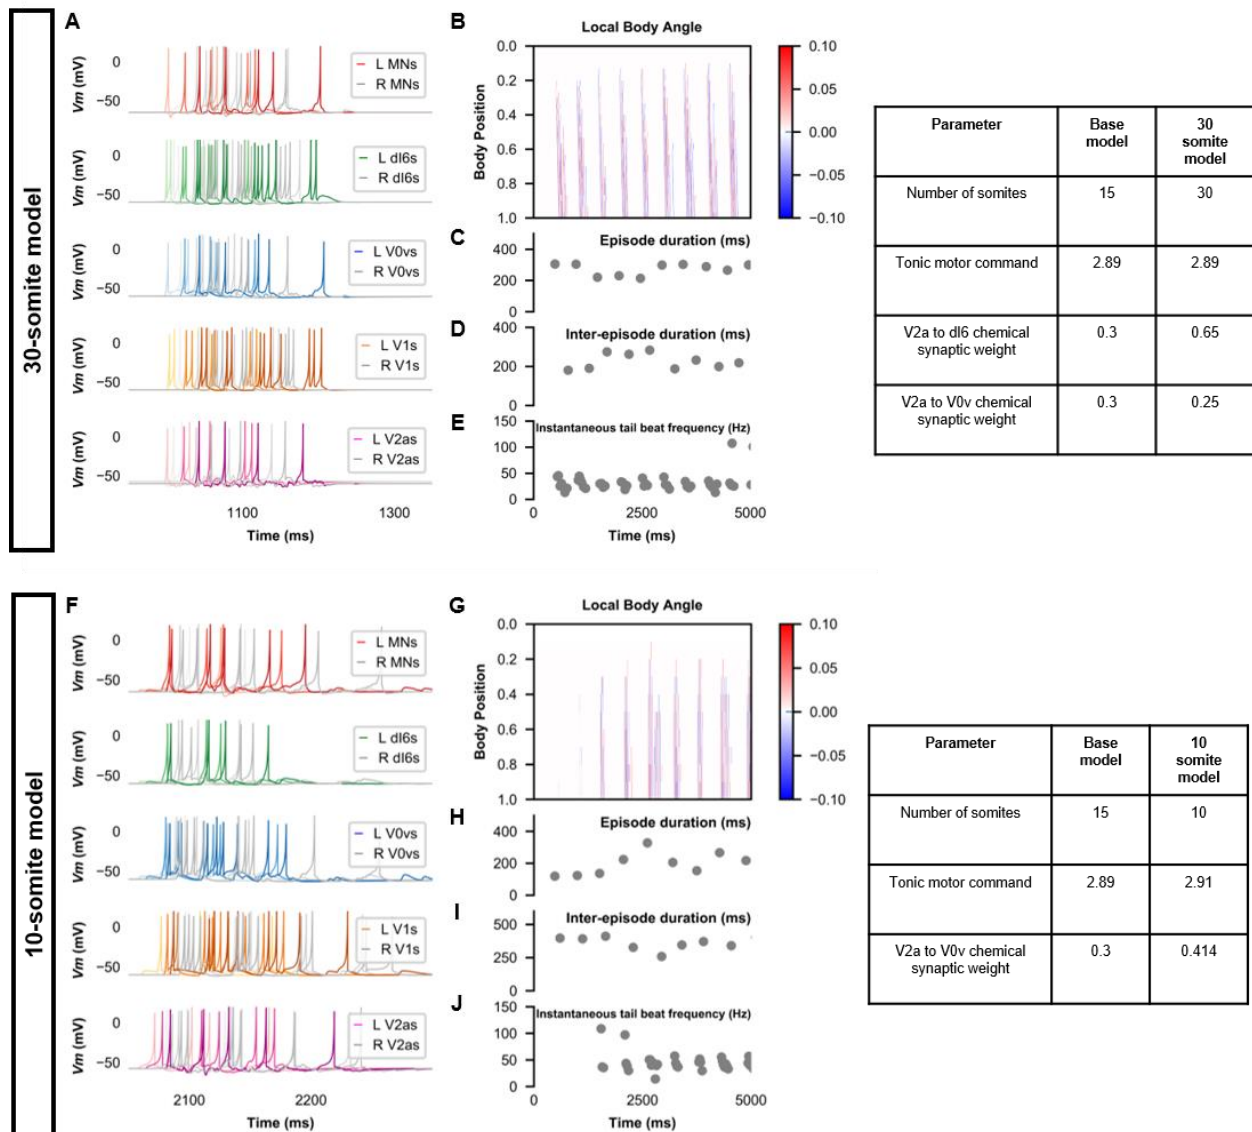

1209  
 1210 **Figure 8 - figure supplement 1. Beat-and-glide swimming model with different number of**  
 1211 **somites. (A, F) Membrane potential ( $V_m$ ) of spinal neurons during a beat-and-glide swimming**  
 1212 **simulation. The  $V_m$  of a rostral (lightest), middle, and caudal (darkest) neuron is shown. L: left, R:**  
 1213 **right. (B, G) Heat-map of local body angle, (C, H) episode duration, (D, I) inter-episode interval,**  
 1214 **and (E, J) instantaneous tail beat frequency during the same simulations as A and F, respectively.**

1215  
 1216  
 1217  
 1218  
 1219  
 1220

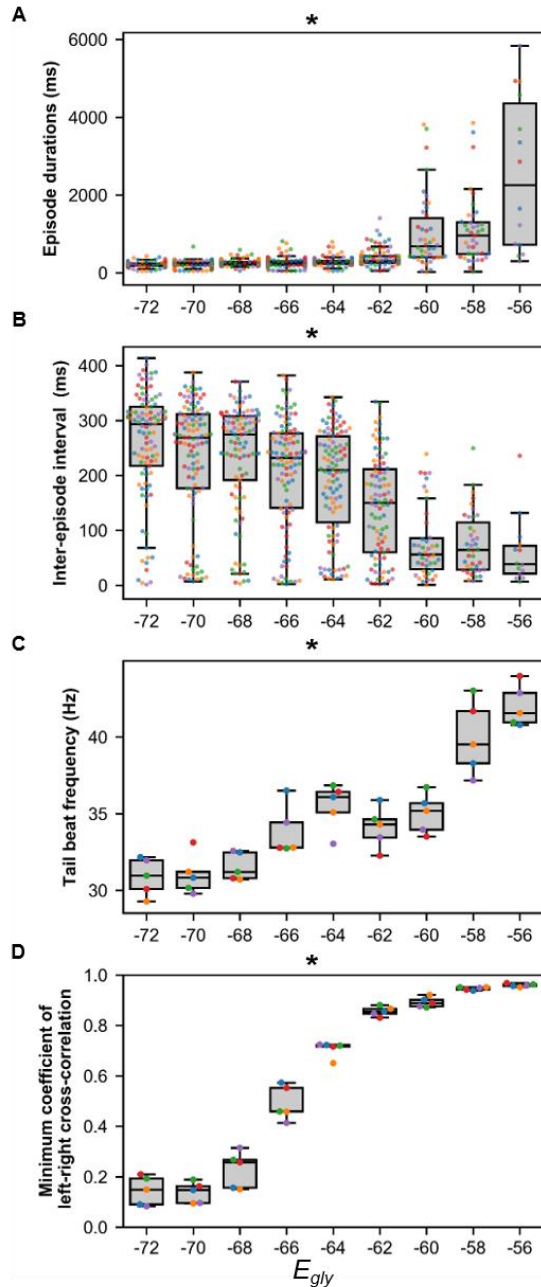

1221  
 1222 **Figure 8 - figure supplement 2. Sensitivity of beat-and-glide swimming to variability in**  
 1223 **glycinergic reversal potential ( $E_{gly}$ ).** Five 10,000-ms long simulations were run for each value of  
 1224  $E_{gly}$ . **(A)** Episode duration, **(B)** inter-episode intervals, and **(C)** average tail beat frequency during  
 1225 each swimming episode. **(D)** The minimum coefficient of the cross-correlation of left and right  
 1226 muscle was calculated at each  $E_{gly}$ . The minimum coefficient was taken between -10 and 10 ms  
 1227 time delays. Asterisks denote significant differences detected using a one-factor ANOVA test.  
 1228 Each run is color coded. **Statistics:** **(A)**  $F_{8,681} = 74.9$ ,  $p = 2.7 \times 10^{-88}$ . **(B)**  $F_{8,681} = 32.6$ ,  $p = 1.5 \times 10^{-43}$ .  
 1229 **(C)**  $F_{8,36} = 22.9$ ,  $p = 6.0 \times 10^{-12}$ . **(D)**  $F_{8,36} = 327.8$ ,  $p = 3.0 \times 10^{-31}$ . P-values for t-tests are found  
 1230 in **Figure 8 - supplementary table 1.**

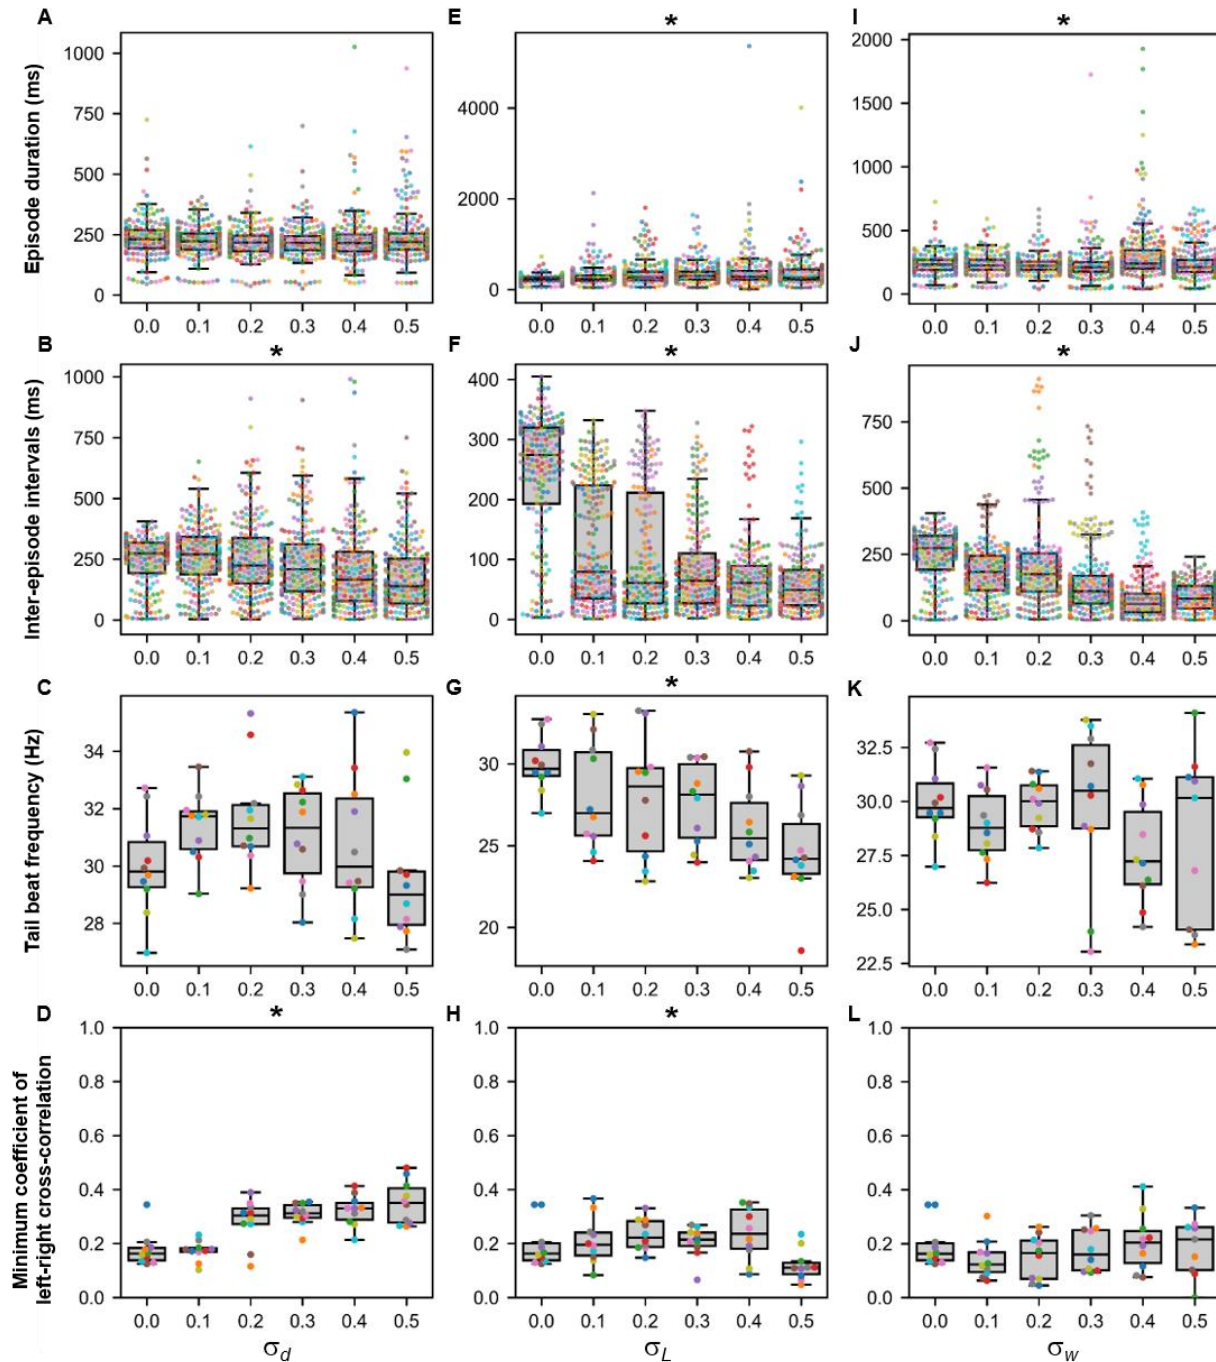

1231  
 1232 **Figure 9. Sensitivity of beat-and-glide swimming to tonic motor command amplitude, length**  
 1233 **of rostrocaudal projections, and synaptic weighting.** Ten 10,000-ms long simulations were run  
 1234 for each value of  $\sigma_d$  (A-D),  $\sigma_L$  (E-H), and  $\sigma_w$  (I-L) tested. (A, E, I) Episode duration. (B, F, J)  
 1235 Inter-episode interval. (C, G, K) Average tail beat frequency during each swimming episode. (D,  
 1236 H, L) Minimum coefficient of the cross-correlation of left and right muscle. The minimum was  
 1237 taken between -10 and 10 ms time delays. Each circle represents a single swimming episode (A,  
 1238 E, I), inter-episode interval (B, F, J), or a single run (all other panels). Each run is color coded.  
 1239 Runs with only one side showing activity are not depicted in (D) and (H). Asterisks denote

1240 significant differences detected using a one-factor ANOVA test. **Statistics:** (A)  $F_{5,1253} = 2.5$ ,  $p =$   
1241  $0.03$ . (Note that there were no pairwise differences detected). (B)  $F_{5,1253} = 11.2$ ,  $p = 1.3 \times 10^{-10}$ .  
1242 (C)  $F_{5,54} = 1.9$ ,  $p = 0.11$ . (D)  $F_{5,54} = 14.5$ ,  $p = 5.2 \times 10^{-9}$ . (E)  $F_{5,1253} = 8.7$ ,  $p = 3.8 \times 10^{-8}$ . (F)  $F_{5,1253}$   
1243  $= 118.1$ ,  $p = 2.0 \times 10^{-102}$ . (G)  $F_{5,54} = 4.0$ ,  $p = 0.004$ . (H)  $F_{5,54} = 3.2$ ,  $p = 0.014$ . (I)  $F_{5,1400} = 13.5$ ,  $p$   
1244  $= 6.8 \times 10^{-13}$ . (J)  $F_{5,1400} = 74.5$ ,  $p = 2.5 \times 10^{-69}$ . (K)  $F_{5,53} = 1.3$ ,  $p = 0.30$ . (L)  $F_{5,53} = 0.8$ ,  $p = 0.55$ .  
1245 P-values for t-tests are found in **Figure 9 - supplementary table 1**.

1246

1247

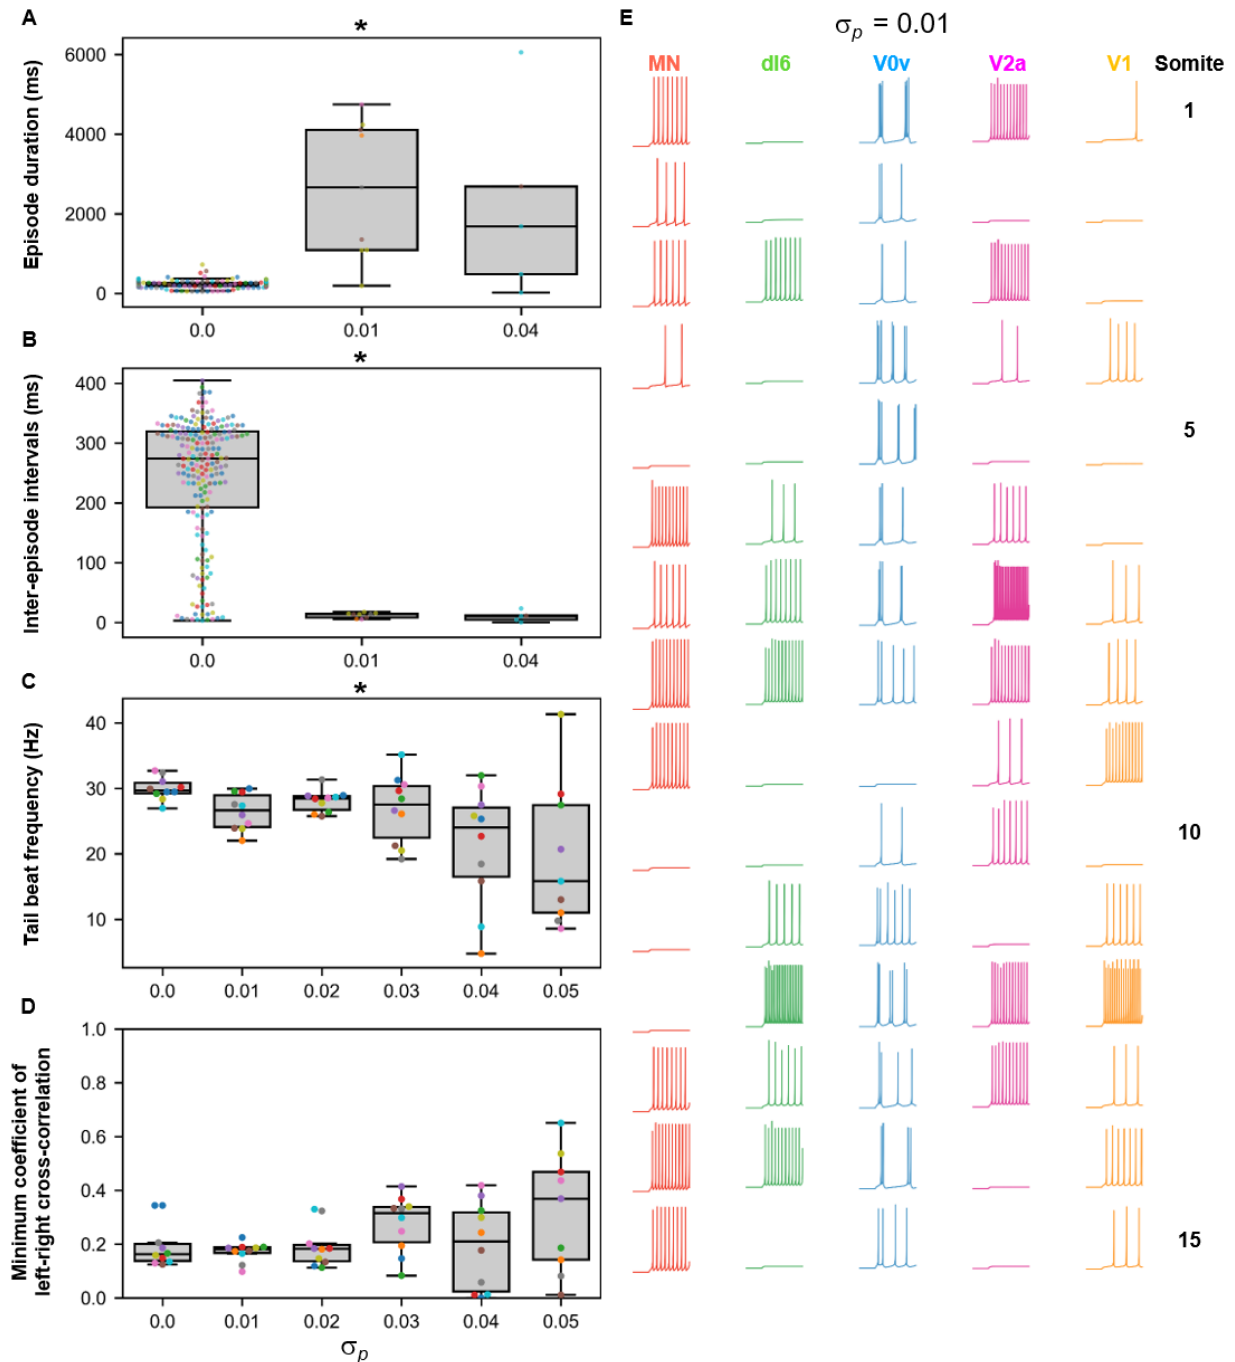

1248  
1249  
1250  
1251  
1252  
1253  
1254  
1255  
1256

**Figure 10. Sensitivity of beat-and-glide swimming to variability in membrane potential dynamics.** Ten 10,000-ms long simulations were run at each value of  $\sigma_p$  (A-D). (A) Episode duration. (B) Inter-episode interval. (C) Average tail beat frequency during each swimming episode. (D) Minimum coefficient of the cross-correlation of left and right muscle. The minimum was taken between -10 and 10 ms time delays. Each circle represents a single swimming episode (A), inter-episode interval (B) or a single run (C, D). Each run is color-coded. Runs not depicted exhibited either continual motor activity with no gliding pauses or no swimming activity. Asterisks denote significant differences detected using a one-factor ANOVA test. (E) Responses to a 1-s

1257 long step current of all neurons on the left side in a model where  $\sigma_p = 0.01$ . Step current amplitudes  
1258 varied between populations of neurons. The amplitude of the step currents to each population is  
1259 the same as in **Figure 4B**. The simulation of the model with these neurons generated continued  
1260 swimming activity with no gliding pauses. The neurons are ordered by somite, from somite 1 at  
1261 the top to somite 15 at the bottom. **Statistics:** (A)  $F_{2,211} = 143.8$ ,  $p = 4.0 \times 10^{-40}$ . (B)  $F_{2,211} = 32.3$ ,  
1262  $p = 5.8 \times 10^{-13}$ . (C)  $F_{5,53} = 4.0$ ,  $p = 0.0036$ . (D)  $F_{5,53} = 2.1$ ,  $p = 0.085$ . P-values for t-tests are found  
1263 in **Figure 10 - supplementary table 1**.  
1264  
1265  
1266



1267

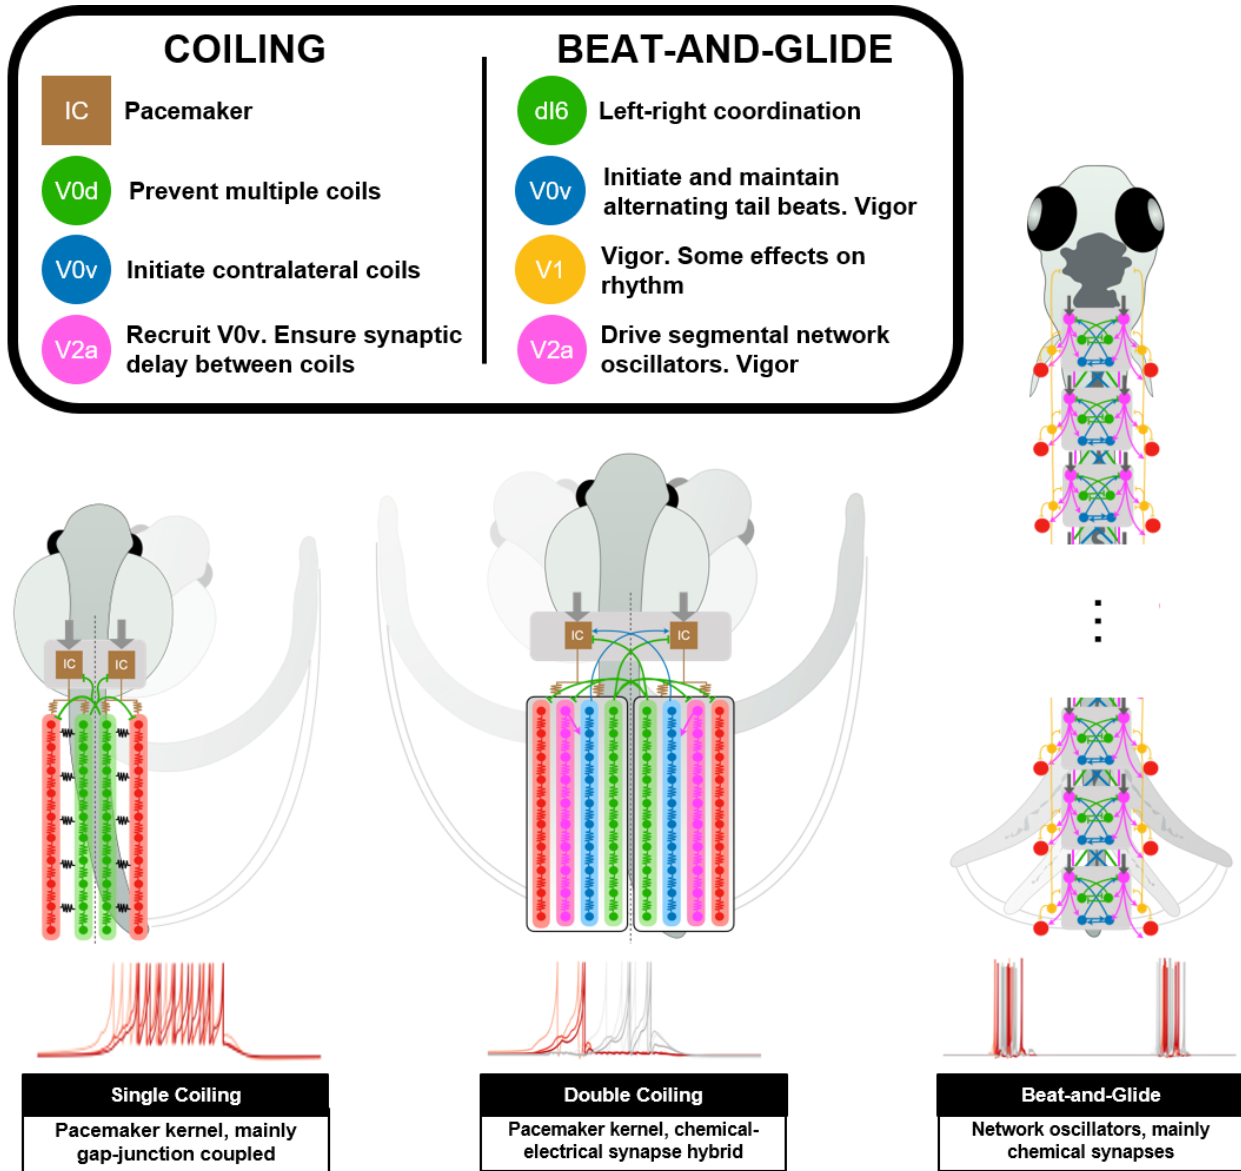

1268

1269

1270

1271

**Figure 11. Summary figure of computational models of zebrafish locomotor movements during development.**

1272

1273 **Table 1.** Comparison of beat-and-glide swimming in model and experimental data from Buss  
1274 and Drapeau (2001)

1275

| <b>Parameter</b>                 | <b>Base model</b> | <b>Buss and Drapeau (2001)</b> |
|----------------------------------|-------------------|--------------------------------|
| Mean episode duration (ms)       | 234 +/- 6         | 180 +/- 20                     |
| Mean inter-episode interval (ms) | 242 +/- 20        | 390 +/- 30                     |
| Mean tail beat frequency (Hz)    | 30.0 +/- 0.6      | 35 +/- 2                       |

1276

1277 Values in mean +/- standard error.  $n = ten$  10,000 ms-long simulations for the base model, and  $n = 12$  animals for  
1278 the data from Buss and Drapeau (2001).

1279

1280

1281 **Table 2. Parameter values of neurons**

| Model Population |                                                    | <i>a</i> | <i>b</i> | <i>c</i> | <i>d</i> | <i>V<sub>max</sub></i> | <i>V<sub>r</sub></i> | <i>V<sub>t</sub></i> | <i>k</i> | <i>C</i> | Rostro-caudal position <sup>1</sup> | I <sub>drive</sub> <sup>2</sup> |
|------------------|----------------------------------------------------|----------|----------|----------|----------|------------------------|----------------------|----------------------|----------|----------|-------------------------------------|---------------------------------|
| MN               | Single                                             | 0.5      | 0.1      | -50      | 0.2      | 10                     | -60                  | -45                  | 0.05     | 20       | 5.0 +1.6*n                          |                                 |
|                  | Multiple                                           | 0.5      | 0.1      | -50      | 100      | 10                     | -60                  | -50                  | 0.05     | 20       |                                     |                                 |
|                  | Beat-and-glide                                     | 0.5      | 0.01     | -55      | 100      | 10                     | -65                  | -58                  | 0.5      | 20       |                                     |                                 |
| IC               | Single                                             | 0.0005   | 0.5      | -30      | 5        | 0                      | -60                  | -45                  | 0.05     | 50       | 1.0                                 | 50                              |
|                  | Multiple                                           | 0.0002   | 0.5      | -40      | 5        | 0                      | -60                  | -45                  | 0.03     | 50       |                                     | 35                              |
| V0d              | Single                                             | 0.5      | 0.01     | -50      | 0.2      | 10                     | -60                  | -45                  | 0.05     | 20       | 5.0 +1.6*n                          |                                 |
|                  | Multiple                                           | 0.02     | 0.1      | -30      | 3.75     | 10                     | -60                  | -45                  | 0.09     | 6        |                                     |                                 |
| dl6              | Beat-and-glide (all models)                        | 0.1      | 0.002    | -55      | 4        | 10                     | -60                  | -54                  | 0.3      | 10       | 5.1 +1.6*n                          |                                 |
| V0v              | Multiple                                           | 0.02     | 0.1      | -30      | 11.6     | 10                     | -60                  | -45                  | 0.05     | 20       | 5.1 +1.6*n                          |                                 |
|                  | Beat-and-glide (base)                              | 0.01     | 0.002    | -55      | 8        | 10                     | -60                  | -54                  | 0.3      | 10       |                                     |                                 |
|                  | Beat-and-glide (bursting V2a and all tonic models) | 0.1      | 0.002    | -55      | 4        | 10                     | -60                  | -54                  | 0.3      | 10       |                                     |                                 |
| V2a              | Multiple                                           | 0.5      | 0.1      | -40      | 100      | 10                     | -60                  | -45                  | 0.05     | 20       | 5.1+1.6*n                           |                                 |
|                  | Beat-and-glide (base and all tonic models)         | 0.1      | 0.002    | -55      | 4        | 10                     | -60                  | -54                  | 0.3      | 10       |                                     | 2.89                            |
|                  | Beat-and-glide (bursting V2a model)                | 0.01     | 0.002    | -55      | 8        | 10                     | -60                  | -54                  | 0.3      | 10       |                                     | 3.05                            |
| V1               | Beat-and-glide (all models)                        | 0.1      | 0.002    | -55      | 4        | 10                     | -60                  | -54                  | 0.3      | 10       | 7.1 +1.6*n                          |                                 |

1282

1283

1284 <sup>1</sup>*n* = 0 to *N*-1, *N* being the total number of neurons in that given population.

1285 <sup>2</sup>Amplitude of tonic motor command drive.

1286 **Table 3.** *Electrical synapse (gap junctions) weights between neuron populations.*

| <b>Coiling<br/>Beat-and-glide</b> | <b>MN</b> | <b>IC</b> | <b>V0d<br/>dl6</b> | <b>V0v</b> | <b>V2a</b> |
|-----------------------------------|-----------|-----------|--------------------|------------|------------|
| <b>MN</b>                         |           |           |                    |            |            |
| Single-coiling                    | 0.1       |           |                    |            |            |
| Double-coiling                    | 0.07      |           |                    |            |            |
| Beat-and-glide (all models)       | 0.005     |           |                    |            |            |
| <b>IC</b>                         |           |           |                    |            |            |
| Single-coiling                    | 0.04      | 0.001     |                    |            |            |
| Double-coiling                    | 0.03      | 0.0001    |                    |            |            |
| <b>V0d or dl6</b>                 |           |           |                    |            |            |
| Single-coiling                    | 0.01      | 0.05      | 0.04               |            |            |
| Double-coiling                    | 0.0001    | 0.05      | 0.04               |            |            |
| Beat-and-glide (all models)       | 0.0001    |           | 0.04               |            |            |
| <b>V0v</b>                        |           |           |                    |            |            |
| Double-coiling                    | 0.0001    | 0.0005    |                    | 0.05       |            |
| Beat-and-glide (all models)       | 0.005     |           |                    | 0.05       |            |
| <b>V2a</b>                        |           |           |                    |            |            |
| Double-coiling                    | 0.005     | 0.15      |                    |            | 0.005      |
| Beat-and-glide (all models)       | 0.005     |           |                    |            | 0.005      |

1287

1288

1289 **Table 4.** Chemical synapse weights between neuron populations. Pre-synaptic neurons are in  
 1290 rows. Post-synaptic neurons in columns.

| Pre-synaptic |                                    | Post-synaptic |       |            |       |      |     |        |
|--------------|------------------------------------|---------------|-------|------------|-------|------|-----|--------|
|              |                                    | MN            | IC    | V0d<br>dl6 | V0v   | V2a  | V1  | Muscle |
| <b>MN</b>    | Single coiling                     |               |       |            |       |      |     | 0.015  |
|              | Double coiling                     |               |       |            |       |      |     | 0.02   |
|              | Beat-and-glide (all models)        |               |       |            |       |      |     | 0.1    |
| <b>V0d</b>   | Single coiling                     | 0.3           | 0.3   |            |       |      |     |        |
|              | Double coiling                     | 2.0           | 2.0   |            |       | 2.0  |     |        |
| <b>dl6</b>   | Beat-and-glide (base)              | 1.5           |       | 0.25*      |       | 1.5  |     |        |
|              | Beat-and-glide (bursting V2a)      | 1.5           |       | 0.25*      |       | 2.0  |     |        |
|              | Beat-and-glide (all tonic neurons) | 1.5           |       | 0.25*      |       | 1.5  |     |        |
| <b>V0v</b>   | Double coiling                     |               | 0.175 |            |       |      |     |        |
|              | Beat-and-glide (base)              |               |       |            |       | 0.4  |     |        |
|              | Beat-and-glide (bursting V2a)      |               |       |            |       | 0.75 |     |        |
|              | Beat-and-glide (all tonic neurons) |               |       |            |       | 0.4  |     |        |
| <b>V2a</b>   | Double coiling                     |               |       |            | 0.04  |      |     |        |
|              | Beat-and-glide (base)              | 0.5           |       | 0.5        | 0.3   | 0.3  | 0.5 |        |
|              | Beat-and-glide (bursting V2a)      | 0.5           |       | 0.75       | 0.275 | 0.3  | 0.5 |        |
|              | Beat-and-glide (all tonic neurons) | 0.5           |       | 0.5        | 0.25  | 0.3  |     |        |
| <b>V1</b>    | Beat-and-glide (base)              | 1.0           |       | 0.2        | 0.1   | 0.5  |     |        |
|              | Beat-and-glide (bursting V2a)      | 1.0           |       | 0.2        | 0.1   | 0.5  |     |        |
|              | Beat-and-glide (all tonic neurons) | 1.0           |       | 0.2        | 0.1   | 0.6  |     |        |

1291

1292 \*Scaled by a random number selected from a gaussian distribution with mean of 1 and variance of 0.1.

1293 **Table 5.** *Glutamatergic and glycinergic reversal potentials and time constants*

| <b>Chemical Synapse</b> | $E_{rev}$      | $\tau_r$ | $\tau_f$ | $V_{thr}$ |
|-------------------------|----------------|----------|----------|-----------|
| <b>Glutamatergic</b>    | 0              | 0.5      | 1.0      | -15       |
| <b>Glycinergic</b>      | -45, -58, -70* | 0.5      | 1.0      | -15       |

1294

1295 \* *for single and double coiling and beat-and-glide swimming models, respectively.*

1296

1297 **REFERENCES**

1298

1299 Ampatzis, K., Song, J., Ausborn, J., & El Manira, A. (2013). Pattern of Innervation and

1300 Recruitment of Different Classes of Motoneurons in Adult Zebrafish. *Journal of*

1301 *Neuroscience*, 33(26), 10875–10886. <https://doi.org/10.1523/JNEUROSCI.0896-13.2013>

1302 Ampatzis, K., Song, J., Ausborn, J., & ElManira, A. (2014). Separate Microcircuit Modules of

1303 Distinct V2a Interneurons and Motoneurons Control the Speed of Locomotion. *Neuron*,

1304 83(4), 934–943. <https://doi.org/10.1016/j.neuron.2014.07.018>

1305 Anderson, T. M., Abbinanti, M. D., Peck, J. H., Gilmour, M., Brownstone, R. M., & Masino, M.

1306 A. (2012). Low-threshold calcium currents contribute to locomotor-like activity in

1307 neonatal mice. *Journal of Neurophysiology*, 107(1), 103–113.

1308 <https://doi.org/10.1152/jn.00583.2011>

1309 Ausborn, J., Shevtsova, N. A., Caggiano, V., Danner, S. M., & Rybak, I. A. (2019).

1310 Computational modeling of brainstem circuits controlling locomotor frequency and gait.

1311 *ELife*, 8. <https://doi.org/10.7554/eLife.43587>

1312 Bagnall, M. W., & McLean, D. L. (2014). Modular organization of axial microcircuits in

1313 zebrafish. *Science*, 343(6167), 197–200. <https://doi.org/10.1126/science.1245629>

1314 Ben-Ari, Y. (2002). Excitatory actions of GABA during development: The nature of the nurture.

1315 *Nature Reviews Neuroscience*, 3(9), 728–739. <https://doi.org/10.1038/nrn920>

1316 Bennett, M. V. L., & Zukin, R. S. (2004). Electrical Coupling and Neuronal Synchronization in

1317 the Mammalian Brain. *Neuron*. [https://doi.org/10.1016/S0896-6273\(04\)00043-1](https://doi.org/10.1016/S0896-6273(04)00043-1)

1318 Bernhardt, R. R., Chitnis, A. B., Lindamer, L., & Kuwada, J. Y. (1990). Identification of spinal

1319 neurons in the embryonic and larval zebrafish. *Journal of Comparative Neurology*.

1320 <https://doi.org/10.1002/cne.903020315>

- 1321 Bicanski, A., Ryczko, D., Cabelguen, J.-M., & Ijspeert, A. J. (2013). From lamprey to  
1322 salamander: An exploratory modeling study on the architecture of the spinal locomotor  
1323 networks in the salamander. *Biological Cybernetics*, *107*(5), 565–587.  
1324 <https://doi.org/10.1007/s00422-012-0538-y>
- 1325 Björnfors, E. R., & El Manira, A. (2016). Functional diversity of excitatory commissural  
1326 interneurons in adult zebrafish. *ELife*. <https://doi.org/10.7554/eLife.18579>
- 1327 Böhm, U. L., Prendergast, A., Djenoune, L., Figueiredo, S. N., Gomez, J., Stokes, C., Kaiser, S.,  
1328 Suster, M., Kawakami, K., Charpentier, M., Concordet, J. P., Rio, J. P., Del Bene, F., &  
1329 Wyart, C. (2016). CSF-contacting neurons regulate locomotion by relaying mechanical  
1330 stimuli to spinal circuits. *Nature Communications*, *7*, 1–8.  
1331 <https://doi.org/10.1038/ncomms10866>
- 1332 Brustein, E. (2005). Serotonergic Modulation of Chloride Homeostasis during Maturation of  
1333 the Locomotor Network in Zebrafish. *Journal of Neuroscience*, *25*(46), 10607–10616.  
1334 <https://doi.org/10.1523/JNEUROSCI.2017-05.2005>
- 1335 Brustein, E., Chong, M., Holmqvist, B., & Drapeau, P. (2003). Serotonin Patterns Locomotor  
1336 Network Activity in the Developing Zebrafish by Modulating Quiescent Periods. *Journal*  
1337 *of Neurobiology*, *57*(3), 303–322. <https://doi.org/10.1002/neu.10292>
- 1338 Budick, S. A., & O'Malley, D. M. (2000). Locomotor repertoire of the larval zebrafish:  
1339 Swimming, turning and prey capture. *The Journal of Experimental Biology*, *203*(Pt 17),  
1340 2565–2579.
- 1341 Buss, R. R., & Drapeau, P. (2000). Physiological properties of zebrafish embryonic red and  
1342 white muscle fibers during early development. *Journal of Neurophysiology*.



- 1343 Buss, R. R., & Drapeau, P. (2001). Synaptic drive to motoneurons during fictive swimming in  
1344 the developing zebrafish. *Journal of Neurophysiology*, *86*(1), 197–210.
- 1345 Callahan, R. A., Roberts, R., Sengupta, M., Kimura, Y., Higashijima, S.-I., & Bagnall, M. W.  
1346 (2019). Spinal V2b neurons reveal a role for ipsilateral inhibition in speed control. *ELife*,  
1347 *8*. <https://doi.org/10.7554/eLife.47837>
- 1348 Danner, S. M., Zhang, H., Shevtsova, N. A., Borowska-Fielding, J., Deska-Gauthier, D., Rybak,  
1349 I. A., & Zhang, Y. (2019). Spinal V3 Interneurons and Left-Right Coordination in  
1350 Mammalian Locomotion. *Frontiers in Cellular Neuroscience*, *13*, 516.  
1351 <https://doi.org/10.3389/fncel.2019.00516>
- 1352 Del Negro, C. A., Hayes, J. A., Pace, R. W., Brush, B. R., Teruyama, R., & Feldman, J. L.  
1353 (2010). Synaptically activated burst-generating conductances may underlie a group-  
1354 pacemaker mechanism for respiratory rhythm generation in mammals. *Progress in Brain*  
1355 *Research*, *187*, 111–136. <https://doi.org/10.1016/B978-0-444-53613-6.00008-3>
- 1356 Domenici, P., & Hale, M. E. (2019). Escape responses of fish: A review of the diversity in motor  
1357 control, kinematics and behaviour. *Journal of Experimental Biology*, *222*(18).  
1358 <https://doi.org/10.1242/jeb.166009>
- 1359 Drapeau, P., Ali, D. W., Buss, R. R., & Saint-Amant, L. (1999). In vivo recording from  
1360 identifiable neurons of the locomotor network in the developing zebrafish. *Journal of*  
1361 *Neuroscience Methods*, *88*(1), 1–13. [https://doi.org/10.1016/S0165-0270\(99\)00008-4](https://doi.org/10.1016/S0165-0270(99)00008-4)
- 1362 Drapeau, P., Saint-Amant, L., Buss, R. R., Chong, M., McDearmid, J. R., & Brustein, E. (2002).  
1363 Development of the locomotor network in zebrafish. *Progress in Neurobiology*, *68*(2),  
1364 85–111. [https://doi.org/10.1016/S0301-0082\(02\)00075-8](https://doi.org/10.1016/S0301-0082(02)00075-8)

- 1365 Eklof-Ljunggren, E., Haupt, S., Ausborn, J., Dehnisch, I., Uhlen, P., Higashijima, S. -i., & El  
1366 Manira, A. (2012). Origin of excitation underlying locomotion in the spinal circuit of  
1367 zebrafish. *Proceedings of the National Academy of Sciences*, *109*(14), 5511–5516.  
1368 <https://doi.org/10.1073/pnas.1115377109>
- 1369 England, S., Batista, M. F., Mich, J. K., Chen, J. K., & Lewis, K. E. (2011). Roles of Hedgehog  
1370 pathway components and retinoic acid signalling in specifying zebrafish ventral spinal  
1371 cord neurons. *Development (Cambridge, England)*, *138*(23), 5121–5134.  
1372 <https://doi.org/10.1242/dev.066159>
- 1373 Favero, M., Cangiano, A., & Busetto, G. (2014). The timing of activity is a regulatory signal  
1374 during development of neural connections. *Journal of Molecular Neuroscience*, *53*(3),  
1375 324–329. <https://doi.org/10.1007/s12031-013-0128-z>
- 1376 Ferrario, A., Merrison-Hort, R., Soffe, S. R., & Borisyuk, R. (2018). Structural and functional  
1377 properties of a probabilistic model of neuronal connectivity in a simple locomotor  
1378 network. *ELife*, *7*. <https://doi.org/10.7554/eLife.33281>
- 1379 Gabriel, J. P., Mahmood, R., Kyriakatos, A., Soll, I., Hauptmann, G., Calabrese, R. L., & El  
1380 Manira, A. (2009). Serotonergic Modulation of Locomotion in Zebrafish—Endogenous  
1381 Release and Synaptic Mechanisms. *Journal of Neuroscience*, *29*(33), 10387–10395.  
1382 <https://doi.org/10.1523/JNEUROSCI.1978-09.2009>
- 1383 Goldman, M. S., Golowasch, J., Marder, E., & Abbott, L. F. (2001). Global Structure,  
1384 Robustness, and Modulation of Neuronal Models. *The Journal of Neuroscience*, *21*(14),  
1385 5229–5238. <https://doi.org/10.1523/JNEUROSCI.21-14-05229.2001>

- 1386 Golowasch, J., & Marder, E. (1992). Ionic currents of the lateral pyloric neuron of the  
1387 stomatogastric ganglion of the crab. *Journal of Neurophysiology*, 67(2), 318–331.  
1388 <https://doi.org/10.1152/jn.1992.67.2.318>
- 1389 Higashijima, S. I., Mandel, G., & Fetcho, J. R. (2004). Distribution of prospective glutamatergic,  
1390 glycinergic, and gabaergic neurons in embryonic and larval zebrafish. *Journal of*  
1391 *Comparative Neurology*, 480(1), 1–8. <https://doi.org/10.1002/cne.20278>
- 1392 Hull, M. J., Soffe, S. R., Willshaw, D. J., & Roberts, A. (2016). Modelling Feedback Excitation,  
1393 Pacemaker Properties and Sensory Switching of Electrically Coupled Brainstem Neurons  
1394 Controlling Rhythmic Activity. *PLoS Computational Biology*, 12(1), e1004702.  
1395 <https://doi.org/10.1371/journal.pcbi.1004702>
- 1396 Ijspeert, A. J., Crespi, A., Ryczko, D., & Cabelguen, J.-M. (2007). From swimming to walking  
1397 with a salamander robot driven by a spinal cord model. *Science (New York, N.Y.)*,  
1398 315(5817), 1416–1420. <https://doi.org/10.1126/science.1138353>
- 1399 Izhikevich, E. M. (2007). *Dynamical Systems in Neuroscience: The Geometry of Excitability and*  
1400 *Bursting*. The MIT Press.
- 1401 Jay, M., De Faveri, F., & McDearmid, J. R. (2015). Firing dynamics and modulatory actions of  
1402 supraspinal dopaminergic neurons during zebrafish locomotor behavior. *Current Biology*,  
1403 25(4), 435–444. <https://doi.org/10.1016/j.cub.2014.12.033>
- 1404 Jay, M., & McLean, D. L. (2019). Reconciling the functions of even-skipped interneurons during  
1405 crawling, swimming, and walking. *Current Opinion in Physiology*, 8, 188–192.  
1406 <https://doi.org/10.1016/j.cophys.2019.02.003>

- 1407 Jha, U., & Thirumalai, V. (2020). Neuromodulatory Selection of Motor Neuron Recruitment  
1408 Patterns in a Visuomotor Behavior Increases Speed. *Current Biology: CB*, *30*(5), 788-  
1409 801.e3. <https://doi.org/10.1016/j.cub.2019.12.064>
- 1410 Kimmel, C. B., Ballard, W. W., Kimmel, S. R., Ullmann, B., & Schilling, T. F. (1995). Stages of  
1411 embryonic development of the zebrafish. *Developmental Dynamics*, *203*(3), 253–310.  
1412 <https://doi.org/10.1002/aja.1002030302>
- 1413 Kimmel, C. B., Warga, R. M., & Kane, D. A. (1994). Cell cycles and clonal strings during  
1414 formation of the zebrafish central nervous system. *Development (Cambridge, England)*,  
1415 *120*(2), 265–276.
- 1416 Kimura, Y., & Higashijima, S.-I. (2019). Regulation of locomotor speed and selection of active  
1417 sets of neurons by V1 neurons. *Nature Communications*, *10*(1), 2268.  
1418 <https://doi.org/10.1038/s41467-019-09871-x>
- 1419 Kimura, Y., Satou, C., Fujioka, S., Shoji, W., Umeda, K., Ishizuka, T., Yawo, H., &  
1420 Higashijima, S. I. (2013). Hindbrain V2a neurons in the excitation of spinal locomotor  
1421 circuits during zebrafish swimming. *Current Biology*, *23*(10), 843–849.  
1422 <https://doi.org/10.1016/j.cub.2013.03.066>
- 1423 Knogler, L. D., Ryan, J., Saint-Amant, L., & Drapeau, P. (2014). A Hybrid Electrical/Chemical  
1424 Circuit in the Spinal Cord Generates a Transient Embryonic Motor Behavior. *Journal of*  
1425 *Neuroscience*, *34*(29), 9644–9655. <https://doi.org/10.1523/JNEUROSCI.1225-14.2014>
- 1426 Kozlov, A., Huss, M., Lansner, A., Koteleski, J. H., & Grillner, S. (2009). Simple cellular and  
1427 network control principles govern complex patterns of motor behavior. *Proceedings of*  
1428 *the National Academy of Sciences*, *106*(47), 20027–20032.  
1429 <https://doi.org/10.1073/pnas.0906722106>

- 1430 Kozlov, A. K., Kardamakis, A. A., Hellgren Kotaleski, J., & Grillner, S. (2014). Gating of  
1431 steering signals through phasic modulation of reticulospinal neurons during locomotion.  
1432 *Proceedings of the National Academy of Sciences*, *111*(9), 3591–3596.  
1433 <https://doi.org/10.1073/pnas.1401459111>
- 1434 Lambert, A. M., Bonkowsky, J. L., & Masino, M. A. (2012). The Conserved Dopaminergic  
1435 Diencephalospinal Tract Mediates Vertebrate Locomotor Development in Zebrafish  
1436 Larvae. *Journal of Neuroscience*, *32*(39), 13488–13500.  
1437 <https://doi.org/10.1523/JNEUROSCI.1638-12.2012>
- 1438 Liao, J. C., & Fetcho, J. R. (2008). Shared versus Specialized Glycinergic Spinal Interneurons in  
1439 Axial Motor Circuits of Larval Zebrafish. *Journal of Neuroscience*, *28*(48), 12982–  
1440 12992. <https://doi.org/10.1523/JNEUROSCI.3330-08.2008>
- 1441 Liu, D. W., & Westerfield, M. (1988). Function of identified motoneurons and coordination of  
1442 primary and secondary motor systems during zebra fish swimming. *The Journal of*  
1443 *Physiology*, *403*(1), 73–89. <https://doi.org/10.1113/jphysiol.1988.sp017239>
- 1444 Liu, Y. C., & Hale, M. E. (2017). Local Spinal Cord Circuits and Bilateral Mauthner Cell  
1445 Activity Function Together to Drive Alternative Startle Behaviors. *Current Biology*,  
1446 *27*(5), 697–704. <https://doi.org/10.1016/j.cub.2017.01.019>
- 1447 Ljunggren, E. E., Haupt, S., Ausborn, J., Ampatzis, K., & El Manira, A. (2014). Optogenetic  
1448 Activation of Excitatory Premotor Interneurons Is Sufficient to Generate Coordinated  
1449 Locomotor Activity in Larval Zebrafish. *Journal of Neuroscience*, *34*(1), 134–139.  
1450 <https://doi.org/10.1523/JNEUROSCI.4087-13.2014>

- 1451 Marder, E., & Taylor, A. L. (2011). Multiple models to capture the variability in biological  
1452 neurons and networks. *Nature Neuroscience*, *14*(2), 133–138.  
1453 <https://doi.org/10.1038/nn.2735>
- 1454 McDermid, J. J. R., & Drapeau, P. (2006). Rhythmic Motor Activity Evoked by NMDA in the  
1455 Spinal Zebrafish Larva. *Journal of Neurophysiology*, *95*(1), 401–417.  
1456 <https://doi.org/10.1152/jn.00844.2005>
- 1457 McLean, D. L., Fan, J., Higashijima, S. I., Hale, M. E., & Fetcho, J. R. (2007). A topographic  
1458 map of recruitment in spinal cord. *Nature*, *446*(7131), 71–75.  
1459 <https://doi.org/10.1038/nature05588>
- 1460 McLean, D. L., & Fetcho, J. R. (2009). Spinal Interneurons Differentiate Sequentially from  
1461 Those Driving the Fastest Swimming Movements in Larval Zebrafish to Those Driving  
1462 the Slowest Ones. *Journal of Neuroscience*. [https://doi.org/10.1523/jneurosci.3277-](https://doi.org/10.1523/jneurosci.3277-09.2009)  
1463 [09.2009](https://doi.org/10.1523/jneurosci.3277-09.2009)
- 1464 McLean, D. L., Masino, M. A., Koh, I. Y. Y., Lindquist, W. B., & Fetcho, J. R. (2008).  
1465 Continuous shifts in the active set of spinal interneurons during changes in locomotor  
1466 speed. *Nature Neuroscience*, *11*(12), 1419–1429. <https://doi.org/10.1038/nn.2225>
- 1467 Menelaou, E., & McLean, D. L. (2012). A Gradient in Endogenous Rhythmicity and Oscillatory  
1468 Drive Matches Recruitment Order in an Axial Motor Pool. *Journal of Neuroscience*,  
1469 *32*(32), 10925–10939. <https://doi.org/10.1523/JNEUROSCI.1809-12.2012>
- 1470 Menelaou, E., & McLean, D. L. (2019). Hierarchical control of locomotion by distinct types of  
1471 spinal V2a interneurons in zebrafish. *Nature Communications*, *10*(1), 4197.  
1472 <https://doi.org/10.1038/s41467-019-12240-3>

- 1473 Messina, J. A., St. Paul, A., Hargis, S., Thompson, W. E., & McClellan, A. D. (2017).  
1474 Elimination of Left-Right Reciprocal Coupling in the Adult Lamprey Spinal Cord  
1475 Abolishes the Generation of Locomotor Activity. *Front. Neural Circuits*, *11*(89).  
1476 <https://doi.org/10.3389/fncir.2017.00089>
- 1477 Montgomery, J. E., Wahlstrom-Helgren, S., Wiggin, T. D., Corwin, B. M., Lillesaar, C., &  
1478 Masino, M. A. (2018). Intraspinal serotonergic signaling suppresses locomotor activity in  
1479 larval zebrafish. *Developmental Neurobiology*. <https://doi.org/10.1002/dneu.22606>
- 1480 Myers, P. Z., Eisen, J. S., & Westerfield, M. (1986). Development and axonal outgrowth of  
1481 identified motoneurons in the zebrafish. *The Journal of Neuroscience : The Official*  
1482 *Journal of the Society for Neuroscience*, *6*(8), 2278–2289.  
1483 <https://doi.org/10.1523/JNEUROSCI.06-08-02278.1986>
- 1484 Picton, L. D., Bertuzzi, M., Pallucchi, I., Fontanel, P., Dahlberg, E., Björnfors, E. R., Iacoviello,  
1485 F., Shearing, P. R., & El Manira, A. (2021). A spinal organ of proprioception for  
1486 integrated motor action feedback. *Neuron*, *109*(7), 1188-1201.e7.  
1487 <https://doi.org/10.1016/j.neuron.2021.01.018>
- 1488 Roussel, Y., Paradis, M., Gaudreau, S. F., Lindsey, B. W., & Bui, T. V. (2020). Spatiotemporal  
1489 Transition in the Role of Synaptic Inhibition to the Tail Beat Rhythm of Developing  
1490 Larval Zebrafish. *ENeuro*, *7*(1). <https://doi.org/10.1523/ENEURO.0508-18.2020>
- 1491 Ryczko, D., Charrier, V., Ijspeert, A., & Cabelguen, J.-M. (2010). Segmental oscillators in axial  
1492 motor circuits of the salamander: Distribution and bursting mechanisms. *Journal of*  
1493 *Neurophysiology*, *104*(5), 2677–2692. <https://doi.org/10.1152/jn.00479.2010>
- 1494 Saint-Amant, L. (2010). *Development of motor rhythms in zebrafish embryos* (Vol. 187).  
1495 Elsevier B.V. <https://doi.org/10.1016/B978-0-444-53613-6.00004-6>

- 1496 Saint-Amant, L., & Drapeau, P. (1998). Time course of the development of motor behaviors in  
1497 the zebrafish embryo. *Journal of Neurobiology*, *37*(4), 622–632.  
1498 [https://doi.org/10.1002/\(SICI\)1097-4695\(199812\)37:4<622::AID-NEU10>3.0.CO;2-S](https://doi.org/10.1002/(SICI)1097-4695(199812)37:4<622::AID-NEU10>3.0.CO;2-S)
- 1499 Saint-Amant, L., & Drapeau, P. (2000). Motoneuron activity patterns related to the earliest  
1500 behavior of the zebrafish embryo. *The Journal of Neuroscience : The Official Journal of*  
1501 *the Society for Neuroscience*, *20*(11), 3964–3972.
- 1502 Saint-Amant, L., & Drapeau, P. (2001). Synchronization of an embryonic network of identified  
1503 spinal interneurons solely by electrical coupling. *Neuron*, *31*(6), 1035–1046.  
1504 [https://doi.org/10.1016/S0896-6273\(01\)00416-0](https://doi.org/10.1016/S0896-6273(01)00416-0)
- 1505 Satou, C., Kimura, Y., & Higashijima, S. (2012). Generation of multiple classes of V0 neurons in  
1506 zebrafish spinal cord: Progenitor heterogeneity and temporal control of neuronal  
1507 diversity. *The Journal of Neuroscience: The Official Journal of the Society for*  
1508 *Neuroscience*, *32*(5), 1771–1783. <https://doi.org/10.1523/JNEUROSCI.5500-11.2012>
- 1509 Satou, C., Sugioka, T., Uemura, Y., Shimazaki, T., Zmarz, P., Kimura, Y., & Higashijima, S.-I.  
1510 (2020). Functional Diversity of Glycinergic Commissural Inhibitory Neurons in Larval  
1511 Zebrafish. *Cell Reports*, *30*(9), 3036-3050.e4.  
1512 <https://doi.org/10.1016/j.celrep.2020.02.015>
- 1513 Sautois, B., Soffe, S. R., Li, W.-C., & Roberts, A. (2007). Role of type-specific neuron  
1514 properties in a spinal cord motor network. *Journal of Computational Neuroscience*,  
1515 *23*(1), 59–77. <https://doi.org/10.1007/s10827-006-0019-1>
- 1516 Sengupta, M., Daliparthi, V., Roussel, Y., Bui, T. V., & Bagnall, M. W. (2021). Spinal V1  
1517 neurons inhibit motor targets locally and sensory targets distally. *Current Biology*, *0*(0).  
1518 <https://doi.org/10.1016/j.cub.2021.06.053>



- 1519 Song, J., Dahlberg, E., & El Manira, A. (2018). V2a interneuron diversity tailors spinal circuit  
1520 organization to control the vigor of locomotor movements. *Nature Communications*, 9(1),  
1521 1–14. <https://doi.org/10.1038/s41467-018-05827-9>
- 1522 Song, J., Pallucchi, I., Ausborn, J., Ampatzis, K., Bertuzzi, M., Fontanel, P., Picton, L. D., & El  
1523 Manira, A. (2020). Multiple Rhythm-Generating Circuits Act in Tandem with Pacemaker  
1524 Properties to Control the Start and Speed of Locomotion. *Neuron*.  
1525 <https://doi.org/10.1016/j.neuron.2019.12.030>
- 1526 Stickney, H. L., Barresi, M. J. F., & Devoto, S. H. (2000). Somite development in zebrafish.  
1527 *Developmental Dynamics*, 219(3), 287–303. [https://doi.org/10.1002/1097-](https://doi.org/10.1002/1097-0177(2000)9999:9999<::AID-DVDY1065>3.0.CO;2-A)  
1528 0177(2000)9999:9999<::AID-DVDY1065>3.0.CO;2-A
- 1529 Taylor, A. L., Goillard, J.-M., & Marder, E. (2009). How multiple conductances determine  
1530 electrophysiological properties in a multicompartment model. *The Journal of*  
1531 *Neuroscience: The Official Journal of the Society for Neuroscience*, 29(17), 5573–5586.  
1532 <https://doi.org/10.1523/JNEUROSCI.4438-08.2009>
- 1533 Tazerart, S., Viemari, J.-C., Darbon, P., Vinay, L., & Brocard, F. (2007). Contribution of  
1534 Persistent Sodium Current to Locomotor Pattern Generation in Neonatal Rats. *Journal of*  
1535 *Neurophysiology*, 98(2), 613–628. <https://doi.org/10.1152/jn.00316.2007>
- 1536 Tong, H., & McDearmid, J. R. (2012). Pacemaker and plateau potentials shape output of a  
1537 developing locomotor network. *Current Biology*, 22(24), 2285–2293.  
1538 <https://doi.org/10.1016/j.cub.2012.10.025>
- 1539 Vogelstein, J. T., Park, Y., Ohyama, T., Kerr, R. A., Truman, J. W., Priebe, C. E., & Zlatic, M.  
1540 (2014). Discovery of brainwide neural-behavioral maps via multiscale unsupervised

- 1541 structure learning. *Science (New York, N.Y.)*, 344(6182), 386–392.
- 1542 <https://doi.org/10.1126/science.1250298>
- 1543 Wahlstrom-Helgren, S., Montgomery, J. E., Vanpelt, K. T., Biltz, S. L., Peck, J. H., & Masino,  
1544 M. A. (2019). Glutamate receptor subtypes differentially contribute to optogenetically  
1545 activated swimming in spinally transected zebrafish larvae. *Journal of Neurophysiology*,  
1546 122(6), 2414–2426. <https://doi.org/10.1152/jn.00337.2019>
- 1547 Warp, E., Agarwal, G., Wyart, C., Friedmann, D., Oldfield, C. S., Conner, A., Del Bene, F.,  
1548 Arrenberg, A. B., Baier, H., & Isacoff, E. Y. (2012). Emergence of patterned activity in  
1549 the developing zebrafish spinal cord. *Current Biology: CB*, 22(2), 93–102.  
1550 <https://doi.org/10.1016/j.cub.2011.12.002>
- 1551 Wiggin, T. D., Anderson, T. M., Eian, J., Peck, J. H., & Masino, M. A. (2012). Episodic  
1552 swimming in the larval zebrafish is generated by a spatially distributed spinal network  
1553 with modular functional organization. *Journal of Neurophysiology*, 108(3), 925–934.  
1554 <https://doi.org/10.1152/jn.00233.2012>
- 1555 Wiggin, T. D., Peck, J. H., & Masino, M. A. (2014). Coordination of fictive motor activity in the  
1556 larval zebrafish is generated by non-segmental mechanisms. *PLoS ONE*, 9(10).  
1557 <https://doi.org/10.1371/journal.pone.0109117>
- 1558 Yang, L., Rastegar, S., & Strähle, U. (2010). Regulatory interactions specifying Kolmer-Agduhr  
1559 interneurons. *Development (Cambridge, England)*, 137(16), 2713–2722.  
1560 <https://doi.org/10.1242/dev.048470>
- 1561 Zhong, G., Masino, M. A., & Harris-Warrick, R. M. (2007). Persistent Sodium Currents  
1562 Participate in Fictive Locomotion Generation in Neonatal Mouse Spinal Cord. *Journal of*  
1563 *Neuroscience*, 27(17), 4507–4518. <https://doi.org/10.1523/JNEUROSCI.0124-07.2007>

1564

1565 **FIGURE TITLES AND LEGENDS**

1566

1567 **Figure 1. Simulation of the spinal locomotor circuit coupled to a musculoskeletal model**

1568 **during a beat-and-glide swimming episode. (A)** Schematic of locomotor movements during

1569 the development of zebrafish. **(B)** Schematic of a fish body with 10<sup>th</sup> somite outlined. **(C)**

1570 Motoneuron membrane potential ( $V_m$ ) in the 10<sup>th</sup> somite during a single beat-and-glide

1571 swimming episode from our model is used to calculate this body segment's body angle variation

1572 **(D)** in a musculoskeletal model. **(E)** Several representative body midlines from this episode of

1573 beat-and-glide swimming. Body midline is computed by compiling all the calculated local body

1574 angles along the simulated fish body. **(F)** Heat-map of local body angle (in radians) across the

1575 total body length and through time during the episode. Red is for right curvatures, while blue

1576 labels left curvatures. Body position on the ordinate, 0 is the rostral extremity, while 1 is the

1577 caudal extremity. In **D-F**, the magenta to yellow color coding represents the progression through

1578 the swimming episode depicted.

1579

1580 **Figure 2. Single coiling model driven by pacemaker neurons. (A)** Schematic of the single

1581 coiling model. The dashed line indicates the body midline. Gray arrows indicate descending

1582 motor command. **(B)** Membrane potential ( $V_m$ ) response of isolated spinal neuron models to a

1583 depolarizing current step. **(C)**  $V_m$  of spinal neurons during a simulation with a tonic command to

1584 left pacemakers only. Note the synaptic bursts in grey in the right MNs and IC neurons (a blue

1585 arrow marks an example). The  $V_m$  of a rostral (lightest), middle, and caudal (darkest) neuron is

1586 shown, except for IC neurons that are all in a rostral kernel. **(D)** Periodic depolarizations in a

1587 hyperpolarized motoneuron on the same side where single coils are generated. **(E)** The phase

1588 delay of left neurons in relation to ipsilateral spinal neurons in the 1st somite and an IC in the

1589 rostral kernel in a 10,000 ms simulation. The reference neuron for each polar plot is labelled, and

1590 all neurons follow the same color-coding as the rest of the figure. A negative phase delay

1591 indicates that the reference neuron precedes the neuron to which it is compared. A phase of 0

1592 indicates that a pair of neurons is in-phase; a phase of  $\pi$  indicates that a pair of neurons is out-of-

1593 phase. Sensitivity testing showing **(F-I)** coiling frequency and **(J-M)** proportion of full coils

1594 during ten 20,000 ms simulation runs at each value of  $\sigma_d$ ,  $\sigma_l$ ,  $\sigma_p$ , and  $\sigma_w$  tested. Each run is

1595 color-coded. L: left, R: right. **Statistics:** Asterisks denote significant differences detected using a  
1596 one-factor ANOVA test. **(F)**  $F_{5,59} = 10.4$ ,  $p = 5.2 \times 10^{-7}$ . **(G)**  $F_{5,59} = 2.4$ ,  $p = 0.05$ . **(H)**  $F_{5,59} = 5.2$ ,  
1597  $p = 0.0006$ . **(I)**  $F_{5,59} = 2.2$ ,  $p = 0.07$ . **(J)**  $F_{5,59} = 10.9$ ,  $p = 2.7 \times 10^{-7}$ . **(K)**  $F_{5,59} = 4.9$ ,  $p = 0.0009$ .  
1598 (Note that there were no pairwise differences detected). **(L)**  $F_{5,59} = 6.5$ ,  $p = 8.2 \times 10^{-5}$ . **(M)**  $F_{5,59} =$   
1599  $8.8$ ,  $p = 3.5 \times 10^{-6}$ . P-values for t-tests are found in **Figure 2 - supplementary table 1**.

1600 See also **Figure 2 - figure supplement 1** and **2** and **Figure 2 - video 1** and **2**.

1601  
1602 **Figure 2 - figure supplement 1. Silencing spinal neurons during single coiling.** Simulations  
1603 consisted of three 5,000 ms epochs. In the middle epoch, silencing of targeted spinal neurons was  
1604 achieved by removing all synaptic and external currents from the targeted population. Synaptic  
1605 and external currents were restored in the last epoch. **(A)** Silencing IC neurons silences the other  
1606 spinal neurons. **(B)** Silencing MNs slightly reduces IC burst duration but does not preclude IC  
1607 bursting. **(C)** Silencing V0ds blocks synaptic bursts in contralateral ICs and MNs but does not  
1608 preclude single coils, nor does it lead to multiple coils. The  $V_m$  of a rostral (lightest), middle, and  
1609 caudal (darkest) neuron is shown, except for IC neurons that are all in a rostral kernel. L: left, R:  
1610 right.

1611  
1612 **Figure 2 - figure supplement 2. Membrane potential ( $V_m$ ) during a simulation of a 30-**  
1613 **somite single-coiling model.** The  $V_m$  of a rostral (lightest), middle, and caudal (darkest) neuron  
1614 is shown, except for IC neurons that are all in a rostral kernel. L: left, R: right.

1615  
1616 **Figure 3. Double coiling model relies on a hybrid network of electrical and chemical**  
1617 **synapses.** **(A)** Schematic of the double coiling model. Gap junctions between spinal neurons are  
1618 not depicted. Dashed line indicates the body midline. Gray arrows indicate descending motor  
1619 command. **(B)** Membrane potential ( $V_m$ ) response of isolated spinal neuron models to a  
1620 depolarizing current step. **(C)**  $V_m$  of spinal neurons during a double coil. **(D)** The phase delay of  
1621 left neurons in relation to ipsilateral and contralateral spinal neurons in the 5<sup>th</sup> somite and an IC  
1622 in the rostral kernel during five consecutive left-right double coils. The reference neuron for each  
1623 polar plot is labelled, and all neurons follow the same color-coding as the rest of the figure. A  
1624 negative phase delay indicates that the reference neuron precedes the neuron to which it is  
1625 compared. A phase of 0 indicates that a pair of neurons is in-phase; a phase of  $\pi$  indicates that a

1626 pair of neurons is out-of-phase.  $V_m$  in simulations where (E) the weights of the V2a to V0v and  
1627 the V0v to IC synapses were increased to show that early excitation of V0v prevented the  
1628 initiation of a second coil following a single coil, (F) all glutamatergic transmission was blocked,  
1629 and (G) glycinergic transmission was blocked. (H) *Top row*, mixed event composed of a  
1630 synaptic burst (SB) directly followed by a periodic depolarization (PD) in a motoneuron in  
1631 control but not in glutamate null conditions. *Bottom row*,  $V_m$  in left IC and right V0d during  
1632 events in top row. (I) Proportions of single, double, multiple, and truncated coiling events under  
1633 control, glutamate null ( $\text{Glut}^-$ ), overexcited V0vs (V0v hyper), and glycine null ( $\text{Glycine}^-$ )  
1634 conditions. Each condition was tested with five 100,000 ms runs with  $\sigma_d = 0.5$ ,  $\sigma_p = 0.01$ , and  
1635  $\sigma_w = 0.05$ . (J-M) Sensitivity testing showing proportions of single, double, multiple and  
1636 truncated coiling events during ten 100,000 ms runs for each value of  $\sigma_d$ ,  $\sigma_l$ ,  $\sigma_p$ , and  $\sigma_w$  tested.  
1637 Solid red and gray bars in C,E-G indicate the duration of coils. Chevrons in (C) and (E) denote  
1638 the initial spiking of V0vs and V2as to indicate latency of V0v firing during the first coil. For  
1639 C,E-G, the  $V_m$  of a rostral (lightest), middle, and caudal (darkest) neuron is shown, except for IC  
1640 neurons that are all in a rostral kernel. L: left, R: right.

1641 See also **Figure 3 - figure supplement 1** and **2** and **Figure 3 - video 1-4**.

1642

1643 **Figure 3 – figure supplement 1. Double coiling model with no V2a to V0v synapses, no**  
1644 **contralateral synapses, or with 30 somites.**

1645 (A) Membrane potential ( $V_m$ ) during a simulation without V2a to V0v synapses. V0v neurons  
1646 remain inactive, and there are only single coils. (B) Simulation with no contralateral inhibition or  
1647 excitation. The lack of double and multiple coils, even without contralateral inhibition, suggests  
1648 that contralateral excitation is necessary to generate double and multiple coils. (C) Double  
1649 coiling in a model composed of 30 somites. The  $V_m$  of a rostral (lightest), middle, and caudal  
1650 (darkest) neuron is shown, except for IC neurons that are all in a rostral kernel. L: left, R: right.

1651 See also **Figure 3 - video 5**.

1652

1653 **Figure 3 – figure supplement 2. Sensitivity testing of the double coiling model for the**  
1654 **glycinergic reversal potential ( $E_{gly}$ ), weights of chemical synapses ( $\sigma_w, chem$ ), and weights of**  
1655 **gap junctions ( $\sigma_w, gap$ ).** Sensitivity testing showing proportions of single, double, multiple, and  
1656 truncated coiling events during ten 100,000 ms runs for each value tested.

1657

1658 **Figure 4. The base model for beat-and-glide swimming.** (A) Schematic of the model  
1659 architecture underlying beat-and-glide swimming. (B) Membrane potential ( $V_m$ ) response to a  
1660 depolarizing current step of isolated spinal neurons in the model. (C)  $V_m$  of spinal neurons  
1661 during a beat-and-glide swimming simulation. The  $V_m$  of a rostral (lightest), middle, and caudal  
1662 (darkest) neuron is shown. L: left, R: right. (D) Heat-map of local body angle. (E) Episode  
1663 duration, (F) inter-episode interval, (G) instantaneous tail beat frequency, and (H) the phase  
1664 delay of left neurons in relation to ipsilateral and contralateral spinal neurons in the 10<sup>th</sup> somite  
1665 during a 10,000 ms simulation. The reference neuron for each polar plot is labelled, and all  
1666 neurons follow the same color-coding as the rest of the figure. A negative phase delay indicates  
1667 that the reference neuron precedes the neuron to which it is compared. A phase of 0 indicates that  
1668 a pair of neurons is in-phase; a phase of  $\pi$  indicates that a pair of neurons is out-of-phase.  
1669 See also **Figure 4 - video 1**.

1670

1671 **Figure 5. Silencing spinal excitatory neurons during beat-and-glide swimming.** Simulations  
1672 consisted of three 5,000 ms epochs. In the middle epoch, silencing of targeted spinal neurons was  
1673 achieved by removing all synaptic and external currents from the targeted population. Synaptic  
1674 and external currents were restored in the last epoch. (A-F) Simulations where V2as were  
1675 silenced and (G-L), where V0vs were silenced. (A, G) *Top*, the functional state of the spinal  
1676 network during the three epochs. *Bottom*, Motoneuron (MN) membrane potential ( $V_m$ ) during  
1677 simulations where targeted neurons were silenced in the middle epoch. The  $V_m$  of a rostral  
1678 (lightest), middle, and caudal (darkest) neuron is shown. (B, H) The integrated muscle output,  
1679 (C, I) episode duration, (D, J) inter-episode intervals, and (E, K) instantaneous tail beat  
1680 frequency during each respective simulation. Averages within epoch are shown in black (mean  $\pm$   
1681 s.d.). Brackets denote significant pairwise differences. (F, L) the left-right coordination of  
1682 somites 5 and 10. L: left, R: right. The first part of epoch 3 of the V2a silenced simulation  
1683 involved synchronous left-right activity, hence the lack of instantaneous tail beat frequency  
1684 values. **Statistics:** For (C-E), there were no episodes during epoch 2. There were no statistically  
1685 significant differences between epoch 1 and 3 for any of the parameters. (I)  $F_{2,31} = 7.2$ ,  $p =$   
1686  $0.0029$ . (J)  $F_{2,28} = 10.2$ ,  $p = 0.001$ . (K)  $F_{2,115} = 3.0$ ,  $p = 0.055$ . P-values for t-tests are found in  
1687 **Figure 5 - supplementary table 1**.

1688 See also **Figure 5 - figure supplement 1** and **Figure 5 - video 1** and **2**.

1689

1690 **Figure 5 - figure supplement 1. Membrane potential ( $V_m$ ) of spinal neurons during**  
1691 **simulations of beat-and-glide swimming where excitatory neurons were silenced.**

1692 Simulations consisted of three 5,000 ms epochs. In the middle epoch, silencing of targeted spinal  
1693 neurons was achieved by removing all synaptic and external currents from the targeted  
1694 population. Synaptic and external currents were restored in the last epoch. (A-E) Simulations  
1695 where V2as were silenced and (F-J), where V0vs were silenced in the middle epoch. The  $V_m$  of  
1696 a rostral (lightest), middle, and caudal (darkest) neuron is shown. L: left, R: right.

1697

1698 **Figure 6. Silencing spinal inhibitory neurons during beat-and-glide swimming.** Simulations  
1699 consisted of three 5,000 ms epochs. In the middle epoch, silencing of targeted spinal neurons was  
1700 achieved by removing all synaptic and external currents from the targeted population. Synaptic  
1701 and external currents were restored in the last epoch. (A-F) Simulations where V1s were silenced  
1702 and (G-L), where dI6s were silenced. (A, G) *Top*, the functional state of the spinal network  
1703 during the three epochs. *Bottom*, Motoneuron (MN) membrane potential ( $V_m$ ) during simulations  
1704 where targeted neurons were silenced in the middle epoch. The  $V_m$  of a rostral (lightest), middle,  
1705 and caudal (darkest) neuron is shown. (B, H) The integrated muscle output, (C, I) episode  
1706 duration, (D, J) inter-episode intervals, and (E, K) instantaneous tail beat frequency during each  
1707 respective simulation. Averages within epoch are shown in black (mean  $\pm$  s.d.). Brackets denote  
1708 significant pairwise differences. (F, L) the left-right coordination of somites 5 and 10. L: left, R:  
1709 right. **Statistics:** (C)  $F_{2,25} = 10.5$ ,  $p = 5.8 \times 10^{-4}$ . (D)  $F_{2,22} = 6.6$ ,  $p = 0.0063$ . (E)  $F_{2,214} = 6.9$ ,  $p =$   
1710  $0.0013$ . (I)  $F_{2,31} = 2.5$   $p = 0.10$ . (J)  $F_{2,28} = 0.9$ ,  $p = 0.42$ . (K)  $F_{2,145} = 3.5$ ,  $p = 0.033$ . P-values for  
1711 t-tests are found in **Figure 6 - supplementary table 1**.

1712 See also **Figure 6 - figure supplement 1** and **2** and **Figure 6 - video 1** and **2**.

1713

1714 **Figure 6 - figure supplement 1. Membrane potential ( $V_m$ ) of spinal neurons during**  
1715 **simulations of beat-and-glide swimming where inhibitory neurons were silenced.**

1716 Simulations consisted of three 5,000 ms epochs. In the middle epoch, silencing of targeted spinal  
1717 neurons was achieved by removing all synaptic and external currents from the targeted  
1718 population. Synaptic and external currents were restored in the last epoch. (A-E) Simulations

1719 where VIs were silenced and (F-J), where dI6s were silenced in the middle epoch. The  $V_m$  of a  
1720 rostral (lightest), middle, and caudal (darkest) neuron is shown. L: left, R: right.

1721

1722 **Figure 6 - figure supplement 2. Altered kinematics during silencing of dI6 neurons.**

1723 Simulation of a 30-somite beat-and-glide swimming model consisted of three 5,000 ms epochs.  
1724 In the middle epoch, silencing of dI6s was achieved by removing all synaptic and external  
1725 currents from the targeted population. Synaptic and external currents were restored in the last  
1726 epoch. Representative body midlines are shown for each epoch along with a probability density  
1727 histogram of the y-coordinate of the terminal somite during each epoch. The histograms are  
1728 truncated at 0.05 as there were many points at  $y = 0$  during inter-episode intervals. The magenta  
1729 to yellow color coding represents the progression through each epoch. Details of the 30-somite  
1730 model are described in **Figure 8 - figure supplement 1**

1731

1732 **Figure 7. Simulating the effects of strychnine on beat-and-glide swimming.** Simulations to  
1733 assess the effects of blocking glycinergic transmission consisted of three 5,000 ms epochs. In the  
1734 middle epoch, all glycinergic currents were blocked. Glycinergic transmission was restored in the  
1735 last epoch. (A) Motoneuron (MN) membrane potential ( $V_m$ ) during simulations where glycinergic  
1736 transmission was blocked in the middle epoch. The  $V_m$  of a rostral (lightest), middle, and caudal  
1737 (darkest) neuron is shown. (B) The integrated muscle output, (C) episode duration, (D) inter-  
1738 episode intervals, and (E) instantaneous tail beat frequency during this simulation. Averages  
1739 within epoch are shown in black (mean  $\pm$  s.d.). (F) The left-right coordination of somites 5 and 10.  
1740 L: left, R: right. **Statistics:** (C)  $F_{2,24} = 2.5$ ,  $p = 2.2 \times 10^{-6}$ . (D)  $F_{2,21} = 32.0$ ,  $p = 8.3 \times 10^{-7}$ . (E)  $F_{2,267}$   
1741  $= 8.3$ ,  $p = 0.0003$ . P-values for t-tests are found in **Figure 7 - supplementary table 1**. See also See  
1742 also **Figure 7 - figure supplement 1 and Figure 7 - video 1**

1743

1744 **Figure 7 - figure supplement 1. Altered kinematics during strychnine.** Simulation of the base  
1745 beat-and-glide swimming model consisted of three 5,000 ms epochs. In the middle epoch, all  
1746 glycinergic currents were blocked. Glycinergic transmission was restored in the last epoch.  
1747 Representative body midlines are shown for each epoch along with a probability density  
1748 histogram of the y-coordinate of the terminal somite during each epoch. The histograms are



1749 truncated at 0.05 as there were many points at  $y = 0$  during inter-episode intervals. The magenta  
1750 to yellow color coding represents the progression through each epoch.

1751  
1752 **Figure 8. Beat-and-glide models with bursting V2a (A-F) or only tonic neurons (G-L).** (A, G)  
1753 Membrane potential ( $V_m$ ) response of isolated neurons in the model to a current step. (B, H)  $V_m$   
1754 of spinal neurons during swimming simulation. The membrane potential of a rostral (lightest),  
1755 middle, and caudal (darkest) neuron is shown. L: left, R: right. (C, I) Heat-map of local body angle.  
1756 (D, J) Episode duration, (E, K) inter-episode interval, and (F, L) instantaneous tail beat frequency  
1757 during the same simulations as B and H, respectively.

1758 See also **Figure 8 - figure supplement 1** and **2**, and **video 1** and **2**.

1759  
1760 **Figure 8 - figure supplement 1. Beat-and-glide swimming model with different number of**  
1761 **somites.** (A, F) Membrane potential ( $V_m$ ) of spinal neurons during a beat-and-glide swimming  
1762 simulation. The  $V_m$  of a rostral (lightest), middle, and caudal (darkest) neuron is shown. L: left,  
1763 R: right. (B, G) Heat-map of local body angle, (C, H) episode duration, (D, I) inter-episode  
1764 interval, and (E, J) instantaneous tail beat frequency during the same simulations as A and F,  
1765 respectively.

1766  
1767 **Figure 8 - figure supplement 2. Sensitivity of beat-and-glide swimming to variability in**  
1768 **glycinergic reversal potential ( $E_{gly}$ ).** Five 10,000-ms long simulations were run for each value of  
1769  $E_{gly}$ . (A) Episode duration, (B) inter-episode intervals, and (C) average tail beat frequency during  
1770 each swimming episode. (D) The minimum coefficient of the cross-correlation of left and right  
1771 muscle was calculated at each  $E_{gly}$ . The minimum coefficient was taken between -10 and 10 ms  
1772 time delays. Asterisks denote significant differences detected using a one-factor ANOVA test.  
1773 Each run is color coded. **Statistics:** (A)  $F_{8,681} = 74.9$ ,  $p = 2.7 \times 10^{-88}$ . (B)  $F_{8,681} = 32.6$ ,  $p = 1.5 \times 10^{-43}$ .  
1774 (C)  $F_{8,36} = 22.9$ ,  $p = 6.0 \times 10^{-12}$ . (D)  $F_{8,36} = 327.8$ ,  $p = 3.0 \times 10^{-31}$ . P-values for t-tests are found  
1775 in **Figure 8 - supplementary table 1**.

1776  
1777 **Figure 9. Sensitivity of beat-and-glide swimming to tonic motor command amplitude, length**  
1778 **of rostrocaudal projections, and synaptic weighting.** Ten 10,000-ms long simulations were run  
1779 for each value of  $\sigma_d$  (A-D),  $\sigma_L$  (E-H), and  $\sigma_w$  (I-L) tested. (A, E, I) Episode duration. (B, F, J)

1780 Inter-episode interval. **(C, G, K)** Average tail beat frequency during each swimming episode. **(D,**  
1781 **H, L)** Minimum coefficient of the cross-correlation of left and right muscle. The minimum was  
1782 taken between -10 and 10 ms time delays. Each circle represents a single swimming episode **(A,**  
1783 **E, I)**, inter-episode interval **(B, F, J)**, or a single run (all other panels). Each run is color coded.  
1784 Runs with only one side showing activity are not depicted in **(D)** and **(H)**. Asterisks denote  
1785 significant differences detected using a one-factor ANOVA test. **Statistics:** **(A)**  $F_{5,1253} = 2.5$ ,  $p =$   
1786  $0.03$ . (Note that there were no pairwise differences detected). **(B)**  $F_{5,1253} = 11.2$ ,  $p = 1.3 \times 10^{-10}$ .  
1787 **(C)**  $F_{5,54} = 1.9$ ,  $p = 0.11$ . **(D)**  $F_{5,54} = 14.5$ ,  $p = 5.2 \times 10^{-9}$ . **(E)**  $F_{5,1253} = 8.7$ ,  $p = 3.8 \times 10^{-8}$ . **(F)**  $F_{5,1253}$   
1788  $= 118.1$ ,  $p = 2.0 \times 10^{-102}$ . **(G)**  $F_{5,54} = 4.0$ ,  $p = 0.004$ . **(H)**  $F_{5,54} = 3.2$ ,  $p = 0.014$ . **(I)**  $F_{5,1400} = 13.5$ ,  $p$   
1789  $= 6.8 \times 10^{-13}$ . **(J)**  $F_{5,1400} = 74.5$ ,  $p = 2.5 \times 10^{-69}$ . **(K)**  $F_{5,53} = 1.3$ ,  $p = 0.30$ . **(L)**  $F_{5,53} = 0.8$ ,  $p = 0.55$ .  
1790 P-values for t-tests are found in **Figure 9 - supplementary table 1**.

1791  
1792 **Figure 10. Sensitivity of beat-and-glide swimming to variability in membrane potential**  
1793 **dynamics.** Ten 10,000-ms long simulations were run at each value of  $\sigma_p$  **(A-D)**. **(A)** Episode  
1794 duration. **(B)** Inter-episode interval. **(C)** Average tail beat frequency during each swimming  
1795 episode. **(D)** Minimum coefficient of the cross-correlation of left and right muscle. The minimum  
1796 was taken between -10 and 10 ms time delays. Each circle represents a single swimming episode  
1797 **(A)**, inter-episode interval **(B)** or a single run **(C, D)**. Each run is color-coded. Runs not depicted  
1798 exhibited either continual motor activity with no gliding pauses or no swimming activity. Asterisks  
1799 denote significant differences detected using a one-factor ANOVA test. **(E)** Responses to a 1-s  
1800 long step current of all neurons on the left side in a model where  $\sigma_p = 0.01$ . Step current amplitudes  
1801 varied between populations of neurons. The amplitude of the step currents to each population is  
1802 the same as in **Figure 4B**. The simulation of the model with these neurons generated continued  
1803 swimming activity with no gliding pauses. The neurons are ordered by somite, from somite 1 at  
1804 the top to somite 15 at the bottom. **Statistics:** **(A)**  $F_{2,211} = 143.8$ ,  $p = 4.0 \times 10^{-40}$ . **(B)**  $F_{2,211} = 32.3$ ,  
1805  $p = 5.8 \times 10^{-13}$ . **(C)**  $F_{5,53} = 4.0$ ,  $p = 0.0036$ . **(D)**  $F_{5,53} = 2.1$ ,  $p = 0.085$ . P-values for t-tests are found  
1806 in **Figure 10 - supplementary table 1**.

1807  
1808 **Figure 11. Summary figure of computational models of zebrafish locomotor movements**  
1809 **during development.**

1810

- 1811
- 1812
- 1813 Figure 2 - *video 1* Single coiling model
- 1814 Figure 2 - *video 2* Truncated coils
- 1815 Figure 3 - *video 1* Double coiling model
- 1816 Figure 3 - *video 2* Glutamate null double coiling model
- 1817 Figure 3 - *video 3* Overexcited V0v double coiling model
- 1818 Figure 3 - *video 4* Glycine null double coiling model
- 1819 Figure 3 - *video 5* 30-somite double coiling model
- 1820 Figure 4 - *video 1* Beat-and-glide model
- 1821 Figure 5 - *video 1* V2a knockout beat-and-glide model
- 1822 Figure 5 - *video 2* V0v knockout beat-and-glide model
- 1823 Figure 6 - *video 1* V1 knockout beat-and-glide model
- 1824 Figure 6 - *video 2* *dI6* knockout beat-and-glide model
- 1825 Figure 7 - *video 1* Glycine null beat-and-glide model
- 1826 Figure 8 - *video 1* Beat-and-glide with bursting V2a model
- 1827 Figure 8 - *video 2* Swimming model with only tonic neurons
- 1828 Figure 8 - *video 3* 30-somite beat-and-glide model
- 1829
- 1830 Figure 2 - Supplementary table 1
- 1831 Figure 5 - Supplementary table 1
- 1832 Figure 6 - Supplementary table 1
- 1833 Figure 7 - Supplementary table 1
- 1834 Figure 8 - Supplementary table 1
- 1835 Figure 9 - Supplementary table 1
- 1836 Figure 10 - Supplementary table 1
